# Supplementary material for: Profiling and Functional Analysis of Long Noncoding RNAs and mRNAs during Porcine Skeletal Muscle Development
Source: Research Square preprint supplement (doi:10.21203/rs.3.rs-104074/v1), 2020-11-12
Supplement: Supplementary file 1 [file 9236c3cf6652bdc354890c84.xlsx]

## Sheet: Sheet1
Supplementary Table S3. The average growth rate of each stage
Model	VGIS	VRIS	VSIS	Vmax
Logistic	213.981	515.085	169.015	586.818
Von Bertalanffy	108.203	391.808	271.42	465.619
Gompertz	164.886	437.102	241.289	507.378
GIS is gradual increase stage of body weight (i.e. from birth to GRI stage); RIS is rapid increasing stage of body weight (i.e. from GRI stage to RSI stage); MGI is the maximum growth rate; SIS is slowly increasing stage of body weight (i.e. from RSI ever after); Vmax is maximum growth rate in the MGI stage. Units are g/d.
