# Supplementary material for: Profiling and Functional Analysis of Long Noncoding RNAs and mRNAs during Porcine Skeletal Muscle Development
Source: Research Square preprint supplement (doi:10.21203/rs.3.rs-104074/v1), 2020-11-12
Supplement: Supplementary file 2 [file ca8c223ac0927cf65f92154e.xlsx]

## Sheet: GRI-MGI
Table S6. Functional categories of DELs target genes in GRI-MGI
Category	GO	Description	LogP	Enrichment	#GeneInGOAndHitList	Hits	GeneList
KEGG Pathway	hsa04150	mTOR signaling pathway	-5.2	4	15	ATP6V1E1|EIF4EBP1|GRB10|PIK3CA|TNF|TSC2|ULK1|LAMTOR2|LAMTOR1|RRAGD|MLST8|WNT5B|WDR24|STRADA|FNIP1	GRI-MGI_up
GO Biological Processes	GO:0051954	positive regulation of amine transport	-4.7	8	7	GRK2|AVP|DRD2|GDNF|KCNB1|OXT|ACE2	GRI-MGI_up
GO Biological Processes	GO:0016241	regulation of macroautophagy	-4.6	3.5	15	ATP6V1E1|DCN|HMOX1|PIK3CA|TSC2|ULK1|GPSM1|SESN1|HTRA2|LAMTOR2|VPS13C|LAMTOR1|UBQLN4|RRAGD|MLST8	GRI-MGI_up
GO Cellular Components	GO:0034704	calcium channel complex	-4.4	5.5	9	ATP2A1|CACNG1|PDE4B|PDE4D|PKD1|CACNA1H|CACNG4|CATSPERB|CATSPER1	GRI-MGI_up
GO Biological Processes	GO:0003012	muscle system process	-4.3	2.3	27	ADORA2B|GRK2|AIF1|ATP2A1|CHRNA1|DRD2|EDNRB|GDNF|HMOX1|LMNA|MYL3|NOTCH1|OXT|PDE4B|PDE4D|PIK3CA|MAP2K6|SLC8A3|DDX39B|CACNA1H|NUP155|P2RX2|MYOF|PLCE1|ACE2|GRIP2|MLIP	GRI-MGI_up
GO Biological Processes	GO:0002678	positive regulation of chronic inflammatory response	-4.2	30	3	ADORA2B|LTA|TNF	GRI-MGI_up
GO Biological Processes	GO:0072107	positive regulation of ureteric bud formation	-4.2	30	3	GDNF|SIX1|SIX4	GRI-MGI_up
GO Biological Processes	GO:1905278	positive regulation of epithelial tube formation	-4.2	30	3	GDNF|SIX1|SIX4	GRI-MGI_up
GO Biological Processes	GO:0072106	regulation of ureteric bud formation	-4.2	30	3	GDNF|SIX1|SIX4	GRI-MGI_up
GO Molecular Functions	GO:0022836	gated channel activity	-4.2	2.5	22	CACNG1|CHRNA1|CLCN7|GABRR2|ITPR3|KCNB1|KCNJ13|TRPM2|CACNA1H|TSPOAP1|TMC6|RASA3|P2RX2|CACNG4|KCNMB3|PACC1|TTYH3|KCNH6|HVCN1|CATSPER1|TMC8|CCT8L2	GRI-MGI_up
GO Biological Processes	GO:0009991	response to extracellular stimulus	-4.1	2.2	29	ADORA2B|AIF1|DHODH|EIF4EBP1|FOLR1|FOLR2|HMOX1|ITGA4|KCNB1|LTA|MPO|OXT|STAR|WRN|FOSL1|ULK1|AIFM1|P2RX2|EIF2AK1|SESN1|PRLH|NUDT15|SLC39A4|RRAGD|ADIPOR2|WDR24|SGIP1|FNIP1|BHLHA15	GRI-MGI_up
GO Cellular Components	GO:0005891	voltage-gated calcium channel complex	-4.1	6.5	7	CACNG1|PDE4B|PDE4D|CACNA1H|CACNG4|CATSPERB|CATSPER1	GRI-MGI_up
GO Biological Processes	GO:0045995	regulation of embryonic development	-3.9	3.6	12	E4F1|GDNF|LFNG|NOTCH1|SIX1|BAG6|CLASP1|NIPBL|SUFU|SIX4|MKS1|POGLUT1	GRI-MGI_up
GO Cellular Components	GO:0005635	nuclear envelope	-3.9	2.2	26	EDNRB|ITPR3|KPNA1|LMNA|PDE4D|ITSN1|TMPO|BANF1|NUP155|IST1|NUP42|TMC6|P2RX2|AHCTF1|MYOF|HACD3|MRPS23|TERF2IP|SENP2|CUEDC2|NOC4L|MLIP|CHMP7|TMC8|QSOX2|LEMD2	GRI-MGI_up
GO Biological Processes	GO:0008582	regulation of synaptic growth at neuromuscular junction	-3.8	24	3	SIX1|COLQ|SIX4	GRI-MGI_up
GO Molecular Functions	GO:0034481	chondroitin sulfotransferase activity	-3.8	24	3	CHST12|CHST7|CHST13	GRI-MGI_up
GO Biological Processes	GO:0060676	ureteric bud formation	-3.8	24	3	GDNF|SIX1|SIX4	GRI-MGI_up
GO Biological Processes	GO:0031668	cellular response to extracellular stimulus	-3.8	2.7	18	ADORA2B|AIF1|FOLR1|FOLR2|HMOX1|ITGA4|KCNB1|WRN|FOSL1|ULK1|AIFM1|SESN1|NUDT15|SLC39A4|RRAGD|WDR24|FNIP1|BHLHA15	GRI-MGI_up
GO Molecular Functions	GO:0005216	ion channel activity	-3.8	2.3	24	CACNG1|CHRNA1|CLCN7|GABRR2|ITPR3|KCNB1|KCNJ13|PKD1|TRPM2|CACNA1H|TSPOAP1|TMC6|RASA3|P2RX2|CACNG4|KCNMB3|PACC1|TTYH3|KCNH6|SLC4A11|HVCN1|CATSPER1|TMC8|CCT8L2	GRI-MGI_up
GO Biological Processes	GO:0048484	enteric nervous system development	-3.8	13	4	PHOX2A|EDNRB|GDNF|TLX2	GRI-MGI_up
GO Cellular Components	GO:0000139	Golgi membrane	-3.7	1.9	36	AP1G1|TMEM50B|ENTPD6|EXT1|FOLR1|IFNGR2|LFNG|NOTCH1|NUMA1|PKD1|BAIAP3|CYTH3|SEC16A|COG5|SEC23B|SLC35A1|MAN1A2|ERC1|ABCA5|RAB26|MOB4|GPSM1|PLCE1|NDFIP2|RNF121|CHST12|CHST7|INPP5E|MAN1C1|CASD1|GNPTG|SLC9A7|GAL3ST3|CHST13|QSOX2|SLC16A13	GRI-MGI_up
GO Biological Processes	GO:0016236	macroautophagy	-3.7	2.5	19	ATP6V1E1|DCN|HMOX1|PIK3CA|TSC2|ULK1|TECPR1|GPSM1|SESN1|HTRA2|LAMTOR2|VPS28|VPS13C|LAMTOR1|MFN1|UBQLN4|RRAGD|MLST8|PGAM5	GRI-MGI_up
GO Biological Processes	GO:0033605	positive regulation of catecholamine secretion	-3.6	12	4	GRK2|GDNF|KCNB1|OXT	GRI-MGI_up
GO Cellular Components	GO:0005815	microtubule organizing center	-3.6	1.9	35	CFAP410|KIFC1|NUMA1|PDE4B|PDE4D|PHF1|PPP2R5A|WRN|UXT|KAT2B|CDC16|KIF3B|IST1|ACTR1A|TACC2|ENTR1|CCDC85B|NINL|ERC1|DDHD2|FBXW11|CLASP1|TTC19|MKS1|TTC12|CEP55|PPP4R3A|RRAGD|RABEP2|SPECC1|SGO1|WDR90|TSGA10IP|CEP57L1|FAM92B	GRI-MGI_up
GO Molecular Functions	GO:0022838	substrate-specific channel activity	-3.6	2.2	24	CACNG1|CHRNA1|CLCN7|GABRR2|ITPR3|KCNB1|KCNJ13|PKD1|TRPM2|CACNA1H|TSPOAP1|TMC6|RASA3|P2RX2|CACNG4|KCNMB3|PACC1|TTYH3|KCNH6|SLC4A11|HVCN1|CATSPER1|TMC8|CCT8L2	GRI-MGI_up
GO Biological Processes	GO:0060047	heart contraction	-3.6	2.6	18	GRK2|ATP2A1|CACNG1|ACE|DRD2|ITPR3|MYL3|OXT|PDE4B|PDE4D|PIK3CA|MAP2K6|SLC8A3|CACNA1H|NUP155|CACNG4|ACE2|POPDC2	GRI-MGI_up
GO Biological Processes	GO:0051235	maintenance of location	-3.6	2.4	20	ATP2A1|CD19|DRD2|FLNB|ITPR3|NFKBIL1|TONSL|PDE4D|PKD1|PLCG2|SOAT1|TNF|TRPM2|RASA3|PLCE1|SUFU|VPS13C|SELENON|ANKRD13C|TLN2	GRI-MGI_up
GO Molecular Functions	GO:0015267	channel activity	-3.6	2.2	25	CACNG1|CHRNA1|CLCN7|GABRR2|ITPR3|KCNB1|KCNJ13|PKD1|TRPM2|CACNA1H|TSPOAP1|TMC6|RASA3|P2RX2|CACNG4|KCNMB3|PACC1|TTYH3|KCNH6|SLC4A11|HVCN1|CATSPER1|TMC8|CCT8L2|GJB7	GRI-MGI_up
GO Molecular Functions	GO:0022803	passive transmembrane transporter activity	-3.6	2.2	25	CACNG1|CHRNA1|CLCN7|GABRR2|ITPR3|KCNB1|KCNJ13|PKD1|TRPM2|CACNA1H|TSPOAP1|TMC6|RASA3|P2RX2|CACNG4|KCNMB3|PACC1|TTYH3|KCNH6|SLC4A11|HVCN1|CATSPER1|TMC8|CCT8L2|GJB7	GRI-MGI_up
KEGG Pathway	hsa_M00073	N-glycan precursor trimming	-3.5	20	3	MOGS|MAN1A2|MAN1C1	GRI-MGI_up
KEGG Pathway	M00073	N-glycan precursor trimming	-3.5	20	3	MOGS|MAN1A2|MAN1C1	GRI-MGI_up
GO Biological Processes	GO:0006936	muscle contraction	-3.5	2.3	21	ADORA2B|GRK2|ATP2A1|CHRNA1|DRD2|EDNRB|GDNF|MYL3|OXT|PDE4B|PDE4D|PIK3CA|MAP2K6|SLC8A3|CACNA1H|NUP155|P2RX2|MYOF|PLCE1|ACE2|GRIP2	GRI-MGI_up
GO Molecular Functions	GO:0022839	ion gated channel activity	-3.5	2.4	20	CACNG1|CHRNA1|CLCN7|GABRR2|ITPR3|KCNB1|KCNJ13|TRPM2|CACNA1H|TSPOAP1|RASA3|P2RX2|CACNG4|KCNMB3|PACC1|TTYH3|KCNH6|HVCN1|CATSPER1|CCT8L2	GRI-MGI_up
GO Biological Processes	GO:0070588	calcium ion transmembrane transport	-3.4	2.4	19	ATP2A1|CACNG1|CD19|DRD2|ITPR3|PDE4B|PDE4D|PKD1|PLCG2|SLC8A3|TRPM2|CACNA1H|RASA3|PMPCA|CACNG4|PLCE1|SELENON|CATSPER1|BHLHA15	GRI-MGI_up
GO Biological Processes	GO:0003015	heart process	-3.4	2.5	18	GRK2|ATP2A1|CACNG1|ACE|DRD2|ITPR3|MYL3|OXT|PDE4B|PDE4D|PIK3CA|MAP2K6|SLC8A3|CACNA1H|NUP155|CACNG4|ACE2|POPDC2	GRI-MGI_up
GO Biological Processes	GO:0001659	temperature homeostasis	-3.4	3	13	DRD2|EDNRB|EGR1|GRB10|IL4R|NOTCH1|OXT|MAP2K6|TNF|TRPM2|ADIPOR2|PGAM5|FFAR4	GRI-MGI_up
GO Biological Processes	GO:0032008	positive regulation of TOR signaling	-3.4	6	6	PIK3CA|LAMTOR2|LAMTOR1|RRAGD|MLST8|WDR24	GRI-MGI_up
GO Biological Processes	GO:0060541	respiratory system development	-3.3	2.8	14	EIF4EBP1|NOTCH1|PKD1|RBP4|SIX1|TNF|BAG6|AIMP2|MAN1A2|SIX4|LOXL3|DISP1|ASXL1|ATXN1L	GRI-MGI_up
GO Biological Processes	GO:0009651	response to salt stress	-3.3	7.4	5	AVP|OXT|TNF|PAPPA2|EFHD1	GRI-MGI_up
GO Cellular Components	GO:0071541	eukaryotic translation initiation factor 3 complex, eIF3m	-3.3	17	3	EIF3B|EIF3H|EIF3M	GRI-MGI_up
GO Cellular Components	GO:0031965	nuclear membrane	-3.3	2.4	18	EDNRB|ITPR3|LMNA|PDE4D|NUP155|NUP42|TMC6|P2RX2|AHCTF1|MYOF|HACD3|MRPS23|SENP2|CUEDC2|NOC4L|TMC8|QSOX2|LEMD2	GRI-MGI_up
GO Cellular Components	GO:0005813	centrosome	-3.3	2	26	NUMA1|PDE4B|PDE4D|PHF1|PPP2R5A|WRN|UXT|KAT2B|CDC16|KIF3B|IST1|ACTR1A|ENTR1|CCDC85B|NINL|ERC1|FBXW11|CLASP1|TTC19|MKS1|TTC12|CEP55|RRAGD|RABEP2|SGO1|CEP57L1	GRI-MGI_up
GO Biological Processes	GO:0060627	regulation of vesicle-mediated transport	-3.3	2	27	ABL2|ADORA2B|AP1G1|ALOX15|DRD2|HMOX1|IL4R|KCNB1|NOTCH1|PLCG2|ITSN1|TNF|TSC2|CACNA1H|BAIAP3|ZFYVE16|CLASP1|RAB26|LRRTM2|LDLRAP1|VPS28|RAB25|SMAP1|RAB17|SGIP1|SYT12|GSG1L	GRI-MGI_up
GO Biological Processes	GO:0043200	response to amino acid	-3.3	3.5	10	CFL1|COL1A2|DHODH|SIX1|TNF|AIFM1|SESN1|LAMTOR2|LAMTOR1|RRAGD	GRI-MGI_up
GO Biological Processes	GO:0046434	organophosphate catabolic process	-3.2	2.6	16	GPI|ITPA|NTHL1|PDE4B|PDE4D|PFKFB3|PFKL|PLCG2|NUP155|NUP42|ABHD12|NUDT15|INPP5E|PRTFDC1|ADPGK|JMJD8	GRI-MGI_up
GO Biological Processes	GO:0014902	myotube differentiation	-3.2	3.5	10	IL4R|NOTCH1|SIX1|CACNA1H|P2RX2|MYOF|SIX4|SELENON|SMYD3|BHLHA15	GRI-MGI_up
GO Biological Processes	GO:0016197	endosomal transport	-3.2	2.6	15	TMEM50B|BAIAP3|ZFYVE16|TOM1|VPS26C|ENTR1|LMTK2|ERC1|SNX8|VPS28|LAMTOR1|LRRC7|RAB17|GRIP2|CHMP7	GRI-MGI_up
GO Biological Processes	GO:0050803	regulation of synapse structure or activity	-3.2	2.6	15	CFL1|DRD2|OXT|ITSN1|SIX1|TNF|COLQ|SYNGAP1|LZTS3|NGEF|LRRTM2|SIX4|RAB17|SYNDIG1|LRRC24	GRI-MGI_up
GO Biological Processes	GO:0042994	cytoplasmic sequestering of transcription factor	-3.2	9.4	4	NFKBIL1|TONSL|PKD1|SUFU	GRI-MGI_up
GO Biological Processes	GO:0009166	nucleotide catabolic process	-3.1	2.8	13	GPI|ITPA|NTHL1|PDE4B|PDE4D|PFKFB3|PFKL|NUP155|NUP42|NUDT15|PRTFDC1|ADPGK|JMJD8	GRI-MGI_up
GO Molecular Functions	GO:0015085	calcium ion transmembrane transporter activity	-3.1	3.2	11	ATP2A1|CACNG1|ITPR3|PKD1|SLC8A3|TRPM2|CACNA1H|TSPOAP1|RASA3|CACNG4|CATSPER1	GRI-MGI_up
GO Biological Processes	GO:0072172	mesonephric tubule formation	-3.1	15	3	GDNF|SIX1|SIX4	GRI-MGI_up
GO Biological Processes	GO:0048483	autonomic nervous system development	-3.1	5.3	6	PHOX2A|EDNRB|GDNF|TLX2|SIX1|PRLH	GRI-MGI_up
GO Biological Processes	GO:0090257	regulation of muscle system process	-3.1	2.5	16	ADORA2B|GRK2|AIF1|ATP2A1|LMNA|MYL3|NOTCH1|OXT|PDE4B|PDE4D|SLC8A3|DDX39B|PLCE1|ACE2|MLIP|FBXO32	GRI-MGI_up
GO Biological Processes	GO:0001816	cytokine production	-3.1	1.8	35	ADORA2B|AIF1|AIRE|CD80|DDX1|DRD2|EGR1|HMOX1|HSPD1|IL4R|IL5RA|KARS1|LTA|LUM|MNDA|NFKBIL1|NOTCH1|PDE4B|PDE4D|PLCG2|TNF|EPX|ARHGEF2|LRRFIP1|GPNMB|POLR3F|IGF2BP2|FOXP1|HERC5|UBE2J1|ACE2|CARD9|CUEDC2|NFATC2IP|FFAR4	GRI-MGI_up
GO Molecular Functions	GO:0004386	helicase activity	-3	2.9	12	DDX1|HELLS|MCM5|WRN|DDX39B|GINS1|HELZ|DDX27|EP400|CHTF18|DQX1|DDX51	GRI-MGI_up
KEGG Pathway	hsa01523	Antifolate resistance	-3	6.5	5	FOLR1|FOLR2|GART|TNF|ABCG2	GRI-MGI_up
GO Biological Processes	GO:0061919	process utilizing autophagic mechanism	-3	2	25	ABL2|ATP6V1E1|DCN|DRD2|HMOX1|PIK3CA|TSC2|ULK1|STUB1|TECPR1|GPSM1|SESN1|HTRA2|LAMTOR2|VPS28|VPS13C|LAMTOR1|MFN1|UBQLN4|RRAGD|MLST8|TRIM8|WDR24|ATG4C|PGAM5	GRI-MGI_up
GO Biological Processes	GO:0006914	autophagy	-3	2	25	ABL2|ATP6V1E1|DCN|DRD2|HMOX1|PIK3CA|TSC2|ULK1|STUB1|TECPR1|GPSM1|SESN1|HTRA2|LAMTOR2|VPS28|VPS13C|LAMTOR1|MFN1|UBQLN4|RRAGD|MLST8|TRIM8|WDR24|ATG4C|PGAM5	GRI-MGI_up
GO Biological Processes	GO:0071417	cellular response to organonitrogen compound	-3	1.9	28	AIF1|ATP6V1E1|COL1A2|CTNNA1|EGR1|EIF4EBP1|FOLR1|FOLR2|GRB10|ITGA4|PDE4B|PDE4D|PIK3CA|PTPRA|SIX1|SLC8A3|STAR|TNF|TRPM2|TSC2|KAT2B|ARHGEF2|BCAR1|SESN1|LAMTOR2|LAMTOR1|BAIAP2L1|RRAGD	GRI-MGI_up
GO Biological Processes	GO:1901292	nucleoside phosphate catabolic process	-3	2.8	13	GPI|ITPA|NTHL1|PDE4B|PDE4D|PFKFB3|PFKL|NUP155|NUP42|NUDT15|PRTFDC1|ADPGK|JMJD8	GRI-MGI_up
GO Biological Processes	GO:1901699	cellular response to nitrogen compound	-3	1.8	30	GRK2|AIF1|ATP6V1E1|COL1A2|CTNNA1|EGR1|EIF4EBP1|FOLR1|FOLR2|GRB10|ITGA4|PDE4B|PDE4D|PIK3CA|PTPRA|SIX1|SLC8A3|STAR|TNF|TRPM2|TSC2|KAT2B|AIFM1|ARHGEF2|BCAR1|SESN1|LAMTOR2|LAMTOR1|BAIAP2L1|RRAGD	GRI-MGI_up
GO Biological Processes	GO:0001101	response to acid chemical	-2.9	2.2	19	ABL2|CFL1|COL1A2|DHODH|EGR1|FOLR1|FOLR2|OXT|RBP4|SIX1|TNF|AIFM1|SESN1|HTRA2|LAMTOR2|LAMTOR1|RRAGD|WNT5B|ASXL1	GRI-MGI_up
GO Biological Processes	GO:0060538	skeletal muscle organ development	-2.9	2.8	12	CHRNA1|DCN|EGR1|FLNB|NOTCH1|SIX1|P2RX2|SIX4|SELENON|POPDC2|DISP1|LEMD2	GRI-MGI_up
GO Biological Processes	GO:0003266	regulation of secondary heart field cardioblast proliferation	-2.9	13	3	NOTCH1|SIX1|MKS1	GRI-MGI_up
GO Biological Processes	GO:0002676	regulation of chronic inflammatory response	-2.9	13	3	ADORA2B|LTA|TNF	GRI-MGI_up
GO Biological Processes	GO:0031929	TOR signaling	-2.9	3.2	10	EIF4EBP1|PIK3CA|TSC2|SESN1|LAMTOR2|LAMTOR1|RRAGD|MLST8|WDR24|FNIP1	GRI-MGI_up
GO Molecular Functions	GO:0005261	cation channel activity	-2.9	2.3	18	CACNG1|CHRNA1|ITPR3|KCNB1|KCNJ13|PKD1|TRPM2|CACNA1H|TSPOAP1|RASA3|P2RX2|CACNG4|KCNMB3|KCNH6|SLC4A11|HVCN1|CATSPER1|CCT8L2	GRI-MGI_up
GO Biological Processes	GO:0008015	blood circulation	-2.9	1.9	26	ADORA2B|GRK2|ATP2A1|AVP|CACNG1|COL1A2|ACE|DRD2|EDNRB|HMOX1|ITPR3|MYL3|OXT|PDE4B|PDE4D|PIK3CA|MAP2K6|SLC8A3|CACNA1H|NUP155|P2RX2|MYOF|CACNG4|ACE2|POPDC2|GRIP2	GRI-MGI_up
GO Biological Processes	GO:0050807	regulation of synapse organization	-2.9	2.6	14	CFL1|DRD2|OXT|ITSN1|SIX1|TNF|COLQ|LZTS3|NGEF|LRRTM2|SIX4|RAB17|SYNDIG1|LRRC24	GRI-MGI_up
GO Biological Processes	GO:0043112	receptor metabolic process	-2.9	2.7	13	GRK2|DRD2|PLCG2|TNF|LMTK2|LRRTM2|LDLRAP1|CACNG4|LAMTOR1|ACE2|ANKRD13C|GSG1L|DTX3L	GRI-MGI_up
GO Biological Processes	GO:0016242	negative regulation of macroautophagy	-2.9	6.1	5	HMOX1|PIK3CA|TSC2|HTRA2|UBQLN4	GRI-MGI_up
GO Biological Processes	GO:0032006	regulation of TOR signaling	-2.9	3.4	9	PIK3CA|TSC2|SESN1|LAMTOR2|LAMTOR1|RRAGD|MLST8|WDR24|FNIP1	GRI-MGI_up
GO Biological Processes	GO:0001817	regulation of cytokine production	-2.9	1.8	32	ADORA2B|AIF1|CD80|DDX1|DRD2|EGR1|HMOX1|HSPD1|IL4R|IL5RA|KARS1|LTA|LUM|MNDA|NFKBIL1|PDE4B|PDE4D|PLCG2|TNF|EPX|ARHGEF2|LRRFIP1|GPNMB|POLR3F|IGF2BP2|FOXP1|HERC5|UBE2J1|ACE2|CARD9|CUEDC2|FFAR4	GRI-MGI_up
GO Biological Processes	GO:0035094	response to nicotine	-2.9	4.9	6	AVP|CHRNA1|DRD2|HMOX1|STAR|TNF	GRI-MGI_up
GO Biological Processes	GO:0098662	inorganic cation transmembrane transport	-2.9	1.8	33	ATP2A1|ATP6V1E1|ATP5PO|CACNG1|CD19|DRD2|ITPR3|KCNB1|KCNJ13|PDE4B|PDE4D|SLC25A3|PKD1|PLCG2|SLC8A3|TRPM2|CACNA1H|COX17|RASA3|PMPCA|CACNG4|KCNMB3|PLCE1|SLC39A4|SELENON|KCNH6|SLC4A11|HVCN1|SLC9A7|MFSD3|CATSPER1|CCT8L2|BHLHA15	GRI-MGI_up
GO Biological Processes	GO:0090195	chemokine secretion	-2.9	8	4	AIF1|IL4R|TNF|FOXP1	GRI-MGI_up
GO Biological Processes	GO:0021510	spinal cord development	-2.9	3.4	9	PHOX2A|GDNF|NOTCH1|PKD1|GIGYF2|SUFU|TCTN1|DYNC2H1|LOXL3	GRI-MGI_up
GO Biological Processes	GO:0009855	determination of bilateral symmetry	-2.8	3.1	10	FOLR1|NOTCH1|PCSK6|FOXH1|KIF3B|SUFU|MKS1|GREM2|DYNC2H1|DISP1	GRI-MGI_up
GO Biological Processes	GO:1903522	regulation of blood circulation	-2.8	2.3	17	GRK2|ATP2A1|AVP|CACNG1|ACE|DRD2|ITPR3|MYL3|OXT|PDE4B|PDE4D|SLC8A3|CACNA1H|NUP155|CACNG4|ACE2|POPDC2	GRI-MGI_up
GO Biological Processes	GO:0021522	spinal cord motor neuron differentiation	-2.8	5.9	5	PHOX2A|GIGYF2|SUFU|TCTN1|DYNC2H1	GRI-MGI_up
GO Biological Processes	GO:0002931	response to ischemia	-2.8	4.8	6	EGR1|EIF4EBP1|MAP2K6|AIFM1|STUB1|P2RX2	GRI-MGI_up
GO Biological Processes	GO:0009799	specification of symmetry	-2.8	3.1	10	FOLR1|NOTCH1|PCSK6|FOXH1|KIF3B|SUFU|MKS1|GREM2|DYNC2H1|DISP1	GRI-MGI_up
GO Biological Processes	GO:0016239	positive regulation of macroautophagy	-2.8	4.1	7	DCN|HMOX1|TSC2|ULK1|GPSM1|SESN1|VPS13C	GRI-MGI_up
GO Biological Processes	GO:0071230	cellular response to amino acid stimulus	-2.8	4.1	7	COL1A2|SIX1|TNF|SESN1|LAMTOR2|LAMTOR1|RRAGD	GRI-MGI_up
GO Biological Processes	GO:0006302	double-strand break repair	-2.8	2.4	15	DDX1|MCM5|TONSL|WRN|KDM2A|NIPBL|TERF2IP|WDR70|UBQLN4|MUS81|PARP9|ZSWIM7|DTX3L|NSMCE1|C14orf39	GRI-MGI_up
GO Biological Processes	GO:0050808	synapse organization	-2.8	2.1	21	CFL1|CHRNA1|DRD2|GDNF|OXT|POU4F1|ITSN1|SIX1|STAU1|TNF|COLQ|SYNGAP1|LZTS3|P2RX2|NGEF|LRRTM2|SIX4|RAB17|SYNDIG1|ARHGAP39|LRRC24	GRI-MGI_up
GO Biological Processes	GO:0003013	circulatory system process	-2.8	1.9	26	ADORA2B|GRK2|ATP2A1|AVP|CACNG1|COL1A2|ACE|DRD2|EDNRB|HMOX1|ITPR3|MYL3|OXT|PDE4B|PDE4D|PIK3CA|MAP2K6|SLC8A3|CACNA1H|NUP155|P2RX2|MYOF|CACNG4|ACE2|POPDC2|GRIP2	GRI-MGI_up
GO Biological Processes	GO:0051124	synaptic growth at neuromuscular junction	-2.8	12	3	SIX1|COLQ|SIX4	GRI-MGI_up
GO Biological Processes	GO:0043084	penile erection	-2.8	12	3	AVP|EDNRB|OXT	GRI-MGI_up
GO Biological Processes	GO:0030432	peristalsis	-2.8	12	3	DRD2|GDNF|P2RX2	GRI-MGI_up
GO Biological Processes	GO:0042756	drinking behavior	-2.8	12	3	DRD2|OXT|ACE2	GRI-MGI_up
GO Biological Processes	GO:0014821	phasic smooth muscle contraction	-2.8	7.6	4	DRD2|EDNRB|GDNF|P2RX2	GRI-MGI_up
GO Biological Processes	GO:0035813	regulation of renal sodium excretion	-2.8	7.6	4	AVP|DRD2|EDNRB|OXT	GRI-MGI_up
GO Biological Processes	GO:0030166	proteoglycan biosynthetic process	-2.8	4.1	7	BMPR1B|DCN|EXT1|CHST12|CHST7|GAL3ST3|CHST13	GRI-MGI_up
GO Cellular Components	GO:0055037	recycling endosome	-2.8	2.7	12	AP1G1|ITSN1|TNF|ULK1|BAIAP3|ENTR1|LMTK2|LDLRAP1|SLC39A4|RAB25|RAB17|SLC9A7	GRI-MGI_up
GO Biological Processes	GO:0034404	nucleobase-containing small molecule biosynthetic process	-2.8	2.5	14	DHODH|GPI|ITPA|NTHL1|PDE4B|PDE4D|PFKFB3|PFKL|NUP155|NUP42|NUDT15|PRTFDC1|ADPGK|JMJD8	GRI-MGI_up
GO Biological Processes	GO:0032602	chemokine production	-2.8	3.6	8	ADORA2B|AIF1|AIRE|EGR1|HMOX1|IL4R|TNF|FOXP1	GRI-MGI_up
GO Biological Processes	GO:0010506	regulation of autophagy	-2.8	2.2	18	ABL2|ATP6V1E1|DCN|HMOX1|PIK3CA|TSC2|ULK1|GPSM1|SESN1|HTRA2|LAMTOR2|VPS13C|LAMTOR1|UBQLN4|RRAGD|MLST8|TRIM8|WDR24	GRI-MGI_up
GO Biological Processes	GO:0006939	smooth muscle contraction	-2.8	3.3	9	ADORA2B|DRD2|EDNRB|GDNF|OXT|PDE4D|P2RX2|PLCE1|GRIP2	GRI-MGI_up
GO Biological Processes	GO:0008016	regulation of heart contraction	-2.8	2.4	15	GRK2|ATP2A1|CACNG1|DRD2|ITPR3|MYL3|OXT|PDE4B|PDE4D|SLC8A3|CACNA1H|NUP155|CACNG4|ACE2|POPDC2	GRI-MGI_up
GO Biological Processes	GO:0051480	regulation of cytosolic calcium ion concentration	-2.7	2.1	19	ABL2|AVP|CD19|DRD2|EDNRB|ITPR3|OXT|PDE4D|PKD1|PLCG2|PTH1R|SLC8A3|TRPM2|TSPOAP1|RASA3|P2RX2|PLCE1|SELENON|SLC35G1	GRI-MGI_up
GO Biological Processes	GO:0031667	response to nutrient levels	-2.7	1.9	24	DHODH|EIF4EBP1|FOLR1|FOLR2|HMOX1|KCNB1|LTA|MPO|OXT|STAR|WRN|ULK1|AIFM1|P2RX2|EIF2AK1|SESN1|PRLH|SLC39A4|RRAGD|ADIPOR2|WDR24|SGIP1|FNIP1|BHLHA15	GRI-MGI_up
GO Biological Processes	GO:0051640	organelle localization	-2.7	1.8	31	ADORA2B|ATP2A1|DRD2|FOLR1|HMOX1|IL4R|ITGA4|KCNB1|KIFC1|NUMA1|UXT|ARHGEF2|KIF3B|SEC16A|ACTR1A|NINL|CLASP1|TMEM106B|MKS1|LAMTOR1|CEP55|MFN1|RAB17|MLPH|TCTN1|SYNDIG1|LTV1|SYT12|CHMP7|BHLHA15|BRAT1	GRI-MGI_up
GO Biological Processes	GO:0009953	dorsal/ventral pattern formation	-2.7	3.6	8	BMPR1B|SUFU|MKS1|SENP2|GREM2|TCTN1|DYNC2H1|DISP1	GRI-MGI_up
GO Biological Processes	GO:0007507	heart development	-2.7	1.8	27	GRK2|FOLR1|LMNA|MYL3|NOTCH1|OXT|PKD1|POU4F1|RBP4|SIX1|TSC2|DDX39B|KAT2B|FOXH1|COX17|NIPBL|PLCE1|SUFU|MKS1|SENP2|POPDC2|CPLANE1|ADIPOR2|DYNC2H1|SPRED1|ASXL1|LEMD2	GRI-MGI_up
GO Biological Processes	GO:0060402	calcium ion transport into cytosol	-2.7	2.8	11	CD19|DRD2|ITPR3|PDE4D|PLCG2|SLC8A3|TRPM2|RASA3|P2RX2|PLCE1|SELENON	GRI-MGI_up
GO Biological Processes	GO:0045777	positive regulation of blood pressure	-2.7	5.4	5	AVP|ACE|OXT|PDE4D|GRIP2	GRI-MGI_up
GO Biological Processes	GO:0003264	regulation of cardioblast proliferation	-2.7	11	3	NOTCH1|SIX1|MKS1	GRI-MGI_up
GO Biological Processes	GO:1904396	regulation of neuromuscular junction development	-2.7	11	3	SIX1|COLQ|SIX4	GRI-MGI_up
GO Biological Processes	GO:0016264	gap junction assembly	-2.7	11	3	CTNNA1|ACE|ACE2	GRI-MGI_up
GO Biological Processes	GO:0001976	neurological system process involved in regulation of systemic arterial blood pressure	-2.7	11	3	DRD2|P2RX2|ACE2	GRI-MGI_up
GO Biological Processes	GO:0021515	cell differentiation in spinal cord	-2.7	4.5	6	PHOX2A|NOTCH1|GIGYF2|SUFU|TCTN1|DYNC2H1	GRI-MGI_up
GO Biological Processes	GO:0005975	carbohydrate metabolic process	-2.6	1.8	28	EXT1|GPI|INPPL1|PFKFB3|PFKL|PIK3CA|PPP1CC|PTH1R|PYGB|RBP4|TNF|MOGS|KAT2B|NUP155|SLC35A1|NUP42|MYOF|CHST12|CHST7|INPP5E|CASD1|ADPGK|GNPTG|GAL3ST3|CHST13|BRAT1|PGP|JMJD8	GRI-MGI_up
GO Biological Processes	GO:0071496	cellular response to external stimulus	-2.6	2.1	18	ADORA2B|AIF1|FOLR1|FOLR2|HMOX1|ITGA4|KCNB1|WRN|FOSL1|ULK1|AIFM1|SESN1|NUDT15|SLC39A4|RRAGD|WDR24|FNIP1|BHLHA15	GRI-MGI_up
GO Biological Processes	GO:0035812	renal sodium excretion	-2.6	7	4	AVP|DRD2|EDNRB|OXT	GRI-MGI_up
GO Biological Processes	GO:0007519	skeletal muscle tissue development	-2.6	2.8	11	CHRNA1|DCN|EGR1|FLNB|NOTCH1|SIX1|P2RX2|SIX4|SELENON|POPDC2|LEMD2	GRI-MGI_up
GO Cellular Components	GO:0016604	nuclear body	-2.6	1.7	33	AIRE|DDX1|DYRK1A|ELF4|INPPL1|LMNA|TONSL|PLAGL1|PPP1CC|SON|WRN|DDX39B|SART1|FIBP|SRSF11|SH3BP5|DCAF7|RNPS1|SF3B2|ATXN2L|UBOX5|SF3B1|ORC3|TERF2IP|NSMCE4A|MAML3|EP400|SENP2|NOC3L|TRIM8|EAF1|MLIP|SNORA38	GRI-MGI_up
GO Biological Processes	GO:0071229	cellular response to acid chemical	-2.6	2.5	13	ABL2|COL1A2|EGR1|FOLR1|FOLR2|SIX1|TNF|SESN1|HTRA2|LAMTOR2|LAMTOR1|RRAGD|WNT5B	GRI-MGI_up
GO Biological Processes	GO:0051301	cell division	-2.6	1.8	27	CDC25A|CFL1|DRD2|E4F1|HELLS|KIFC1|NOTCH1|NUMA1|PPP1CC|RTKN|SON|CDC16|ARHGEF2|KIF3B|BCAR1|IST1|ENTR1|PDS5A|CLASP1|ANAPC15|AHCTF1|CINP|TTC19|CEP55|MICAL3|CHMP7|SGO1	GRI-MGI_up
GO Biological Processes	GO:0010823	negative regulation of mitochondrion organization	-2.6	4.4	6	AVP|LMNA|TSC2|BAG4|HTRA2|FNIP1	GRI-MGI_up
GO Biological Processes	GO:0034605	cellular response to heat	-2.6	2.9	10	HMOX1|HSPA9|BAG4|NUP155|STUB1|NUP42|MYOF|HTRA2|MLST8|CLPB	GRI-MGI_up
GO Cellular Components	GO:0044437	vacuolar part	-2.6	1.8	26	AP1G1|ATP6V1E1|CLCN7|CYB561|DCN|LUM|MNDA|MPO|PYGB|TRPM2|ULK1|IST1|TOM1|KERA|ABCA5|BRI3|TECPR1|LAMTOR2|TMEM106B|LAMTOR1|RRAGD|GNB4|SPNS1|WDR24|LTV1|DTX3L	GRI-MGI_up
GO Biological Processes	GO:0051952	regulation of amine transport	-2.6	3.4	8	GRK2|AVP|DRD2|GDNF|KCNB1|OXT|ACE2|SYT12	GRI-MGI_up
GO Biological Processes	GO:0042116	macrophage activation	-2.6	3.4	8	AIF1|HSPD1|IL4R|KARS1|TNF|CST7|FOXP1|MIR142	GRI-MGI_up
GO Biological Processes	GO:0007264	small GTPase mediated signal transduction	-2.6	1.8	26	ABL2|AIF1|CFL1|CHML|CHN1|COL1A2|DOK1|HMOX1|NOTCH1|RIT1|RTKN|ITSN1|TSC2|SYNGAP1|ARHGEF2|CYTH3|CDC42EP3|RASA3|NGEF|RAB26|RHOD|PLCE1|HACD3|RAB25|RAB17|ARHGAP39	GRI-MGI_up
GO Biological Processes	GO:0061564	axon development	-2.6	1.9	24	BMPR1B|CHN1|CTNNA1|DOK1|DRD2|EXT1|FOLR1|GDNF|GRB10|ITGA4|NOTCH1|PIK3CA|POU4F1|PTPRA|SPTA1|ULK1|SYNGAP1|LGI1|IST1|MYCBP2|RGMA|SEMA6A|TCTN1|CNTN4	GRI-MGI_up
GO Biological Processes	GO:0048871	multicellular organismal homeostasis	-2.6	1.9	23	AVP|DRD2|EDNRB|EGR1|GRB10|IL4R|NOTCH1|OXT|PIK3CA|MAP2K6|PTH1R|RBP4|TNF|TRPM2|LDB2|GIGYF2|PRLH|MKS1|ADIPOR2|SGIP1|PGAM5|FFAR4|CCDC154	GRI-MGI_up
GO Molecular Functions	GO:0051020	GTPase binding	-2.6	1.8	25	ADPRH|AP1G1|CHML|POU4F1|RTKN|ITSN1|TSC2|ULK1|ARHGEF2|CYTH3|KIF3B|SH3BP5|CDC42EP3|MYCBP2|ERC1|XPO6|TBC1D12|NGEF|LAMTOR2|PLCE1|LAMTOR1|MICAL3|RRAGD|MLPH|FNIP1	GRI-MGI_up
GO Biological Processes	GO:0044062	regulation of excretion	-2.6	6.7	4	AVP|DRD2|EDNRB|OXT	GRI-MGI_up
GO Biological Processes	GO:0051220	cytoplasmic sequestering of protein	-2.6	6.7	4	NFKBIL1|TONSL|PKD1|SUFU	GRI-MGI_up
GO Biological Processes	GO:0097553	calcium ion transmembrane import into cytosol	-2.6	2.9	10	CD19|DRD2|ITPR3|PDE4D|PLCG2|SLC8A3|TRPM2|RASA3|PLCE1|SELENON	GRI-MGI_up
GO Molecular Functions	GO:0060090	molecular adaptor activity	-2.6	2.4	14	CHN1|COL1A2|GRB10|ITSN1|AIMP2|EIF3B|SLC9A3R2|ACTR1A|STUB1|SH2B1|LDLRAP1|LAMTOR2|LAMTOR1|MLPH	GRI-MGI_up
GO Biological Processes	GO:0045080	positive regulation of chemokine biosynthetic process	-2.5	10	3	EGR1|HMOX1|TNF	GRI-MGI_up
GO Biological Processes	GO:0051169	nuclear transport	-2.5	2.1	18	HSPA9|KPNA1|LMNA|PKD1|PPP1CC|TSC2|DDX39B|BANF1|SRSF11|NUP155|RNPS1|NUP42|XPO6|SUFU|RBM26|UPF3A|LTV1|STRADA	GRI-MGI_up
GO Biological Processes	GO:0048193	Golgi vesicle transport	-2.5	2	19	AP1G1|FOLR1|SPTA1|CYTH3|KIF3B|SEC16A|ACTR1A|COG5|SEC23B|MON2|DDHD2|RAB26|SNX8|NBAS|VPS13C|DNAJC28|BCAP29|TRAPPC11|LMF1	GRI-MGI_up
GO Biological Processes	GO:0007204	positive regulation of cytosolic calcium ion concentration	-2.5	2.1	17	ABL2|AVP|CD19|DRD2|EDNRB|ITPR3|OXT|PDE4D|PKD1|PLCG2|PTH1R|SLC8A3|TRPM2|RASA3|P2RX2|PLCE1|SELENON	GRI-MGI_up
GO Molecular Functions	GO:0060589	nucleoside-triphosphatase regulator activity	-2.5	2.1	18	ADPRH|CHML|CHN1|RTKN|TSC2|SYNGAP1|SEC23B|RASA3|TBC1D12|GPSM1|HACD3|SMAP1|SIL1|RABEP2|ARHGAP39|FNIP1|AGAP1|PGAM5	GRI-MGI_up
GO Biological Processes	GO:0007368	determination of left/right symmetry	-2.5	3	9	FOLR1|NOTCH1|PCSK6|FOXH1|KIF3B|SUFU|MKS1|DYNC2H1|DISP1	GRI-MGI_up
GO Biological Processes	GO:0032722	positive regulation of chemokine production	-2.5	4.1	6	ADORA2B|AIF1|EGR1|HMOX1|IL4R|TNF	GRI-MGI_up
Hallmark Gene Sets	M5928	HALLMARK MYC TARGETS V2	-2.5	4.1	6	HSPD1|HSPE1|MCM5|AIMP2|NOC4L|PUS1	GRI-MGI_up
KEGG Pathway	hsa04152	AMPK signaling pathway	-2.5	3	9	EIF4EBP1|PFKFB3|PFKL|PIK3CA|PPP2R5A|TSC2|ULK1|ADIPOR2|STRADA	GRI-MGI_up
GO Biological Processes	GO:0007034	vacuolar transport	-2.5	2.8	10	AP1G1|TMEM50B|ZFYVE16|CACNG4|VPS28|NDFIP2|TMEM106B|VPS13C|CHMP7|DTX3L	GRI-MGI_up
GO Biological Processes	GO:0006816	calcium ion transport	-2.5	1.9	21	ATP2A1|CACNG1|CD19|DRD2|ITPR3|PDE4B|PDE4D|PKD1|PLCG2|SLC8A3|TRPM2|CACNA1H|RASA3|P2RX2|PMPCA|CACNG4|PLCE1|SELENON|CATSPER1|SLC35G1|BHLHA15	GRI-MGI_up
GO Biological Processes	GO:0001819	positive regulation of cytokine production	-2.5	1.9	22	ADORA2B|AIF1|CD80|DDX1|DRD2|EGR1|HMOX1|HSPD1|IL4R|KARS1|LTA|LUM|MNDA|PDE4B|PDE4D|PLCG2|TNF|EPX|ARHGEF2|LRRFIP1|POLR3F|CARD9	GRI-MGI_up
GO Biological Processes	GO:0048667	cell morphogenesis involved in neuron differentiation	-2.5	1.8	26	BMPR1B|CFL1|CHN1|DOK1|DRD2|EXT1|GDNF|GRB10|TLX2|ITGA4|NOTCH1|PIK3CA|POU4F1|PTPRA|SPTA1|ULK1|SYNGAP1|LGI1|LZTS3|IST1|MYCBP2|NGEF|TMEM106B|SEMA6A|TCTN1|CNTN4	GRI-MGI_up
GO Biological Processes	GO:0050806	positive regulation of synaptic transmission	-2.5	2.6	11	DRD2|ITPR3|OXT|SLC8A3|STAU1|TNF|BAIAP3|LGI1|LRRTM2|CACNG4|SYT12	GRI-MGI_up
GO Biological Processes	GO:0043393	regulation of protein binding	-2.5	2.4	13	ACE|ITGA4|LFNG|PKD1|SPTA1|STUB1|GPSM1|LDLRAP1|CRBN|SENP2|GREM2|TMC8|DTX3L	GRI-MGI_up
GO Biological Processes	GO:0044057	regulation of system process	-2.5	1.8	27	ADORA2B|GRK2|AIF1|ATP2A1|AVP|CACNG1|ACE|DRD2|EDNRB|ITPR3|LMNA|MYL3|NOTCH1|OXT|PDE4B|PDE4D|SLC8A3|DDX39B|CST7|CACNA1H|NUP155|CACNG4|PLCE1|ACE2|POPDC2|MLIP|FBXO32	GRI-MGI_up
GO Biological Processes	GO:0050657	nucleic acid transport	-2.5	2.5	12	DDX39B|SRSF11|NUP155|IGF2BP2|RNPS1|NUP42|AHCTF1|SENP2|RBM26|UPF3A|LTV1|RFTN2	GRI-MGI_up
GO Biological Processes	GO:0050658	RNA transport	-2.5	2.5	12	DDX39B|SRSF11|NUP155|IGF2BP2|RNPS1|NUP42|AHCTF1|SENP2|RBM26|UPF3A|LTV1|RFTN2	GRI-MGI_up
GO Biological Processes	GO:0006399	tRNA metabolic process	-2.5	2.5	12	DDX1|GTF3C1|KARS1|AIMP2|DUS4L|ADAT1|TRNT1|RARS2|PUS1|MARS2|TARSL2|METTL6	GRI-MGI_up
GO Biological Processes	GO:0071872	cellular response to epinephrine stimulus	-2.4	9.2	3	PDE4B|PDE4D|STAR	GRI-MGI_up
GO Biological Processes	GO:0042538	hyperosmotic salinity response	-2.4	9.2	3	AVP|OXT|EFHD1	GRI-MGI_up
GO Molecular Functions	GO:0034450	ubiquitin-ubiquitin ligase activity	-2.4	9.2	3	UBE2K|STUB1|UBOX5	GRI-MGI_up
GO Cellular Components	GO:0036038	MKS complex	-2.4	9.2	3	MKS1|TMEM231|TCTN1	GRI-MGI_up
GO Biological Processes	GO:0030206	chondroitin sulfate biosynthetic process	-2.4	6.2	4	DCN|CHST12|CHST7|CHST13	GRI-MGI_up
GO Biological Processes	GO:0060914	heart formation	-2.4	6.2	4	FOLR1|SIX1|FOXH1|LEMD2	GRI-MGI_up
GO Biological Processes	GO:0006700	C21-steroid hormone biosynthetic process	-2.4	6.2	4	EGR1|STAR|CACNA1H|TSPOAP1	GRI-MGI_up
GO Molecular Functions	GO:0005262	calcium channel activity	-2.4	2.9	9	CACNG1|ITPR3|PKD1|TRPM2|CACNA1H|TSPOAP1|RASA3|CACNG4|CATSPER1	GRI-MGI_up
GO Cellular Components	GO:0030173	integral component of Golgi membrane	-2.4	4	6	LFNG|SLC35A1|CHST12|MAN1C1|CASD1|QSOX2	GRI-MGI_up
GO Biological Processes	GO:0042181	ketone biosynthetic process	-2.4	4.8	5	EGR1|STAR|CACNA1H|COQ10B|PPTC7	GRI-MGI_up
GO Biological Processes	GO:0060401	cytosolic calcium ion transport	-2.4	2.6	11	CD19|DRD2|ITPR3|PDE4D|PLCG2|SLC8A3|TRPM2|RASA3|P2RX2|PLCE1|SELENON	GRI-MGI_up
GO Biological Processes	GO:0000910	cytokinesis	-2.4	2.6	11	CFL1|DRD2|RTKN|SON|KIF3B|IST1|ENTR1|AHCTF1|TTC19|CEP55|CHMP7	GRI-MGI_up
GO Cellular Components	GO:0034702	ion channel complex	-2.4	2.1	16	ATP2A1|CACNG1|CHRNA1|GABRR2|KCNB1|PDE4B|PDE4D|PKD1|CACNA1H|ABHD12|CACNG4|KCNMB3|LRRC7|CATSPERB|TTYH3|CATSPER1	GRI-MGI_up
GO Biological Processes	GO:0051236	establishment of RNA localization	-2.4	2.5	12	DDX39B|SRSF11|NUP155|IGF2BP2|RNPS1|NUP42|AHCTF1|SENP2|RBM26|UPF3A|LTV1|RFTN2	GRI-MGI_up
GO Biological Processes	GO:0001838	embryonic epithelial tube formation	-2.4	2.9	9	CFL1|FOLR1|GDNF|SIX1|TSC2|SUFU|SIX4|MKS1|TCTN1	GRI-MGI_up
GO Biological Processes	GO:0051209	release of sequestered calcium ion into cytosol	-2.4	2.9	9	CD19|DRD2|ITPR3|PDE4D|PLCG2|TRPM2|RASA3|PLCE1|SELENON	GRI-MGI_up
GO Biological Processes	GO:0015837	amine transport	-2.4	3.1	8	GRK2|AVP|DRD2|GDNF|KCNB1|OXT|ACE2|SYT12	GRI-MGI_up
GO Biological Processes	GO:0007631	feeding behavior	-2.4	3.1	8	DRD2|OXT|POU4F1|GIGYF2|PRLH|ACE2|SGIP1|RXFP4	GRI-MGI_up
GO Biological Processes	GO:0010256	endomembrane system organization	-2.4	1.9	21	LMNA|SPTA1|BAG6|BANF1|BAIAP3|NUP155|IST1|SEC16A|CLASP1|MYOF|VPS28|REEP2|DNAJC28|LAMTOR1|BAIAP2L1|TRAPPC11|DYNC2H1|SGIP1|CHMP7|BHLHA15|LEMD2	GRI-MGI_up
GO Biological Processes	GO:0030324	lung development	-2.4	2.6	11	EIF4EBP1|NOTCH1|PKD1|RBP4|TNF|BAG6|AIMP2|MAN1A2|LOXL3|ASXL1|ATXN1L	GRI-MGI_up
GO Biological Processes	GO:0035148	tube formation	-2.4	2.7	10	CFL1|FOLR1|GDNF|NOTCH1|SIX1|TSC2|SUFU|SIX4|MKS1|TCTN1	GRI-MGI_up
GO Biological Processes	GO:0051668	localization within membrane	-2.4	2.7	10	ITGA4|COLQ|SYNGAP1|LGI1|SEC23B|CACNG4|REEP2|LRRC7|GRIP2|GSG1L	GRI-MGI_up
GO Biological Processes	GO:0043032	positive regulation of macrophage activation	-2.4	5.9	4	HSPD1|IL4R|KARS1|MIR142	GRI-MGI_up
GO Molecular Functions	GO:0022890	inorganic cation transmembrane transporter activity	-2.4	1.8	26	ATP2A1|ATP6V1E1|ATP5PO|CACNG1|CHRNA1|ITPR3|KCNB1|KCNJ13|SLC25A3|PKD1|SLC8A3|TRPM2|CACNA1H|TSPOAP1|RASA3|P2RX2|CACNG4|KCNMB3|SLC39A4|KCNH6|SLC4A11|HVCN1|SLC9A7|MFSD3|CATSPER1|CCT8L2	GRI-MGI_up
GO Biological Processes	GO:0051283	negative regulation of sequestering of calcium ion	-2.4	2.9	9	CD19|DRD2|ITPR3|PDE4D|PLCG2|TRPM2|RASA3|PLCE1|SELENON	GRI-MGI_up
GO Biological Processes	GO:0006941	striated muscle contraction	-2.4	2.5	11	GRK2|ATP2A1|CHRNA1|MYL3|PDE4B|PDE4D|PIK3CA|MAP2K6|SLC8A3|NUP155|ACE2	GRI-MGI_up
GO Biological Processes	GO:0032922	circadian regulation of gene expression	-2.4	3.9	6	DRD2|EGR1|PPP1CC|KDM2A|MYCBP2|KDM8	GRI-MGI_up
GO Biological Processes	GO:0050433	regulation of catecholamine secretion	-2.4	3.9	6	GRK2|DRD2|GDNF|KCNB1|OXT|SYT12	GRI-MGI_up
GO Biological Processes	GO:0035815	positive regulation of renal sodium excretion	-2.3	8.6	3	DRD2|EDNRB|OXT	GRI-MGI_up
KEGG Pathway	hsa05410	Hypertrophic cardiomyopathy (HCM)	-2.3	3.4	7	CACNG1|ACE|ITGA4|LMNA|MYL3|TNF|CACNG4	GRI-MGI_up
GO Biological Processes	GO:0007265	Ras protein signal transduction	-2.3	1.9	21	ABL2|AIF1|CFL1|COL1A2|DOK1|NOTCH1|RIT1|RTKN|ITSN1|SYNGAP1|ARHGEF2|CYTH3|CDC42EP3|RASA3|NGEF|RAB26|RHOD|PLCE1|HACD3|RAB25|RAB17	GRI-MGI_up
GO Molecular Functions	GO:0030695	GTPase regulator activity	-2.3	2.1	16	ADPRH|CHML|CHN1|RTKN|TSC2|SYNGAP1|SEC23B|RASA3|TBC1D12|GPSM1|HACD3|SMAP1|RABEP2|ARHGAP39|AGAP1|PGAM5	GRI-MGI_up
GO Biological Processes	GO:0007588	excretion	-2.3	3.8	6	ADORA2B|AVP|DRD2|EDNRB|HMOX1|OXT	GRI-MGI_up
GO Biological Processes	GO:0045185	maintenance of protein location	-2.3	3.1	8	FLNB|NFKBIL1|TONSL|PKD1|SUFU|VPS13C|ANKRD13C|TLN2	GRI-MGI_up
GO Biological Processes	GO:0030323	respiratory tube development	-2.3	2.5	11	EIF4EBP1|NOTCH1|PKD1|RBP4|TNF|BAG6|AIMP2|MAN1A2|LOXL3|ASXL1|ATXN1L	GRI-MGI_up
GO Biological Processes	GO:0051282	regulation of sequestering of calcium ion	-2.3	2.8	9	CD19|DRD2|ITPR3|PDE4D|PLCG2|TRPM2|RASA3|PLCE1|SELENON	GRI-MGI_up
GO Biological Processes	GO:0006972	hyperosmotic response	-2.3	5.7	4	AVP|OXT|ARHGEF2|EFHD1	GRI-MGI_up
GO Biological Processes	GO:0051963	regulation of synapse assembly	-2.3	3	8	OXT|SIX1|COLQ|LRRTM2|SIX4|RAB17|SYNDIG1|LRRC24	GRI-MGI_up
GO Biological Processes	GO:0006195	purine nucleotide catabolic process	-2.3	4.5	5	ITPA|PDE4B|PDE4D|NUDT15|PRTFDC1	GRI-MGI_up
GO Biological Processes	GO:0006418	tRNA aminoacylation for protein translation	-2.3	4.5	5	KARS1|AIMP2|RARS2|MARS2|TARSL2	GRI-MGI_up
GO Biological Processes	GO:0050432	catecholamine secretion	-2.3	3.8	6	GRK2|DRD2|GDNF|KCNB1|OXT|SYT12	GRI-MGI_up
GO Biological Processes	GO:0070838	divalent metal ion transport	-2.3	1.8	22	ATP2A1|CACNG1|CD19|DRD2|ITPR3|PDE4B|PDE4D|PKD1|PLCG2|SLC8A3|TRPM2|CACNA1H|RASA3|P2RX2|PMPCA|CACNG4|PLCE1|SLC39A4|SELENON|CATSPER1|SLC35G1|BHLHA15	GRI-MGI_up
GO Molecular Functions	GO:0008135	translation factor activity, RNA binding	-2.3	3.3	7	ETF1|TUFM|EIF3B|EIF3H|EIF3M|EIF1AD|EIF4E3	GRI-MGI_up
GO Biological Processes	GO:0051099	positive regulation of binding	-2.3	2.5	11	ACE|LFNG|PKD1|POU4F1|SPTA1|NIPBL|GPSM1|CRBN|DDRGK1|PARP9|DTX3L	GRI-MGI_up
GO Biological Processes	GO:1990126	retrograde transport, endosome to plasma membrane	-2.3	5.5	4	VPS26C|ENTR1|LRRC7|GRIP2	GRI-MGI_up
GO Biological Processes	GO:0006403	RNA localization	-2.3	2.3	13	DDX39B|SRSF11|NUP155|CCT7|IGF2BP2|RNPS1|NUP42|AHCTF1|SENP2|RBM26|UPF3A|LTV1|RFTN2	GRI-MGI_up
GO Biological Processes	GO:0035637	multicellular organismal signaling	-2.3	2.3	12	ATP2A1|AVP|CACNG1|CHRNA1|ITPR3|PDE4D|SLC8A3|CACNA1H|NUP155|CACNG4|KCNMB3|ACE2	GRI-MGI_up
GO Cellular Components	GO:0031228	intrinsic component of Golgi membrane	-2.3	3.7	6	LFNG|SLC35A1|CHST12|MAN1C1|CASD1|QSOX2	GRI-MGI_up
GO Biological Processes	GO:0030100	regulation of endocytosis	-2.3	2.1	15	ABL2|ALOX15|DRD2|PLCG2|ITSN1|TNF|TSC2|ZFYVE16|LRRTM2|LDLRAP1|VPS28|SMAP1|RAB17|SGIP1|GSG1L	GRI-MGI_up
GO Biological Processes	GO:0002437	inflammatory response to antigenic stimulus	-2.3	4.4	5	IL2RA|IL5RA|LTA|NOTCH1|TNF	GRI-MGI_up
GO Biological Processes	GO:0051646	mitochondrion localization	-2.3	4.4	5	ATP2A1|UXT|MFN1|BHLHA15|BRAT1	GRI-MGI_up
GO Cellular Components	GO:0033290	eukaryotic 48S preinitiation complex	-2.2	8	3	EIF3B|EIF3H|EIF3M	GRI-MGI_up
GO Biological Processes	GO:0090197	positive regulation of chemokine secretion	-2.2	8	3	AIF1|IL4R|TNF	GRI-MGI_up
GO Biological Processes	GO:0045073	regulation of chemokine biosynthetic process	-2.2	8	3	EGR1|HMOX1|TNF	GRI-MGI_up
GO Biological Processes	GO:0051208	sequestering of calcium ion	-2.2	2.8	9	CD19|DRD2|ITPR3|PDE4D|PLCG2|TRPM2|RASA3|PLCE1|SELENON	GRI-MGI_up
GO Biological Processes	GO:1901214	regulation of neuron death	-2.2	2	16	EGR1|GDNF|HMOX1|KCNB1|PIK3CA|POU4F1|ITSN1|SIX1|STAR|TNF|AIMP2|SYNGAP1|AIFM1|GPNMB|HTRA2|SIX4	GRI-MGI_up
GO Biological Processes	GO:0051047	positive regulation of secretion	-2.2	1.9	20	ADORA2B|GRK2|AP1G1|AIF1|AVP|DRD2|EDNRB|GDNF|GPI|IL4R|KARS1|KCNB1|OXT|MAP2K6|RBP4|ITSN1|TNF|CACNA1H|BAIAP3|CLASP1	GRI-MGI_up
GO Biological Processes	GO:0072175	epithelial tube formation	-2.2	2.7	9	CFL1|FOLR1|GDNF|SIX1|TSC2|SUFU|SIX4|MKS1|TCTN1	GRI-MGI_up
GO Biological Processes	GO:0006913	nucleocytoplasmic transport	-2.2	2	17	HSPA9|KPNA1|LMNA|PKD1|PPP1CC|TSC2|DDX39B|SRSF11|NUP155|RNPS1|NUP42|XPO6|SUFU|RBM26|UPF3A|LTV1|STRADA	GRI-MGI_up
GO Biological Processes	GO:0072511	divalent inorganic cation transport	-2.2	1.8	22	ATP2A1|CACNG1|CD19|DRD2|ITPR3|PDE4B|PDE4D|PKD1|PLCG2|SLC8A3|TRPM2|CACNA1H|RASA3|P2RX2|PMPCA|CACNG4|PLCE1|SLC39A4|SELENON|CATSPER1|SLC35G1|BHLHA15	GRI-MGI_up
GO Biological Processes	GO:0008217	regulation of blood pressure	-2.2	2.4	11	AVP|COL1A2|ACE|DRD2|EDNRB|HMOX1|OXT|PDE4D|P2RX2|ACE2|GRIP2	GRI-MGI_up
GO Biological Processes	GO:0010821	regulation of mitochondrion organization	-2.2	2.4	11	AVP|DCN|DHODH|LMNA|TSC2|BAG4|DDHD2|FAM162A|HTRA2|VPS13C|FNIP1	GRI-MGI_up
GO Molecular Functions	GO:0042578	phosphoric ester hydrolase activity	-2.2	1.9	18	CDC25A|HMOX1|PDE4B|PDE4D|PDE6C|PFKFB3|PLCG2|PPP1CC|PPP2R5A|PTPRA|PLCE1|INPP5E|PPM1H|PLPP5|PPM1K|PPTC7|PGAM5|PGP	GRI-MGI_up
GO Biological Processes	GO:0071549	cellular response to dexamethasone stimulus	-2.2	5.3	4	EIF4EBP1|STAR|SMYD3|FBXO32	GRI-MGI_up
GO Biological Processes	GO:0098739	import across plasma membrane	-2.2	2.9	8	FOLR1|FOLR2|KCNJ13|SLC7A1|SLC8A3|TRPM2|SLC39A4|SLC9A7	GRI-MGI_up
GO Biological Processes	GO:0051098	regulation of binding	-2.2	1.9	18	ACE|HMOX1|ITGA4|LFNG|PKD1|POU4F1|SPTA1|STUB1|NIPBL|GPSM1|LDLRAP1|CRBN|SENP2|GREM2|DDRGK1|PARP9|TMC8|DTX3L	GRI-MGI_up
GO Molecular Functions	GO:0008324	cation transmembrane transporter activity	-2.2	1.7	27	ATP2A1|ATP6V1E1|ATP5PO|CACNG1|CHRNA1|ITPR3|KCNB1|KCNJ13|SLC25A3|PKD1|SLC7A1|SLC8A3|TRPM2|CACNA1H|TSPOAP1|RASA3|P2RX2|CACNG4|KCNMB3|SLC39A4|KCNH6|SLC4A11|HVCN1|SLC9A7|MFSD3|CATSPER1|CCT8L2	GRI-MGI_up
GO Cellular Components	GO:0035869	ciliary transition zone	-2.2	3.6	6	CFAP410|MKS1|CPLANE1|TMEM231|TCTN1|TSGA10IP	GRI-MGI_up
GO Biological Processes	GO:0050909	sensory perception of taste	-2.2	3.6	6	ITPR3|LPO|P2RX2|REEP2|GNG13|FFAR4	GRI-MGI_up
GO Biological Processes	GO:0000724	double-strand break repair via homologous recombination	-2.2	2.7	9	MCM5|TONSL|WRN|NIPBL|TERF2IP|UBQLN4|MUS81|ZSWIM7|NSMCE1	GRI-MGI_up
KEGG Pathway	hsa04330	Notch signaling pathway	-2.2	4.2	5	LFNG|NOTCH1|KAT2B|MAML3|DTX3L	GRI-MGI_up
GO Biological Processes	GO:0007528	neuromuscular junction development	-2.2	4.2	5	CHRNA1|SIX1|COLQ|P2RX2|SIX4	GRI-MGI_up
GO Molecular Functions	GO:0005245	voltage-gated calcium channel activity	-2.2	4.2	5	CACNG1|CACNA1H|TSPOAP1|CACNG4|CATSPER1	GRI-MGI_up
GO Biological Processes	GO:0043039	tRNA aminoacylation	-2.2	4.2	5	KARS1|AIMP2|RARS2|MARS2|TARSL2	GRI-MGI_up
GO Biological Processes	GO:0021517	ventral spinal cord development	-2.2	4.2	5	PHOX2A|GIGYF2|SUFU|TCTN1|DYNC2H1	GRI-MGI_up
GO Biological Processes	GO:0043523	regulation of neuron apoptotic process	-2.2	2.3	12	GDNF|HMOX1|KCNB1|PIK3CA|POU4F1|ITSN1|SIX1|STAR|TNF|SYNGAP1|AIFM1|SIX4	GRI-MGI_up
GO Cellular Components	GO:0031461	cullin-RING ubiquitin ligase complex	-2.2	2.5	10	GAN|CDC16|DCAF7|FBXW11|ANAPC15|CRBN|KLHL7|FBXO32|FBXL14|FBXL16	GRI-MGI_up
GO Molecular Functions	GO:0005521	lamin binding	-2.2	7.5	3	PPP1CC|TMPO|MLIP	GRI-MGI_up
GO Biological Processes	GO:0071871	response to epinephrine	-2.2	7.5	3	PDE4B|PDE4D|STAR	GRI-MGI_up
GO Biological Processes	GO:2001224	positive regulation of neuron migration	-2.2	7.5	3	ARHGEF2|NIPBL|SEMA6A	GRI-MGI_up
GO Cellular Components	GO:0005852	eukaryotic translation initiation factor 3 complex	-2.2	7.5	3	EIF3B|EIF3H|EIF3M	GRI-MGI_up
GO Biological Processes	GO:0050755	chemokine metabolic process	-2.2	7.5	3	EGR1|HMOX1|TNF	GRI-MGI_up
GO Biological Processes	GO:0042033	chemokine biosynthetic process	-2.2	7.5	3	EGR1|HMOX1|TNF	GRI-MGI_up
GO Biological Processes	GO:0001732	formation of cytoplasmic translation initiation complex	-2.2	7.5	3	EIF3B|EIF3H|EIF3M	GRI-MGI_up
GO Cellular Components	GO:0044441	ciliary part	-2.2	1.8	21	CFAP410|DRD2|PKD1|MOK|KIF3B|ENTR1|ERC1|IQCE|SUFU|TSPEAR|MKS1|INPP5E|CPLANE1|TMEM231|TCTN1|DYNC2H1|RABEP2|WDR90|ENKUR|TSGA10IP|CERKL	GRI-MGI_up
GO Biological Processes	GO:0031669	cellular response to nutrient levels	-2.2	2.2	13	FOLR1|FOLR2|HMOX1|KCNB1|WRN|ULK1|AIFM1|SESN1|SLC39A4|RRAGD|WDR24|FNIP1|BHLHA15	GRI-MGI_up
GO Biological Processes	GO:0000725	recombinational repair	-2.2	2.7	9	MCM5|TONSL|WRN|NIPBL|TERF2IP|UBQLN4|MUS81|ZSWIM7|NSMCE1	GRI-MGI_up
GO Biological Processes	GO:0070997	neuron death	-2.2	2	17	EGR1|GDNF|HMOX1|KCNB1|PIK3CA|POU4F1|ITSN1|SIX1|STAR|TNF|AIMP2|SYNGAP1|AIFM1|GPNMB|FAM162A|HTRA2|SIX4	GRI-MGI_up
GO Biological Processes	GO:0048812	neuron projection morphogenesis	-2.2	1.7	27	BMPR1B|CFL1|CHN1|DOK1|DRD2|EXT1|GDNF|GRB10|TLX2|ITGA4|NOTCH1|PIK3CA|POU4F1|PTPRA|SPTA1|ULK1|SYNGAP1|LGI1|LZTS3|IST1|MYCBP2|NGEF|TMEM106B|SEMA6A|TCTN1|STRADA|CNTN4	GRI-MGI_up
GO Biological Processes	GO:0050804	modulation of chemical synaptic transmission	-2.2	1.8	20	ADORA2B|DRD2|GDNF|ITPR3|KCNB1|OXT|PTPRA|SLC8A3|STAR|STAU1|TNF|SYNGAP1|BAIAP3|LGI1|RAB26|LRRTM2|CACNG4|SYT12|CNTN4|MIR142	GRI-MGI_up
GO Biological Processes	GO:0090075	relaxation of muscle	-2.1	5.2	4	ADORA2B|ATP2A1|PDE4B|PDE4D	GRI-MGI_up
GO Biological Processes	GO:0050650	chondroitin sulfate proteoglycan biosynthetic process	-2.1	5.2	4	DCN|CHST12|CHST7|CHST13	GRI-MGI_up
GO Cellular Components	GO:0098687	chromosomal region	-2.1	2	17	HELLS|MCM5|PPP1CC|PPP2R5A|WRN|KAT2B|CFDP1|PDS5A|CLASP1|ORC3|AHCTF1|TERF2IP|NSMCE4A|ZNFX1|SGO1|NSMCE1|MEIKIN	GRI-MGI_up
GO Cellular Components	GO:0098978	glutamatergic synapse	-2.1	2	17	ADORA2B|DRD2|EIF4EBP1|KPNA1|PPP1CC|ITSN1|STAU1|SYNGAP1|ARHGEF2|LGI1|TSPOAP1|LRRTM2|CACNG4|PPM1H|ARHGAP39|GRIP2|GSG1L	GRI-MGI_up
GO Biological Processes	GO:0099177	regulation of trans-synaptic signaling	-2.1	1.8	20	ADORA2B|DRD2|GDNF|ITPR3|KCNB1|OXT|PTPRA|SLC8A3|STAR|STAU1|TNF|SYNGAP1|BAIAP3|LGI1|RAB26|LRRTM2|CACNG4|SYT12|CNTN4|MIR142	GRI-MGI_up
GO Biological Processes	GO:1901137	carbohydrate derivative biosynthetic process	-2.1	1.6	31	ASGR2|ATP5PO|BMPR1B|DCN|DHODH|EXT1|GART|GPI|LFNG|LUM|PFKFB3|PFKL|SOAT1|MOGS|NUP155|MAN1A2|KERA|NUP42|SCCPDH|UBE2J1|CHST12|CHST7|PRTFDC1|POGLUT1|MAN1C1|LMF1|ADPGK|ACSS1|GAL3ST3|CHST13|JMJD8	GRI-MGI_up
GO Biological Processes	GO:0051402	neuron apoptotic process	-2.1	2.2	13	GDNF|HMOX1|KCNB1|PIK3CA|POU4F1|ITSN1|SIX1|STAR|TNF|SYNGAP1|AIFM1|FAM162A|SIX4	GRI-MGI_up
GO Biological Processes	GO:0043038	amino acid activation	-2.1	4.1	5	KARS1|AIMP2|RARS2|MARS2|TARSL2	GRI-MGI_up
GO Biological Processes	GO:0040008	regulation of growth	-2.1	1.6	28	AVP|DRD2|E4F1|NOTCH1|PIK3CA|RBP4|SIX1|WRN|DDX39B|COLQ|LGI1|BCAR1|IST1|CCDC85B|NIPBL|HTRA2|LAMTOR2|TFCP2L1|PRLH|ZNF639|PLCE1|SIX4|LAMTOR1|SEMA6A|PAPPA2|ADIPOR2|TMC8|BRAT1	GRI-MGI_up
GO Biological Processes	GO:0018209	peptidyl-serine modification	-2.1	2	16	GRK2|AVP|DCN|DYRK1A|PDE4D|PIK3CA|PKD1|TNF|ULK1|BAG4|LMTK2|TERF2IP|POGLUT1|SMYD3|FNIP1|SBK1	GRI-MGI_up
GO Biological Processes	GO:0007409	axonogenesis	-2.1	1.8	21	BMPR1B|CHN1|DOK1|DRD2|EXT1|GDNF|GRB10|ITGA4|NOTCH1|PIK3CA|POU4F1|PTPRA|SPTA1|ULK1|SYNGAP1|LGI1|IST1|MYCBP2|SEMA6A|TCTN1|CNTN4	GRI-MGI_up
GO Biological Processes	GO:0060048	cardiac muscle contraction	-2.1	2.6	9	GRK2|ATP2A1|MYL3|PDE4B|PDE4D|PIK3CA|MAP2K6|NUP155|ACE2	GRI-MGI_up
GO Biological Processes	GO:0031960	response to corticosteroid	-2.1	2.5	10	AIF1|EIF4EBP1|NOTCH1|OXT|STAR|TNF|FOSL1|AIFM1|SMYD3|FBXO32	GRI-MGI_up
GO Biological Processes	GO:0007517	muscle organ development	-2.1	1.9	19	CHRNA1|DCN|EGR1|FLNB|MYL3|NOTCH1|POU4F1|RBP4|SIX1|DDX39B|SGCE|CACNA1H|FOXH1|P2RX2|SIX4|SELENON|POPDC2|DISP1|LEMD2	GRI-MGI_up
GO Biological Processes	GO:0030003	cellular cation homeostasis	-2.1	1.7	27	ABL2|ATP2A1|ATP6V1E1|AVP|CD19|DMXL1|DRD2|EDNRB|HMOX1|ITPR3|OXT|PDE4D|PKD1|PLCG2|PTH1R|SLC8A3|TRPM2|TSPOAP1|ABCG2|RASA3|P2RX2|PLCE1|SLC39A4|SELENON|SLC4A11|SLC9A7|SLC35G1	GRI-MGI_up
GO Cellular Components	GO:0035579	specific granule membrane	-2.1	3.1	7	STK10|TRPM2|TOM1|TMC6|LAMTOR2|LAMTOR1|HVCN1	GRI-MGI_up
GO Cellular Components	GO:0005764	lysosome	-2.1	1.6	28	AP1G1|ATP6V1E1|CLCN7|CTSW|CYB561|DCN|ACE|LUM|MNDA|MPO|PYGB|TRPM2|TSC2|CST7|IST1|TOM1|KERA|ABCA5|BRI3|TECPR1|LAMTOR2|TMEM106B|LAMTOR1|RRAGD|GNB4|SPNS1|WDR24|DTX3L	GRI-MGI_up
GO Cellular Components	GO:1902495	transmembrane transporter complex	-2.1	2	16	ATP2A1|CACNG1|CHRNA1|GABRR2|KCNB1|PDE4B|PDE4D|PKD1|CACNA1H|ABHD12|CACNG4|KCNMB3|LRRC7|CATSPERB|TTYH3|CATSPER1	GRI-MGI_up
GO Biological Processes	GO:0015931	nucleobase-containing compound transport	-2.1	2.2	13	DDX39B|SRSF11|NUP155|SLC35A1|IGF2BP2|RNPS1|NUP42|AHCTF1|SENP2|RBM26|UPF3A|LTV1|RFTN2	GRI-MGI_up
KEGG Pathway	hsa04210	Apoptosis	-2.1	2.6	9	CTSW|ITPR3|LMNA|PIK3CA|SPTA1|TNF|AIFM1|HTRA2|TUBA8	GRI-MGI_up
GO Biological Processes	GO:0009154	purine ribonucleotide catabolic process	-2.1	5	4	ITPA|PDE4B|PDE4D|PRTFDC1	GRI-MGI_up
GO Cellular Components	GO:0005773	vacuole	-2.1	1.6	31	AP1G1|ATP6V1E1|CLCN7|CTSW|CYB561|DCN|ACE|LUM|MNDA|MPO|PYGB|TRPM2|TSC2|ULK1|CST7|IST1|TOM1|KERA|ABCA5|BRI3|TECPR1|LAMTOR2|TMEM106B|LAMTOR1|UBQLN4|RRAGD|GNB4|SPNS1|WDR24|LTV1|DTX3L	GRI-MGI_up
GO Cellular Components	GO:0000323	lytic vacuole	-2.1	1.6	28	AP1G1|ATP6V1E1|CLCN7|CTSW|CYB561|DCN|ACE|LUM|MNDA|MPO|PYGB|TRPM2|TSC2|CST7|IST1|TOM1|KERA|ABCA5|BRI3|TECPR1|LAMTOR2|TMEM106B|LAMTOR1|RRAGD|GNB4|SPNS1|WDR24|DTX3L	GRI-MGI_up
GO Biological Processes	GO:1903305	regulation of regulated secretory pathway	-2.1	2.5	10	ADORA2B|AP1G1|DRD2|HMOX1|IL4R|KCNB1|NOTCH1|CACNA1H|BAIAP3|SYT12	GRI-MGI_up
GO Biological Processes	GO:0060976	coronary vasculature development	-2.1	4	5	NOTCH1|SUFU|CPLANE1|DYNC2H1|SPRED1	GRI-MGI_up
GO Cellular Components	GO:0016282	eukaryotic 43S preinitiation complex	-2.1	7.1	3	EIF3B|EIF3H|EIF3M	GRI-MGI_up
GO Biological Processes	GO:0045324	late endosome to vacuole transport	-2.1	7.1	3	TMEM50B|VPS28|CHMP7	GRI-MGI_up
GO Biological Processes	GO:1901524	regulation of mitophagy	-2.1	7.1	3	TSC2|HTRA2|VPS13C	GRI-MGI_up
GO Cellular Components	GO:0005769	early endosome	-2.1	1.9	17	HSPD1|KIFC1|BAIAP3|ZFYVE16|TOM1|GPNMB|ENTR1|LMTK2|LDLRAP1|SNX8|RHOD|VPS28|RAB17|RABEP2|SYNDIG1|DTX3L|CCDC154	GRI-MGI_up
GO Biological Processes	GO:0043647	inositol phosphate metabolic process	-2.1	3.4	6	INPPL1|PLCG2|PTH1R|PLCE1|INPP5E|IP6K3	GRI-MGI_up
GO Cellular Components	GO:0005774	vacuolar membrane	-2.1	1.8	19	AP1G1|ATP6V1E1|CLCN7|CYB561|TRPM2|ULK1|TOM1|ABCA5|BRI3|TECPR1|LAMTOR2|TMEM106B|LAMTOR1|RRAGD|GNB4|SPNS1|WDR24|LTV1|DTX3L	GRI-MGI_up
GO Molecular Functions	GO:0003743	translation initiation factor activity	-2.1	3.9	5	EIF3B|EIF3H|EIF3M|EIF1AD|EIF4E3	GRI-MGI_up
GO Biological Processes	GO:0042594	response to starvation	-2.1	2.3	11	DHODH|EIF4EBP1|WRN|ULK1|EIF2AK1|SESN1|SLC39A4|RRAGD|WDR24|FNIP1|BHLHA15	GRI-MGI_up
GO Biological Processes	GO:0009261	ribonucleotide catabolic process	-2.1	4.9	4	ITPA|PDE4B|PDE4D|PRTFDC1	GRI-MGI_up
GO Biological Processes	GO:0040001	establishment of mitotic spindle localization	-2.1	4.9	4	NUMA1|ARHGEF2|ACTR1A|CLASP1	GRI-MGI_up
GO Biological Processes	GO:0019058	viral life cycle	-2	1.9	16	GRK2|CD80|KPNA1|NOTCH1|STAU1|TNF|BANF1|NUP155|IST1|NUP42|VPS28|ZNF639|HACD3|ACE2|TRIM8|CHMP7	GRI-MGI_up
KEGG Pathway	hsa04141	Protein processing in endoplasmic reticulum	-2	2.4	10	SSR2|MOGS|STUB1|SEC23B|MAN1A2|EIF2AK1|UBE2J1|UBQLN4|MAN1C1|SIL1	GRI-MGI_up
GO Biological Processes	GO:0010508	positive regulation of autophagy	-2	2.7	8	DCN|HMOX1|TSC2|ULK1|GPSM1|SESN1|VPS13C|TRIM8	GRI-MGI_up
GO Biological Processes	GO:0120039	plasma membrane bounded cell projection morphogenesis	-2	1.6	27	BMPR1B|CFL1|CHN1|DOK1|DRD2|EXT1|GDNF|GRB10|TLX2|ITGA4|NOTCH1|PIK3CA|POU4F1|PTPRA|SPTA1|ULK1|SYNGAP1|LGI1|LZTS3|IST1|MYCBP2|NGEF|TMEM106B|SEMA6A|TCTN1|STRADA|CNTN4	GRI-MGI_up
GO Biological Processes	GO:0044786	cell cycle DNA replication	-2	3.3	6	MCM5|POLE|GINS1|ORC3|DONSON|SENP2	GRI-MGI_up
GO Biological Processes	GO:0006029	proteoglycan metabolic process	-2	3	7	BMPR1B|DCN|EXT1|CHST12|CHST7|GAL3ST3|CHST13	GRI-MGI_up
GO Biological Processes	GO:0002699	positive regulation of immune effector process	-2	2.2	12	ADORA2B|AP1G1|CD80|DDX1|GPI|HMOX1|HSPD1|IL4R|KARS1|LTA|RBP4|TNF	GRI-MGI_up
GO Biological Processes	GO:0016311	dephosphorylation	-2	1.8	21	CDC25A|DRD2|INPPL1|PFKFB3|PPP1CC|PPP2R5A|PTPRA|TNF|BAG4|PHACTR2|LMTK2|FBXW11|INPP5E|PPM1H|RBM26|PLPP5|PPM1K|PPTC7|SPRED1|PGAM5|PGP	GRI-MGI_up
GO Biological Processes	GO:0006998	nuclear envelope organization	-2	3.9	5	LMNA|BANF1|NUP155|CHMP7|LEMD2	GRI-MGI_up
GO Biological Processes	GO:0072523	purine-containing compound catabolic process	-2	3.9	5	ITPA|PDE4B|PDE4D|NUDT15|PRTFDC1	GRI-MGI_up
GO Molecular Functions	GO:0016788	hydrolase activity, acting on ester bonds	-2	1.6	30	CDC25A|DDX1|HMOX1|NTHL1|PDE4B|PDE4D|PDE6C|PFKFB3|PLCG2|PMS2|POLE|PPP1CC|PPP2R5A|PTPRA|TSN|WRN|DDHD2|ABHD12|PLCE1|PLA1A|INPP5E|APMAP|PPM1H|MUS81|PLPP5|PPM1K|PPTC7|PGAM5|PGP|RNASEK	GRI-MGI_up
GO Cellular Components	GO:0000775	chromosome, centromeric region	-2	2.3	11	HELLS|PPP1CC|PPP2R5A|KAT2B|CFDP1|PDS5A|CLASP1|AHCTF1|ZNFX1|SGO1|MEIKIN	GRI-MGI_up
GO Molecular Functions	GO:0022843	voltage-gated cation channel activity	-2	2.5	9	CACNG1|KCNB1|KCNJ13|CACNA1H|TSPOAP1|CACNG4|KCNH6|HVCN1|CATSPER1	GRI-MGI_up
GO Biological Processes	GO:2000136	regulation of cell proliferation involved in heart morphogenesis	-2	6.7	3	NOTCH1|SIX1|MKS1	GRI-MGI_up
GO Biological Processes	GO:0007221	positive regulation of transcription of Notch receptor target	-2	6.7	3	NOTCH1|KAT2B|MAML3	GRI-MGI_up
GO Biological Processes	GO:0090196	regulation of chemokine secretion	-2	6.7	3	AIF1|IL4R|TNF	GRI-MGI_up
GO Biological Processes	GO:0072079	nephron tubule formation	-2	6.7	3	GDNF|SIX1|SIX4	GRI-MGI_up
GO Biological Processes	GO:1905276	regulation of epithelial tube formation	-2	6.7	3	GDNF|SIX1|SIX4	GRI-MGI_up
GO Biological Processes	GO:0031468	nuclear envelope reassembly	-2	6.7	3	LMNA|BANF1|CHMP7	GRI-MGI_up
GO Biological Processes	GO:0090190	positive regulation of branching involved in ureteric bud morphogenesis	-2	6.7	3	GDNF|SIX1|SIX4	GRI-MGI_up
GO Molecular Functions	GO:0070064	proline-rich region binding	-2	6.7	3	ITSN1|GIGYF2|BAIAP2L1	GRI-MGI_up
GO Cellular Components	GO:0070993	translation preinitiation complex	-2	6.7	3	EIF3B|EIF3H|EIF3M	GRI-MGI_up
GO Cellular Components	GO:0034703	cation channel complex	-2	2.2	12	ATP2A1|CACNG1|KCNB1|PDE4B|PDE4D|PKD1|CACNA1H|ABHD12|CACNG4|KCNMB3|CATSPERB|CATSPER1	GRI-MGI_up
GO Molecular Functions	GO:0016887	ATPase activity	-2	1.8	18	ATP2A1|ATP6V1E1|ATP5PO|HSPA9|HSPD1|KIFC1|MCM5|PMS2|WRN|DDX39B|KIF3B|ABCG2|ABCA5|ATAD2|CHTF18|DYNC2H1|CLPB|KIFC2	GRI-MGI_up
GO Cellular Components	GO:1990351	transporter complex	-2	1.9	16	ATP2A1|CACNG1|CHRNA1|GABRR2|KCNB1|PDE4B|PDE4D|PKD1|CACNA1H|ABHD12|CACNG4|KCNMB3|LRRC7|CATSPERB|TTYH3|CATSPER1	GRI-MGI_up
GO Biological Processes	GO:0051168	nuclear export	-2	2.3	11	HSPA9|PKD1|DDX39B|SRSF11|NUP155|RNPS1|NUP42|XPO6|RBM26|LTV1|STRADA	GRI-MGI_up
GO Biological Processes	GO:0043627	response to estrogen	-2	3.3	6	CTNNA1|HMOX1|IL4R|STAR|ASH2L|PELP1	GRI-MGI_up
GO Biological Processes	GO:0000281	mitotic cytokinesis	-2	3.3	6	CFL1|RTKN|SON|TTC19|CEP55|CHMP7	GRI-MGI_up
GO Biological Processes	GO:0048858	cell projection morphogenesis	-2	1.6	27	BMPR1B|CFL1|CHN1|DOK1|DRD2|EXT1|GDNF|GRB10|TLX2|ITGA4|NOTCH1|PIK3CA|POU4F1|PTPRA|SPTA1|ULK1|SYNGAP1|LGI1|LZTS3|IST1|MYCBP2|NGEF|TMEM106B|SEMA6A|TCTN1|STRADA|CNTN4	GRI-MGI_up
GO Biological Processes	GO:0006873	cellular ion homeostasis	-2	1.6	27	ABL2|ATP2A1|ATP6V1E1|AVP|CD19|DMXL1|DRD2|EDNRB|HMOX1|ITPR3|OXT|PDE4D|PKD1|PLCG2|PTH1R|SLC8A3|TRPM2|TSPOAP1|ABCG2|RASA3|P2RX2|PLCE1|SLC39A4|SELENON|SLC4A11|SLC9A7|SLC35G1	GRI-MGI_up
GO Biological Processes	GO:0032594	protein transport within lipid bilayer	-2	4.7	4	CACNG4|REEP2|LRRC7|GRIP2	GRI-MGI_up
GO Biological Processes	GO:0043276	anoikis	-2	4.7	4	NOTCH1|PIK3CA|TSC2|ANKRD13C	GRI-MGI_up
GO Biological Processes	GO:0002183	cytoplasmic translational initiation	-2	4.7	4	EIF4EBP1|EIF3B|EIF3H|EIF3M	GRI-MGI_up
GO Biological Processes	GO:0032892	positive regulation of organic acid transport	-2	4.7	4	AVP|OXT|MAP2K6|ACE2	GRI-MGI_up
GO Biological Processes	GO:0017157	regulation of exocytosis	-2	2.2	12	ADORA2B|AP1G1|DRD2|HMOX1|IL4R|KCNB1|NOTCH1|CACNA1H|BAIAP3|CLASP1|RAB26|SYT12	GRI-MGI_up
GO Molecular Functions	GO:0005096	GTPase activator activity	-2	2	14	ADPRH|CHML|CHN1|TSC2|SYNGAP1|SEC23B|RASA3|TBC1D12|HACD3|SMAP1|RABEP2|ARHGAP39|AGAP1|PGAM5	GRI-MGI_up
GO Biological Processes	GO:0061919	process utilizing autophagic mechanism	-6	2.4	36	CLTC|PLK3|EEF1A1|FOXO3|GFAP|HSP90AA1|FOXK2|PRKN|PSAP|UVRAG|IFT88|EIF4G3|MTMR3|USP10|TMEM59|FEZ2|TCIRG1|NOD1|PACS2|VPS41|PRKAG2|LARS1|VPS29|LAMTOR1|ATG2B|VPS35|PLEKHF1|VMP1|C19orf12|MTDH|TP53INP1|UBXN2A|SYNPO2|MAPK15|ATG9B|TMEM173	GRI-MGI_down
GO Biological Processes	GO:0006914	autophagy	-6	2.4	36	CLTC|PLK3|EEF1A1|FOXO3|GFAP|HSP90AA1|FOXK2|PRKN|PSAP|UVRAG|IFT88|EIF4G3|MTMR3|USP10|TMEM59|FEZ2|TCIRG1|NOD1|PACS2|VPS41|PRKAG2|LARS1|VPS29|LAMTOR1|ATG2B|VPS35|PLEKHF1|VMP1|C19orf12|MTDH|TP53INP1|UBXN2A|SYNPO2|MAPK15|ATG9B|TMEM173	GRI-MGI_down
GO Molecular Functions	GO:0030235	nitric-oxide synthase regulator activity	-6	21	5	ATP2B4|EGFR|ESR1|HSP90AA1|HSP90AB1	GRI-MGI_down
GO Biological Processes	GO:0007033	vacuole organization	-5.2	3.6	17	IFT88|MBTPS1|MTMR3|FEZ2|PACS2|VPS41|CLN6|LAMTOR1|ATG2B|LAPTM4B|VPS35|VMP1|TP53INP1|UBXN2A|SYNPO2|ATG9B|TMEM173	GRI-MGI_down
GO Biological Processes	GO:0010506	regulation of autophagy	-4.8	2.6	25	PLK3|EEF1A1|FOXO3|GFAP|FOXK2|PRKN|PSAP|UVRAG|IFT88|EIF4G3|MTMR3|USP10|TMEM59|FEZ2|NOD1|PRKAG2|LARS1|VPS29|LAMTOR1|VPS35|PLEKHF1|MTDH|TP53INP1|MAPK15|TMEM173	GRI-MGI_down
GO Biological Processes	GO:1990778	protein localization to cell periphery	-4.7	2.6	24	CLTC|EGFR|GPER1|HRAS|NSF|NUMA1|PLK1|PRKCE|PRKCI|RAB3A|CLIP1|S100A10|STX3|NUMB|LIN7A|ROCK2|TMEM59|PKP3|GGA2|PACS2|ADAM22|VPS35|PLEKHF1|CNST	GRI-MGI_down
GO Biological Processes	GO:0043161	proteasome-mediated ubiquitin-dependent protein catabolic process	-4.7	2.4	29	PLK3|HSP90AB1|PRKN|PLK1|RNF4|UBE3A|PIAS1|MTA1|RNF14|FBXW11|HSPBP1|ANAPC15|UBE2S|ANAPC7|ANKIB1|DNAJB12|RNF121|CCAR2|SMURF2|HECTD3|TBL1XR1|TMUB1|ZFAND2A|TMEM67|AGAP3|ANAPC16|UBXN2A|DNAJC18|NHLRC3	GRI-MGI_down
GO Biological Processes	GO:0044257	cellular protein catabolic process	-4.6	1.9	44	CLTC|PLK3|FAP|HSP90AA1|HSP90AB1|PRKN|PLK1|RNF4|UBE2D2|UBE3A|PIAS1|USP10|MTA1|TRIP12|RNF14|TCIRG1|ADRM1|FBXW11|HSPBP1|ANAPC15|UBE2S|ANAPC7|ANKIB1|DNAJB12|RNF121|LAPTM4B|VPS35|CCAR2|SMURF2|HECTD3|TBL1XR1|NDFIP1|TMUB1|USP42|ZFAND2A|TMEM67|AGAP3|ANAPC16|CACUL1|UBXN2A|DNAJC18|USP12|AFG1L|NHLRC3	GRI-MGI_down
GO Biological Processes	GO:0000959	mitochondrial RNA metabolic process	-4.5	6.3	8	FOXO3|GARS1|MTERF1|MTO1|TWNK|AARS2|TFB2M|EARS2	GRI-MGI_down
GO Biological Processes	GO:0006511	ubiquitin-dependent protein catabolic process	-4.4	2	37	PLK3|HSP90AB1|PRKN|PLK1|RNF4|UBE2D2|UBE3A|PIAS1|USP10|MTA1|TRIP12|RNF14|ADRM1|FBXW11|HSPBP1|ANAPC15|UBE2S|ANAPC7|ANKIB1|DNAJB12|RNF121|CCAR2|SMURF2|HECTD3|TBL1XR1|NDFIP1|TMUB1|USP42|ZFAND2A|TMEM67|AGAP3|ANAPC16|CACUL1|UBXN2A|DNAJC18|USP12|NHLRC3	GRI-MGI_down
GO Biological Processes	GO:0019941	modification-dependent protein catabolic process	-4.3	2	37	PLK3|HSP90AB1|PRKN|PLK1|RNF4|UBE2D2|UBE3A|PIAS1|USP10|MTA1|TRIP12|RNF14|ADRM1|FBXW11|HSPBP1|ANAPC15|UBE2S|ANAPC7|ANKIB1|DNAJB12|RNF121|CCAR2|SMURF2|HECTD3|TBL1XR1|NDFIP1|TMUB1|USP42|ZFAND2A|TMEM67|AGAP3|ANAPC16|CACUL1|UBXN2A|DNAJC18|USP12|NHLRC3	GRI-MGI_down
GO Biological Processes	GO:0120193	tight junction organization	-4.2	5.1	9	PECAM1|PRKCI|TBCD|WNT11|CLDN9|ROCK2|PATJ|MTDH|OCLN	GRI-MGI_down
GO Biological Processes	GO:0043039	tRNA aminoacylation	-4.2	5.7	8	GARS1|VARS|WARS1|AIMP2|LARS1|QRSL1|AARS2|EARS2	GRI-MGI_down
GO Biological Processes	GO:0061684	chaperone-mediated autophagy	-4.1	11	5	PLK3|EEF1A1|GFAP|HSP90AA1|SYNPO2	GRI-MGI_down
GO Biological Processes	GO:0043632	modification-dependent macromolecule catabolic process	-4.1	2	37	PLK3|HSP90AB1|PRKN|PLK1|RNF4|UBE2D2|UBE3A|PIAS1|USP10|MTA1|TRIP12|RNF14|ADRM1|FBXW11|HSPBP1|ANAPC15|UBE2S|ANAPC7|ANKIB1|DNAJB12|RNF121|CCAR2|SMURF2|HECTD3|TBL1XR1|NDFIP1|TMUB1|USP42|ZFAND2A|TMEM67|AGAP3|ANAPC16|CACUL1|UBXN2A|DNAJC18|USP12|NHLRC3	GRI-MGI_down
GO Biological Processes	GO:0043038	amino acid activation	-4.1	5.6	8	GARS1|VARS|WARS1|AIMP2|LARS1|QRSL1|AARS2|EARS2	GRI-MGI_down
GO Biological Processes	GO:0000045	autophagosome assembly	-4.1	4	11	IFT88|MTMR3|FEZ2|PACS2|ATG2B|VMP1|TP53INP1|UBXN2A|SYNPO2|ATG9B|TMEM173	GRI-MGI_down
GO Molecular Functions	GO:0016887	ATPase activity	-4	2.3	26	ATP2A2|ATP2B4|DYNC1H1|BPTF|HSPA1L|HSP90AA1|HSP90AB1|NSF|PEX1|PMS1|PMS2|TOP2B|TCIRG1|ABCA9|ABCA8|KIF2C|ABCB8|ABCA6|ATAD2B|WRNIP1|ATP13A1|YTHDC2|ATAD5|KATNAL1|KIF18B|AFG1L	GRI-MGI_down
GO Molecular Functions	GO:0042623	ATPase activity, coupled	-3.9	2.5	21	ATP2A2|ATP2B4|DYNC1H1|BPTF|HSPA1L|HSP90AA1|HSP90AB1|NSF|PEX1|TOP2B|TCIRG1|ABCA9|ABCA8|ABCB8|ABCA6|WRNIP1|ATP13A1|YTHDC2|ATAD5|KATNAL1|KIF18B	GRI-MGI_down
GO Biological Processes	GO:0031396	regulation of protein ubiquitination	-3.9	2.8	17	ADGRB1|HSP90AA1|HSP90AB1|PRKN|PLK1|PRKCE|UBE3A|AIMP2|MTA1|TRIP12|PDCD6|FEM1B|HSPBP1|UBE2S|NXN|NDFIP1|UBXN2A	GRI-MGI_down
GO Biological Processes	GO:1905037	autophagosome organization	-3.9	3.9	11	IFT88|MTMR3|FEZ2|PACS2|ATG2B|VMP1|TP53INP1|UBXN2A|SYNPO2|ATG9B|TMEM173	GRI-MGI_down
GO Molecular Functions	GO:0004674	protein serine/threonine kinase activity	-3.9	2.2	28	CDK6|PLK3|EGFR|GRK5|PAK2|CDK14|PHKA1|PHKG1|PLK1|PRKCE|PRKCI|STK3|STK10|PKMYT1|ROCK2|TESK2|ERN2|FASTK|MAST3|MAST2|PASK|EIF2AK1|PRKAG2|MAP3K19|TSSK6|BRSK1|MAPK15|PIM3	GRI-MGI_down
GO Biological Processes	GO:1904375	regulation of protein localization to cell periphery	-3.8	3.6	12	CLTC|EGFR|GPER1|HRAS|NUMA1|PLK1|PRKCE|PRKCI|STX3|NUMB|TMEM59|CNST	GRI-MGI_down
GO Biological Processes	GO:0034330	cell junction organization	-3.8	2.5	21	PECAM1|PRKCI|PTPRJ|S100A10|SLC9A1|TBCD|TRIP6|WNT11|NUMB|CLDN6|CLDN9|ROCK2|IQSEC1|GJC1|PATJ|TESK2|PKP3|LIMS2|VMP1|MTDH|OCLN	GRI-MGI_down
GO Biological Processes	GO:0009896	positive regulation of catabolic process	-3.8	2.2	27	PLK3|FOXO3|HSP90AA1|NSF|PRKN|PLK1|PRKCE|SCT|UVRAG|PIAS1|ROCK2|TMEM59|RNF14|NOD1|HSPBP1|NDUFA13|ANKIB1|VPS35|VSIR|SMURF2|PLEKHF1|ZFAND2A|MTDH|TP53INP1|TMEM173|NANOS1|MIR210	GRI-MGI_down
GO Biological Processes	GO:1903320	regulation of protein modification by small protein conjugation or removal	-3.8	2.7	18	ADGRB1|HSP90AA1|HSP90AB1|PRKN|PLK1|PRKCE|UBE3A|AIMP2|PIAS1|MTA1|TRIP12|PDCD6|FEM1B|HSPBP1|UBE2S|NXN|NDFIP1|UBXN2A	GRI-MGI_down
GO Biological Processes	GO:0034755	iron ion transmembrane transport	-3.8	9	5	SLC39A14|SLC40A1|TTYH1|STEAP4|MIR210	GRI-MGI_down
GO Biological Processes	GO:0070830	bicellular tight junction assembly	-3.7	5	8	PECAM1|PRKCI|TBCD|WNT11|ROCK2|PATJ|MTDH|OCLN	GRI-MGI_down
GO Biological Processes	GO:0010498	proteasomal protein catabolic process	-3.7	2.1	29	PLK3|HSP90AB1|PRKN|PLK1|RNF4|UBE3A|PIAS1|MTA1|RNF14|FBXW11|HSPBP1|ANAPC15|UBE2S|ANAPC7|ANKIB1|DNAJB12|RNF121|CCAR2|SMURF2|HECTD3|TBL1XR1|TMUB1|ZFAND2A|TMEM67|AGAP3|ANAPC16|UBXN2A|DNAJC18|NHLRC3	GRI-MGI_down
GO Biological Processes	GO:0120192	tight junction assembly	-3.7	4.9	8	PECAM1|PRKCI|TBCD|WNT11|ROCK2|PATJ|MTDH|OCLN	GRI-MGI_down
GO Biological Processes	GO:1905832	positive regulation of spindle assembly	-3.6	20	3	DYNC1H1|NUMA1|MAPK15	GRI-MGI_down
GO Biological Processes	GO:0007005	mitochondrion organization	-3.6	2	31	NIPSNAP2|GPER1|HSPA1L|HSP90AA1|NDUFAB1|NDUFV1|NDUFS4|NDUFS8|NOS3|PRKN|RAB3A|SLC9A1|SPG7|ZNF205|MTERF1|PRDX3|POLG2|ACAD9|NDUFA13|ATG2B|VPS35|TWNK|AARS2|CCAR2|TFB2M|MAIP1|COX19|NDUFAF2|MTFR2|AFG1L|ATG9B	GRI-MGI_down
GO Biological Processes	GO:0055065	metal ion homeostasis	-3.6	1.9	36	ADRA1B|ATP2A2|ATP2B4|BDKRB1|EGFR|EPO|ESR1|GNA15|GPR12|GPR17|GPER1|ITGAV|NTSR1|PRKN|PRKCE|SLC9A1|SRI|S1PR4|LPAR2|TCIRG1|TRDN|MICU1|SLC30A9|SLC39A14|STEAP1|EIF2AK1|SLC40A1|SLC12A9|ATP13A1|CDH23|MAIP1|STEAP4|NDFIP1|C19orf12|COX19|NPSR1	GRI-MGI_down
GO Molecular Functions	GO:0140101	catalytic activity, acting on a tRNA	-3.6	3.4	12	GARS1|VARS|WARS1|POP7|POP4|NT5C3A|LARS1|PTRH2|QRSL1|AARS2|EARS2|TYW5	GRI-MGI_down
GO Biological Processes	GO:0032886	regulation of microtubule-based process	-3.6	2.7	17	CLTC|DYNC1H1|TRIM37|NUMA1|PLK1|RNF4|CLIP1|TBCD|RASSF7|ROCK2|AKAP9|CDK2AP2|TMEM67|BORCS5|DNAAF1|MAPK15|SKA2	GRI-MGI_down
GO Molecular Functions	GO:0016651	oxidoreductase activity, acting on NAD(P)H	-3.5	3.5	11	NDUFAB1|NDUFV1|NDUFS4|NDUFS8|NQO2|NOS3|TP53I3|PRDX3|NDUFA13|NXN|NDUFAF2	GRI-MGI_down
GO Biological Processes	GO:0006418	tRNA aminoacylation for protein translation	-3.5	5.3	7	GARS1|VARS|WARS1|AIMP2|LARS1|AARS2|EARS2	GRI-MGI_down
GO Molecular Functions	GO:0016655	oxidoreductase activity, acting on NAD(P)H, quinone or similar compound as acceptor	-3.5	4.5	8	NDUFAB1|NDUFV1|NDUFS4|NDUFS8|NQO2|TP53I3|NDUFA13|NDUFAF2	GRI-MGI_down
GO Biological Processes	GO:0051603	proteolysis involved in cellular protein catabolic process	-3.4	1.8	38	PLK3|FAP|HSP90AB1|PRKN|PLK1|RNF4|UBE2D2|UBE3A|PIAS1|USP10|MTA1|TRIP12|RNF14|ADRM1|FBXW11|HSPBP1|ANAPC15|UBE2S|ANAPC7|ANKIB1|DNAJB12|RNF121|CCAR2|SMURF2|HECTD3|TBL1XR1|NDFIP1|TMUB1|USP42|ZFAND2A|TMEM67|AGAP3|ANAPC16|CACUL1|UBXN2A|DNAJC18|USP12|NHLRC3	GRI-MGI_down
GO Biological Processes	GO:0070507	regulation of microtubule cytoskeleton organization	-3.4	2.8	15	CLTC|DYNC1H1|TRIM37|NUMA1|PLK1|RNF4|CLIP1|TBCD|RASSF7|ROCK2|AKAP9|CDK2AP2|TMEM67|MAPK15|SKA2	GRI-MGI_down
GO Biological Processes	GO:0022900	electron transport chain	-3.4	2.8	15	IDO1|NDUFAB1|NDUFV1|NDUFS4|NDUFS8|NQO2|TSTA3|UQCRFS1|AKR1A1|POLG2|NDUFA13|STEAP4|NDUFAF2|AFG1L|MIR210	GRI-MGI_down
GO Biological Processes	GO:0042176	regulation of protein catabolic process	-3.4	2.1	24	ADGRB1|PLK3|CYP51A1|EEF1A1|EGFR|GFAP|HSP90AA1|HSP90AB1|NSF|PRKN|PLK1|UBE3A|PIAS1|RNF14|HSPBP1|NDUFA13|ANKIB1|BANP|LAPTM4B|VPS35|CCAR2|SMURF2|ZFAND2A|UBXN2A	GRI-MGI_down
GO Biological Processes	GO:0072657	protein localization to membrane	-3.4	1.9	34	CLTC|EGFR|GPER1|HRAS|HSP90AA1|NSF|PRKN|PRKCE|PRKCI|RAB3A|RPL13|RPL21|RPL28|RPS8|RPS21|CLIP1|S100A10|SRP9|STX3|GET1|NUMB|LIN7A|ROCK2|TMEM59|PKP3|GGA2|PACS2|NDUFA13|ADAM22|VPS35|PLEKHF1|MAIP1|CNST|SHISA7	GRI-MGI_down
GO Biological Processes	GO:0000041	transition metal ion transport	-3.3	3.4	11	CLTC|CBLIF|TCN1|TCIRG1|SLC30A9|SLC39A14|SLC40A1|ATP13A1|TTYH1|STEAP4|MIR210	GRI-MGI_down
GO Biological Processes	GO:0051181	cofactor transport	-3.3	5	7	CBLIF|TCN1|ASIC3|SLC23A1|SLC44A4|SLC25A29|SLC25A47	GRI-MGI_down
GO Biological Processes	GO:0060022	hard palate development	-3.3	17	3	FZD2|FZD1|MMP25	GRI-MGI_down
GO Cellular Components	GO:0045177	apical part of cell	-3.3	2.1	24	EGFR|SLC29A1|FAP|FAT1|CBLIF|HSP90AB1|MYO7B|PCM1|PRKCI|SLC4A2|SLC9A1|STX3|SLC7A5|NUMB|SLC23A1|PATJ|TCIRG1|AKR1A1|NOD1|CDHR5|SLC44A4|MTDH|PLET1|OCLN	GRI-MGI_down
GO Biological Processes	GO:0055080	cation homeostasis	-3.3	1.8	38	ADRA1B|ATP2A2|ATP2B4|BDKRB1|EGFR|EPO|ESR1|GNA15|GPR12|GPR17|GPER1|ITGAV|NTSR1|PRKN|PRKCE|SLC4A2|SLC9A1|SRI|S1PR4|LPAR2|TCIRG1|TRDN|MICU1|SLC30A9|SLC39A14|STEAP1|EIF2AK1|SLC40A1|CLN6|SLC12A9|ATP13A1|CDH23|MAIP1|STEAP4|NDFIP1|C19orf12|COX19|NPSR1	GRI-MGI_down
GO Cellular Components	GO:0097223	sperm part	-3.3	2.7	15	ATP2B4|HSP90AB1|RAB3A|SKIL|IFT88|CAPN11|FNDC3A|ARC|NME8|CFAP69|PACRG|TMEM190|TCTE1|TCTEX1D4|TEX22	GRI-MGI_down
GO Biological Processes	GO:0043297	apical junction assembly	-3.3	4.3	8	PECAM1|PRKCI|TBCD|WNT11|ROCK2|PATJ|MTDH|OCLN	GRI-MGI_down
GO Biological Processes	GO:0098771	inorganic ion homeostasis	-3.2	1.7	38	ADRA1B|ATP2A2|ATP2B4|BDKRB1|EGFR|EPO|ESR1|GNA15|GPR12|GPR17|GPER1|ITGAV|NTSR1|PRKN|PRKCE|SLC4A2|SLC9A1|SRI|S1PR4|LPAR2|TCIRG1|TRDN|MICU1|SLC30A9|SLC39A14|STEAP1|EIF2AK1|SLC40A1|CLN6|SLC12A9|ATP13A1|CDH23|MAIP1|STEAP4|NDFIP1|C19orf12|COX19|NPSR1	GRI-MGI_down
GO Biological Processes	GO:0045216	cell-cell junction organization	-3.1	2.8	13	PECAM1|PRKCI|TBCD|WNT11|CLDN6|CLDN9|ROCK2|GJC1|PATJ|PKP3|LIMS2|MTDH|OCLN	GRI-MGI_down
GO Biological Processes	GO:0006390	mitochondrial transcription	-3.1	9.1	4	FOXO3|MTERF1|TWNK|TFB2M	GRI-MGI_down
GO Biological Processes	GO:0072593	reactive oxygen species metabolic process	-3.1	2.3	19	ATP2B4|ADGRB1|EGFR|FOXO3|HSP90AA1|HSP90AB1|NDUFS4|NQO2|NOS3|PRDX1|PRKN|ZNF205|ROCK2|PRDX3|DDAH2|NDUFA13|DDIT4|BCO2|NDUFAF2	GRI-MGI_down
GO Biological Processes	GO:0072659	protein localization to plasma membrane	-3.1	2.3	18	CLTC|EGFR|GPER1|NSF|PRKCE|PRKCI|RAB3A|S100A10|STX3|NUMB|ROCK2|TMEM59|PKP3|GGA2|PACS2|VPS35|PLEKHF1|CNST	GRI-MGI_down
GO Biological Processes	GO:0034329	cell junction assembly	-3.1	2.4	17	PECAM1|PRKCI|PTPRJ|S100A10|SLC9A1|TBCD|TRIP6|WNT11|ROCK2|GJC1|PATJ|TESK2|PKP3|LIMS2|VMP1|MTDH|OCLN	GRI-MGI_down
GO Biological Processes	GO:0086036	regulation of cardiac muscle cell membrane potential	-3.1	15	3	ATP2A2|SLC9A1|TRDN	GRI-MGI_down
GO Biological Processes	GO:0070127	tRNA aminoacylation for mitochondrial protein translation	-3.1	15	3	GARS1|AARS2|EARS2	GRI-MGI_down
GO Biological Processes	GO:0097435	supramolecular fiber organization	-3.1	1.8	35	CAPZA2|PLK3|DIAPH2|DYNC1H1|FAT1|GFAP|HSP90AB1|NUMA1|PRKN|PCM1|PRKCE|PRKCI|CLIP1|S100A10|SLC9A1|TBCD|COL14A1|WNT11|ROCK2|ARPC3|AKAP9|SORBS3|TRDN|WASF3|KIF2C|ENAH|BIN3|KATNAL1|MYPN|KIF18B|CDC42EP5|KANK4|SYNPO2|RFLNB|PFN4	GRI-MGI_down
GO Molecular Functions	GO:0016491	oxidoreductase activity	-3.1	1.7	38	ALDH3B2|CYP51A1|DIO1|IDO1|NDUFAB1|NDUFV1|NDUFS4|NDUFS8|NQO2|NOS3|PRDX1|PAM|PCBD1|RPE65|TSTA3|UQCRFS1|TP53I3|AKR1A1|IFI30|ME3|PRDX3|MMACHC|STEAP1|ACAD9|NDUFA13|CYP2W1|NXN|PYCR3|STEAP4|RIOX1|HSDL1|BCO2|RTN4IP1|NDUFAF2|DEGS2|TYW5|IDO2|FRRS1	GRI-MGI_down
GO Cellular Components	GO:0005773	vacuole	-3	1.7	39	ASAH1|CLTC|DYNC1H1|EEF1A1|GFAP|CBLIF|GNA11|HSP90AA1|HSP90AB1|NEU1|NSF|PSAP|RAB3A|STX3|UVRAG|CST7|TMEM59|CALCRL|TCIRG1|IFI30|CCT2|GCA|SLC17A5|VPS41|LARS1|LAMTOR1|LAPTM4B|VPS35|SLC7A14|PLEKHF1|UNC93B1|VMP1|TP53INP1|BORCS5|MAPK15|MILR1|ATG9B|TMEM173|NHLRC3	GRI-MGI_down
GO Biological Processes	GO:0039528	cytoplasmic pattern recognition receptor signaling pathway in response to virus	-3	6.3	5	IRF7|ANKRD17|GPATCH3|IFIH1|TMEM173	GRI-MGI_down
GO Biological Processes	GO:0051281	positive regulation of release of sequestered calcium ion into cytosol	-3	5.1	6	BDKRB1|GPER1|NTSR1|SRI|TRDN|NPSR1	GRI-MGI_down
GO Biological Processes	GO:1904427	positive regulation of calcium ion transmembrane transport	-3	3.8	8	BDKRB1|NIPSNAP2|GPER1|NTSR1|SLC9A1|SRI|TRDN|NPSR1	GRI-MGI_down
GO Molecular Functions	GO:0004812	aminoacyl-tRNA ligase activity	-2.9	5	6	GARS1|VARS|WARS1|LARS1|AARS2|EARS2	GRI-MGI_down
GO Molecular Functions	GO:0016875	ligase activity, forming carbon-oxygen bonds	-2.9	5	6	GARS1|VARS|WARS1|LARS1|AARS2|EARS2	GRI-MGI_down
GO Biological Processes	GO:0051493	regulation of cytoskeleton organization	-2.9	1.9	29	CAPZA2|CLTC|DYNC1H1|HRAS|TRIM37|NUMA1|PAM|PRKN|PLK1|PRKCE|RNF4|CLIP1|S100A10|SLC9A1|TBCD|WNT11|RASSF7|ROCK2|ARPC3|AKAP9|SORBS3|CDK2AP2|TMEM67|CDC42EP5|KANK4|SYNPO2|MAPK15|SKA2|PFN4	GRI-MGI_down
GO Biological Processes	GO:1904714	regulation of chaperone-mediated autophagy	-2.9	13	3	PLK3|EEF1A1|GFAP	GRI-MGI_down
GO Molecular Functions	GO:0016723	oxidoreductase activity, oxidizing metal ions, NAD or NADP as acceptor	-2.9	13	3	MMACHC|STEAP4|FRRS1	GRI-MGI_down
GO Biological Processes	GO:0085020	protein K6-linked ubiquitination	-2.9	13	3	PRKN|RNF4|UBE2S	GRI-MGI_down
GO Biological Processes	GO:0048511	rhythmic process	-2.9	2.2	19	DDX5|EGFR|ESR1|FOXO3|GNA11|MTNR1A|NOS3|PAM|RPE65|UBE3A|FZD4|NR0B2|SGPL1|MTA1|ROCK2|SETX|FBXW11|CCAR2|ATOH7	GRI-MGI_down
GO Cellular Components	GO:0016324	apical plasma membrane	-2.9	2.1	20	EGFR|SLC29A1|FAT1|CBLIF|HSP90AB1|PRKCI|SLC4A2|SLC9A1|STX3|SLC7A5|SLC23A1|PATJ|TCIRG1|AKR1A1|NOD1|CDHR5|SLC44A4|MTDH|PLET1|OCLN	GRI-MGI_down
GO Biological Processes	GO:0072507	divalent inorganic cation homeostasis	-2.9	1.9	28	ADRA1B|ATP2A2|ATP2B4|BDKRB1|EGFR|EPO|ESR1|GNA15|GPR12|GPR17|GPER1|ITGAV|NTSR1|PRKN|PRKCE|SRI|S1PR4|LPAR2|TCIRG1|TRDN|MICU1|SLC30A9|SLC39A14|ATP13A1|CDH23|MAIP1|C19orf12|NPSR1	GRI-MGI_down
GO Biological Processes	GO:0090169	regulation of spindle assembly	-2.9	5.9	5	DYNC1H1|NUMA1|PLK1|RNF4|MAPK15	GRI-MGI_down
GO Biological Processes	GO:0051602	response to electrical stimulus	-2.8	4.8	6	EPO|RAB3A|RPE65|SLC9A1|AKAP9|BRD1	GRI-MGI_down
GO Biological Processes	GO:0010863	positive regulation of phospholipase C activity	-2.8	4.8	6	EGFR|ESR1|GNA15|HRAS|S1PR4|LPAR2	GRI-MGI_down
GO Biological Processes	GO:0090224	regulation of spindle organization	-2.8	4.8	6	CLTC|DYNC1H1|NUMA1|PLK1|RNF4|MAPK15	GRI-MGI_down
GO Cellular Components	GO:0005759	mitochondrial matrix	-2.8	1.9	26	CA5A|FOXO3|GARS1|HSPA1L|NDUFAB1|NDUFS8|MTERF1|ME3|FASTK|PRDX3|POLG2|HIBCH|PDP1|MRPL16|MRM3|TWNK|CCAR2|TFB2M|MAIP1|BCO2|ACSS1|MRPL43|MPV17L2|EARS2|PPTC7|THEM5	GRI-MGI_down
GO Biological Processes	GO:0070979	protein K11-linked ubiquitination	-2.8	5.7	5	PRKN|RNF4|UBE2D2|UBE2S|ANAPC7	GRI-MGI_down
Hallmark Gene Sets	M5948	HALLMARK BILE ACID METABOLISM	-2.8	3	10	DIO1|SLC29A1|PEX1|NR0B2|SLC23A1|ABCA9|ABCA8|ABCA6|PNPLA8|SLC35B2	GRI-MGI_down
GO Biological Processes	GO:0051301	cell division	-2.8	1.8	31	CCNT2|CDK6|CLTC|PLK3|DYNC1H1|NAP1L2|NUMA1|CDK14|PLK1|PRKCE|UVRAG|NUMB|CCNE2|ROCK2|CDK2AP2|NUDC|KIF2C|MAU2|ORC6|ANAPC15|UBE2S|ANAPC7|BIN3|CABLES2|LZTS2|CCDC124|ANAPC16|KDF1|KIF18B|SENP5|SKA2	GRI-MGI_down
GO Cellular Components	GO:0005912	adherens junction	-2.7	1.8	29	ATP2A2|ADGRB1|CLTC|EGFR|FAP|FAT1|FLNB|FZD2|ITGAV|PTPN12|RPS8|S100A11|SLC4A2|SLC9A1|TBCD|TRIP6|FZD1|NUMB|LIN7A|ARPC3|SORBS3|FRS2|PKP3|ITGA11|HACD3|AHI1|LIMS2|ENAH|SYNPO2	GRI-MGI_down
GO Biological Processes	GO:0042119	neutrophil activation	-2.7	1.8	27	AGL|ASAH1|DYNC1H1|EEF1A1|SERPINB1|HSP90AA1|HSP90AB1|IL18|ITGAV|LAIR1|NEU1|PECAM1|PSAP|PTPRJ|RAB3A|S100A11|STK10|TCN1|TCIRG1|CCT2|GCA|LAMTOR1|MMP25|GSDMD|CRISPLD2|TMEM173|NHLRC3	GRI-MGI_down
GO Molecular Functions	GO:0005381	iron ion transmembrane transporter activity	-2.7	11	3	SLC39A14|SLC40A1|TTYH1	GRI-MGI_down
GO Molecular Functions	GO:0008509	anion transmembrane transporter activity	-2.7	2.1	20	SLC4A2|SLC7A5|ASIC3|SLC23A1|SLC35A3|SLC17A5|SLCO4A1|SLC25A24|SLC12A9|TTYH1|TTYH3|SLC44A4|SFXN3|SLC37A3|SLC16A10|SLC25A29|SLC38A8|BEST4|ANO9|SLC35B2	GRI-MGI_down
GO Biological Processes	GO:1903076	regulation of protein localization to plasma membrane	-2.7	3.2	9	CLTC|EGFR|GPER1|PRKCE|PRKCI|STX3|NUMB|TMEM59|CNST	GRI-MGI_down
GO Molecular Functions	GO:1901505	carbohydrate derivative transmembrane transporter activity	-2.7	4.5	6	SLC29A1|SLC35A3|SLC17A5|SLC25A24|SLC37A3|SLC35B2	GRI-MGI_down
GO Molecular Functions	GO:0004672	protein kinase activity	-2.7	1.8	31	CDK6|PLK3|EGFR|EPHB4|GRK5|PAK2|CDK14|PHKA1|PHKG1|PLK1|PRKCE|PRKCI|STK3|STK10|PKMYT1|CCNE2|ROCK2|TESK2|ERN2|FASTK|MAST3|MAST2|PASK|EIF2AK1|CRIM1|PRKAG2|MAP3K19|TSSK6|BRSK1|MAPK15|PIM3	GRI-MGI_down
GO Biological Processes	GO:0001505	regulation of neurotransmitter levels	-2.7	2	21	ACHE|APBA1|ATP2A2|ATP2B4|CHKA|SLC29A1|GPER1|HSP90AA1|HSP90AB1|NOS3|NTSR1|PRKN|RAB3A|STX3|LIN7A|ROCK2|SLC44A1|DDAH2|SLC44A4|BRSK1|LRTOMT	GRI-MGI_down
GO Biological Processes	GO:0042490	mechanoreceptor differentiation	-2.7	3.9	7	FZD2|POU4F3|IFT88|CDH23|SLC44A4|TMC1|LRTOMT	GRI-MGI_down
GO Biological Processes	GO:0033108	mitochondrial respiratory chain complex assembly	-2.7	3.2	9	NDUFAB1|NDUFV1|NDUFS4|NDUFS8|ACAD9|NDUFA13|AARS2|COX19|NDUFAF2	GRI-MGI_down
GO Biological Processes	GO:0006875	cellular metal ion homeostasis	-2.7	1.8	30	ADRA1B|ATP2A2|ATP2B4|BDKRB1|EPO|ESR1|GNA15|GPR12|GPR17|GPER1|ITGAV|NTSR1|PRKCE|SLC9A1|SRI|S1PR4|LPAR2|TCIRG1|TRDN|MICU1|SLC30A9|SLC39A14|SLC40A1|ATP13A1|CDH23|MAIP1|NDFIP1|C19orf12|COX19|NPSR1	GRI-MGI_down
GO Biological Processes	GO:0036230	granulocyte activation	-2.7	1.8	27	AGL|ASAH1|DYNC1H1|EEF1A1|SERPINB1|HSP90AA1|HSP90AB1|IL18|ITGAV|LAIR1|NEU1|PECAM1|PSAP|PTPRJ|RAB3A|S100A11|STK10|TCN1|TCIRG1|CCT2|GCA|LAMTOR1|MMP25|GSDMD|CRISPLD2|TMEM173|NHLRC3	GRI-MGI_down
GO Cellular Components	GO:0048471	perinuclear region of cytoplasm	-2.7	1.7	35	ACHE|APBA1|ATP2A2|ADGRB1|CCNT2|CDC5L|EGFR|FAT1|GPER1|HRAS|HSP90AA1|HSP90AB1|TRIM37|NFKBIE|PAK2|PAM|PRKN|PRKCE|RAB3A|SLC9A1|ASIC3|PATJ|RAB40B|ATXN10|PNPLA8|CABP2|VPS53|VPS35|WRNIP1|PLEKHF1|HECTD3|NDFIP1|MTDH|TMEM173|NANOS1	GRI-MGI_down
GO Cellular Components	GO:0005764	lysosome	-2.7	1.7	34	ASAH1|CLTC|DYNC1H1|EEF1A1|GFAP|CBLIF|GNA11|HSP90AA1|HSP90AB1|NEU1|NSF|PSAP|RAB3A|STX3|UVRAG|CST7|TMEM59|CALCRL|TCIRG1|IFI30|CCT2|GCA|SLC17A5|VPS41|LARS1|LAMTOR1|LAPTM4B|VPS35|SLC7A14|PLEKHF1|UNC93B1|BORCS5|MILR1|NHLRC3	GRI-MGI_down
GO Molecular Functions	GO:0003954	NADH dehydrogenase activity	-2.7	4.5	6	NDUFAB1|NDUFV1|NDUFS4|NDUFS8|NDUFA13|NDUFAF2	GRI-MGI_down
GO Molecular Functions	GO:0008137	NADH dehydrogenase (ubiquinone) activity	-2.7	4.5	6	NDUFAB1|NDUFV1|NDUFS4|NDUFS8|NDUFA13|NDUFAF2	GRI-MGI_down
GO Biological Processes	GO:0022602	ovulation cycle process	-2.7	4.5	6	ESR1|FOXO3|NOS3|PAM|FZD4|SGPL1	GRI-MGI_down
GO Molecular Functions	GO:0050136	NADH dehydrogenase (quinone) activity	-2.7	4.5	6	NDUFAB1|NDUFV1|NDUFS4|NDUFS8|NDUFA13|NDUFAF2	GRI-MGI_down
GO Biological Processes	GO:1900274	regulation of phospholipase C activity	-2.7	4.5	6	EGFR|ESR1|GNA15|HRAS|S1PR4|LPAR2	GRI-MGI_down
GO Cellular Components	GO:0000323	lytic vacuole	-2.7	1.7	34	ASAH1|CLTC|DYNC1H1|EEF1A1|GFAP|CBLIF|GNA11|HSP90AA1|HSP90AB1|NEU1|NSF|PSAP|RAB3A|STX3|UVRAG|CST7|TMEM59|CALCRL|TCIRG1|IFI30|CCT2|GCA|SLC17A5|VPS41|LARS1|LAMTOR1|LAPTM4B|VPS35|SLC7A14|PLEKHF1|UNC93B1|BORCS5|MILR1|NHLRC3	GRI-MGI_down
GO Biological Processes	GO:0098656	anion transmembrane transport	-2.6	2.1	18	NTSR1|SLC4A2|SLC9A1|SLC7A5|SLC23A1|SLC35A3|PRKAG2|SLC12A9|TTYH1|TTYH3|SLC44A4|SLC37A3|SLC16A10|SLC25A29|SLC38A8|BEST4|ANO9|SLC35B2	GRI-MGI_down
KEGG Pathway	hsa04915	Estrogen signaling pathway	-2.6	3.1	9	EGFR|ESR1|GPER1|HRAS|HSPA1L|HSP90AA1|HSP90AB1|NOS3|CALML4	GRI-MGI_down
GO Biological Processes	GO:0022904	respiratory electron transport chain	-2.6	2.9	10	NDUFAB1|NDUFV1|NDUFS4|NDUFS8|UQCRFS1|POLG2|NDUFA13|NDUFAF2|AFG1L|MIR210	GRI-MGI_down
GO Biological Processes	GO:0010508	positive regulation of autophagy	-2.6	2.9	10	PLK3|FOXO3|PRKN|UVRAG|TMEM59|NOD1|PLEKHF1|MTDH|TP53INP1|TMEM173	GRI-MGI_down
GO Biological Processes	GO:1901264	carbohydrate derivative transport	-2.6	3.4	8	SLC29A1|PRKCE|PSAP|SLC35A3|SLC17A5|SLC25A24|SLC37A3|SLC35B2	GRI-MGI_down
GO Biological Processes	GO:1904377	positive regulation of protein localization to cell periphery	-2.6	3.8	7	EGFR|GPER1|NUMA1|PRKCE|PRKCI|STX3|CNST	GRI-MGI_down
GO Cellular Components	GO:0005911	cell-cell junction	-2.6	1.9	25	ATP2A2|ADGRB1|FAT1|CLDN11|PECAM1|PRKCI|PTPRJ|S100A11|SLC9A1|STX3|TBCD|FZD4|LIN7A|CLDN6|CLDN9|GJC1|PATJ|FRS2|PKP3|STEAP1|AHI1|LIMS2|MTDH|MAPK15|OCLN	GRI-MGI_down
Hallmark Gene Sets	M5937	HALLMARK GLYCOLYSIS	-2.6	2.4	14	AGL|EGFR|NASP|PAM|TSTA3|CLDN9|GNPDA1|AKR1A1|CITED2|SLC35A3|DDIT4|CLN6|CHST12|DEPDC1	GRI-MGI_down
GO Cellular Components	GO:0035371	microtubule plus-end	-2.6	6.8	4	NUMA1|CLIP1|KIF2C|KIF18B	GRI-MGI_down
GO Biological Processes	GO:0010523	negative regulation of calcium ion transport into cytosol	-2.6	6.8	4	EPO|NTSR1|SRI|TRDN	GRI-MGI_down
GO Biological Processes	GO:0031331	positive regulation of cellular catabolic process	-2.6	2	21	PLK3|FOXO3|HSP90AA1|PRKN|PLK1|UVRAG|PIAS1|ROCK2|TMEM59|RNF14|NOD1|HSPBP1|ANKIB1|VPS35|PLEKHF1|ZFAND2A|MTDH|TP53INP1|TMEM173|NANOS1|MIR210	GRI-MGI_down
GO Biological Processes	GO:0043312	neutrophil degranulation	-2.6	1.8	26	AGL|ASAH1|DYNC1H1|EEF1A1|SERPINB1|HSP90AA1|HSP90AB1|ITGAV|LAIR1|NEU1|PECAM1|PSAP|PTPRJ|RAB3A|S100A11|STK10|TCN1|TCIRG1|CCT2|GCA|LAMTOR1|MMP25|GSDMD|CRISPLD2|TMEM173|NHLRC3	GRI-MGI_down
GO Molecular Functions	GO:0031419	cobalamin binding	-2.6	10	3	CBLIF|TCN1|MMACHC	GRI-MGI_down
GO Biological Processes	GO:0015801	aromatic amino acid transport	-2.6	10	3	SLC7A5|SLC16A10|SLC25A29	GRI-MGI_down
GO Biological Processes	GO:0039530	MDA-5 signaling pathway	-2.6	10	3	IRF7|ANKRD17|IFIH1	GRI-MGI_down
GO Biological Processes	GO:0032981	mitochondrial respiratory chain complex I assembly	-2.6	3.7	7	NDUFAB1|NDUFV1|NDUFS4|NDUFS8|ACAD9|NDUFA13|NDUFAF2	GRI-MGI_down
GO Biological Processes	GO:0006826	iron ion transport	-2.6	3.7	7	CLTC|TCIRG1|SLC39A14|SLC40A1|TTYH1|STEAP4|MIR210	GRI-MGI_down
GO Biological Processes	GO:0010257	NADH dehydrogenase complex assembly	-2.6	3.7	7	NDUFAB1|NDUFV1|NDUFS4|NDUFS8|ACAD9|NDUFA13|NDUFAF2	GRI-MGI_down
GO Cellular Components	GO:0070161	anchoring junction	-2.6	1.8	29	ATP2A2|ADGRB1|CLTC|EGFR|FAP|FAT1|FLNB|FZD2|ITGAV|PTPN12|RPS8|S100A11|SLC4A2|SLC9A1|TBCD|TRIP6|FZD1|NUMB|LIN7A|ARPC3|SORBS3|FRS2|PKP3|ITGA11|HACD3|AHI1|LIMS2|ENAH|SYNPO2	GRI-MGI_down
GO Biological Processes	GO:0002283	neutrophil activation involved in immune response	-2.6	1.8	26	AGL|ASAH1|DYNC1H1|EEF1A1|SERPINB1|HSP90AA1|HSP90AB1|ITGAV|LAIR1|NEU1|PECAM1|PSAP|PTPRJ|RAB3A|S100A11|STK10|TCN1|TCIRG1|CCT2|GCA|LAMTOR1|MMP25|GSDMD|CRISPLD2|TMEM173|NHLRC3	GRI-MGI_down
GO Biological Processes	GO:0072511	divalent inorganic cation transport	-2.6	1.8	26	ATP2A2|ATP2B4|BDKRB1|EPO|NIPSNAP2|CBLIF|GPER1|ITGAV|NOS3|NTSR1|PRKCE|SLC9A1|SPG7|SRI|TCN1|CALCRL|TRDN|MICU1|SLC30A9|SLC39A14|SLC40A1|CDH23|MAIP1|TMC1|NPSR1|MIR210	GRI-MGI_down
KEGG Pathway	hsa05205	Proteoglycans in cancer	-2.6	2.4	14	DDX5|EGFR|ESR1|FLNB|FZD2|HRAS|ITGAV|SLC9A1|WNT7B|WNT11|FZD1|FZD4|ROCK2|FRS2	GRI-MGI_down
GO Biological Processes	GO:0032436	positive regulation of proteasomal ubiquitin-dependent protein catabolic process	-2.6	3.3	8	PLK3|PRKN|PLK1|PIAS1|RNF14|HSPBP1|ANKIB1|ZFAND2A	GRI-MGI_down
GO Biological Processes	GO:0060972	left/right pattern formation	-2.5	6.5	4	CITED2|HSPB11|AHI1|DNAAF1	GRI-MGI_down
GO Cellular Components	GO:0005680	anaphase-promoting complex	-2.5	6.5	4	ANAPC15|UBE2S|ANAPC7|ANAPC16	GRI-MGI_down
GO Biological Processes	GO:2001238	positive regulation of extrinsic apoptotic signaling pathway	-2.5	4.2	6	GPER1|PAK2|SKIL|STK3|TNFRSF12A|ZSWIM2	GRI-MGI_down
GO Biological Processes	GO:0140053	mitochondrial gene expression	-2.5	2.5	12	FOXO3|GARS1|MTERF1|MTO1|MRPL16|QRSL1|TWNK|AARS2|TFB2M|MRPL43|MPV17L2|EARS2	GRI-MGI_down
GO Cellular Components	GO:0044437	vacuolar part	-2.5	1.7	29	ASAH1|CLTC|DYNC1H1|EEF1A1|CBLIF|GNA11|HSP90AA1|HSP90AB1|NEU1|NSF|PSAP|UVRAG|TMEM59|TCIRG1|IFI30|CCT2|GCA|SLC17A5|VPS41|LAMTOR1|LAPTM4B|VPS35|SLC7A14|PLEKHF1|VMP1|BORCS5|ATG9B|TMEM173|NHLRC3	GRI-MGI_down
GO Molecular Functions	GO:0042562	hormone binding	-2.5	3	9	ACHE|CHRNA1|EGFR|GPER1|MLNR|MTNR1A|NQO2|CALCRL|SLC40A1	GRI-MGI_down
GO Biological Processes	GO:0099072	regulation of postsynaptic membrane neurotransmitter receptor levels	-2.5	3.6	7	HRAS|PRKCI|STX3|NUMB|ARC|ADAM22|VPS35	GRI-MGI_down
KEGG Pathway	hsa00970	Aminoacyl-tRNA biosynthesis	-2.5	3.6	7	GARS1|VARS|WARS1|LARS1|QRSL1|AARS2|EARS2	GRI-MGI_down
GO Biological Processes	GO:0072503	cellular divalent inorganic cation homeostasis	-2.5	1.8	26	ADRA1B|ATP2A2|ATP2B4|BDKRB1|EPO|ESR1|GNA15|GPR12|GPR17|GPER1|ITGAV|NTSR1|PRKCE|SRI|S1PR4|LPAR2|TCIRG1|TRDN|MICU1|SLC30A9|SLC39A14|ATP13A1|CDH23|MAIP1|C19orf12|NPSR1	GRI-MGI_down
GO Biological Processes	GO:0002275	myeloid cell activation involved in immune response	-2.5	1.7	28	AGL|ASAH1|DYNC1H1|EEF1A1|SERPINB1|HSP90AA1|HSP90AB1|ITGAV|LAIR1|NEU1|PECAM1|PRKCE|PSAP|PTPRJ|RAB3A|S100A11|STK10|TCN1|TCIRG1|CCT2|GCA|LAMTOR1|MMP25|GSDMD|CRISPLD2|MILR1|TMEM173|NHLRC3	GRI-MGI_down
GO Biological Processes	GO:0018105	peptidyl-serine phosphorylation	-2.5	2.1	18	ATP2B4|CREBL2|EGFR|EPO|HSP90AA1|HSP90AB1|IL11|PAK2|PLK1|PRKCE|PRKCI|ROCK2|AKAP9|MAST3|MAST2|DDIT4|SMYD3|TSSK6	GRI-MGI_down
GO Biological Processes	GO:0032434	regulation of proteasomal ubiquitin-dependent protein catabolic process	-2.5	2.8	10	PLK3|HSP90AB1|PRKN|PLK1|PIAS1|RNF14|HSPBP1|ANKIB1|CCAR2|ZFAND2A	GRI-MGI_down
GO Cellular Components	GO:0005923	bicellular tight junction	-2.5	2.8	10	CLDN11|PRKCI|TBCD|LIN7A|CLDN6|CLDN9|PATJ|MTDH|MAPK15|OCLN	GRI-MGI_down
GO Biological Processes	GO:0030003	cellular cation homeostasis	-2.5	1.7	32	ADRA1B|ATP2A2|ATP2B4|BDKRB1|EPO|ESR1|GNA15|GPR12|GPR17|GPER1|ITGAV|NTSR1|PRKCE|SLC4A2|SLC9A1|SRI|S1PR4|LPAR2|TCIRG1|TRDN|MICU1|SLC30A9|SLC39A14|SLC40A1|CLN6|ATP13A1|CDH23|MAIP1|NDFIP1|C19orf12|COX19|NPSR1	GRI-MGI_down
GO Biological Processes	GO:0016236	macroautophagy	-2.5	2	18	PRKN|UVRAG|IFT88|MTMR3|FEZ2|TCIRG1|NOD1|PACS2|PRKAG2|LAMTOR1|ATG2B|VPS35|VMP1|TP53INP1|UBXN2A|SYNPO2|ATG9B|TMEM173	GRI-MGI_down
GO Biological Processes	GO:0070673	response to interleukin-18	-2.5	9.3	3	IL18|IL18BP|OCLN	GRI-MGI_down
GO Biological Processes	GO:0060736	prostate gland growth	-2.5	9.3	3	ESR1|PSAP|UBE3A	GRI-MGI_down
GO Biological Processes	GO:1904064	positive regulation of cation transmembrane transport	-2.5	2.6	11	BDKRB1|NIPSNAP2|GPER1|NTSR1|SLC9A1|SRI|AKAP9|TRDN|ARC|NPSR1|MIR210	GRI-MGI_down
GO Biological Processes	GO:0034311	diol metabolic process	-2.5	6.2	4	ASAH1|PCBD1|PTS|DEGS2	GRI-MGI_down
GO Biological Processes	GO:0097190	apoptotic signaling pathway	-2.4	1.7	30	DDX5|EPO|EYA4|FOXO3|GPER1|HRAS|ITGAV|NOS3|PAK2|PRKN|SKIL|STK3|ZNF205|URI1|CRADD|SGPL1|BCLAF1|PDCD6|FEM1B|ERN2|FASTK|NDUFA13|TNFRSF12A|DDIT4|DIABLO|CCAR2|PLEKHF1|ATAD5|ZSWIM2|MIR210	GRI-MGI_down
GO Molecular Functions	GO:0019904	protein domain specific binding	-2.4	1.6	34	ATP2B4|ADGRB1|CDC5L|CLTC|DDX5|FZD2|HSP90AA1|HSP90AB1|NSF|NUMA1|PRKN|PTPN12|SH3BGR|UVRAG|WARS1|FZD1|FZD4|NR0B2|PIAS1|CRADD|LIN7A|RPH3AL|CITED2|NOD1|EHMT2|LSM4|CRIM1|ENAH|PHRF1|SHCBP1|NDFIP1|MYPN|MAPK15|OCLN	GRI-MGI_down
GO Biological Processes	GO:0007043	cell-cell junction assembly	-2.4	2.8	10	PECAM1|PRKCI|TBCD|WNT11|ROCK2|GJC1|PATJ|PKP3|MTDH|OCLN	GRI-MGI_down
GO Biological Processes	GO:0050999	regulation of nitric-oxide synthase activity	-2.4	4	6	ATP2B4|EGFR|HSP90AA1|NOS3|NOD1|DDAH2	GRI-MGI_down
KEGG Pathway	hsa04141	Protein processing in endoplasmic reticulum	-2.4	2.5	12	HSPA1L|HSP90AA1|HSP90AB1|PRKN|UBE2D2|MBTPS1|SEC24D|SEC61G|HSPBP1|EIF2AK1|DNAJB12|SIL1	GRI-MGI_down
GO Biological Processes	GO:0002446	neutrophil mediated immunity	-2.4	1.8	26	AGL|ASAH1|DYNC1H1|EEF1A1|SERPINB1|HSP90AA1|HSP90AB1|ITGAV|LAIR1|NEU1|PECAM1|PSAP|PTPRJ|RAB3A|S100A11|STK10|TCN1|TCIRG1|CCT2|GCA|LAMTOR1|MMP25|GSDMD|CRISPLD2|TMEM173|NHLRC3	GRI-MGI_down
GO Biological Processes	GO:0006091	generation of precursor metabolites and energy	-2.4	1.8	27	AGL|NIPSNAP2|FOXK2|IDO1|NDUFAB1|NDUFV1|NDUFS4|NDUFS8|NQO2|PHKA1|PHKG1|TSTA3|UQCRFS1|GNPDA1|AKR1A1|ME3|POLG2|PASK|NDUFA13|PRKAG2|DDIT4|STEAP4|ACSS1|NDUFAF2|MTFR2|AFG1L|MIR210	GRI-MGI_down
GO Biological Processes	GO:0007017	microtubule-based process	-2.4	1.6	36	APBA1|CLTC|PLK3|DYNC1H1|TNPO1|TRIM37|NUMA1|PCM1|PEX1|PLK1|RNF4|CLIP1|SPG7|TBCD|UVRAG|RASSF7|IFT88|ROCK2|AKAP9|CDK2AP2|TRDN|KIF2C|HSPB11|DNAL1|KATNAL1|LZTS2|BRSK1|CEP19|TMEM67|BORCS5|DNAAF1|BICDL2|KIF18B|LCA5L|MAPK15|SKA2	GRI-MGI_down
GO Biological Processes	GO:0071634	regulation of transforming growth factor beta production	-2.4	4.7	5	HSP90AB1|ITGAV|MYB|WNT11|LAPTM4B	GRI-MGI_down
GO Biological Processes	GO:0006820	anion transport	-2.4	1.7	31	APBA1|CA5A|NFKBIE|NTSR1|PSAP|RAB3A|SLC4A2|SLC9A1|SLC7A5|ASIC3|OSBPL2|SLC23A1|SLC35A3|SLC17A5|SLCO4A1|SLC25A24|PNPLA8|PRKAG2|SLC12A9|TTYH1|SLC7A14|TTYH3|SLC44A4|SLC37A3|SLC16A10|SFXN4|SLC25A29|SLC38A8|BEST4|ANO9|SLC35B2	GRI-MGI_down
GO Biological Processes	GO:0006865	amino acid transport	-2.4	2.6	11	APBA1|NFKBIE|NTSR1|RAB3A|SLC7A5|SLC17A5|SLC7A14|SLC16A10|SFXN4|SLC25A29|SLC38A8	GRI-MGI_down
GO Biological Processes	GO:0002444	myeloid leukocyte mediated immunity	-2.4	1.7	28	AGL|ASAH1|DYNC1H1|EEF1A1|SERPINB1|HSP90AA1|HSP90AB1|ITGAV|LAIR1|NEU1|PECAM1|SERPINB9|PSAP|PTPRJ|RAB3A|S100A11|STK10|TCN1|TCIRG1|CCT2|GCA|LAMTOR1|MMP25|GSDMD|CRISPLD2|MILR1|TMEM173|NHLRC3	GRI-MGI_down
GO Molecular Functions	GO:0030165	PDZ domain binding	-2.4	3.1	8	ATP2B4|ADGRB1|FZD2|NSF|PRKN|FZD1|FZD4|CRIM1	GRI-MGI_down
GO Biological Processes	GO:2000243	positive regulation of reproductive process	-2.4	3.5	7	LFNG|CITED2|SMURF2|YTHDC2|CFAP69|MAPK15|MEIOC	GRI-MGI_down
GO Biological Processes	GO:0002064	epithelial cell development	-2.4	2.3	14	CDK6|ESR1|FAT1|FLNB|PECAM1|PSAP|WNT7B|ROCK2|FEM1B|FRS2|FNDC3A|TMC1|KDF1|LRTOMT	GRI-MGI_down
GO Biological Processes	GO:0006412	translation	-2.4	1.6	34	EEF1A1|EEF1D|EGFR|FOXO3|GARS1|RPL13|RPL21|RPL28|RPS8|RPS21|SRP9|VARS|WARS1|AIMP2|EIF3A|EIF3B|EIF4G3|EIF2B3|ROCK2|PKP3|HABP4|PASK|EIF2AK1|PAIP2|LARS1|MRPL16|SRBD1|QRSL1|AARS2|MRPL43|MPV17L2|EARS2|NANOS1|MIR210	GRI-MGI_down
GO Biological Processes	GO:0009310	amine catabolic process	-2.4	5.9	4	ATP2B4|IDO1|SLC44A1|IDO2	GRI-MGI_down
GO Biological Processes	GO:0051084	'de novo' posttranslational protein folding	-2.4	4.6	5	HSPA1L|SELENOF|CCT2|DNAJB12|DNAJC18	GRI-MGI_down
GO Biological Processes	GO:0042698	ovulation cycle	-2.4	3.4	7	EGFR|ESR1|FOXO3|NOS3|PAM|FZD4|SGPL1	GRI-MGI_down
GO Biological Processes	GO:0031122	cytoplasmic microtubule organization	-2.4	3.9	6	PLK3|DYNC1H1|NUMA1|PCM1|TRDN|KATNAL1	GRI-MGI_down
GO Biological Processes	GO:0031589	cell-substrate adhesion	-2.4	1.9	20	CDK6|FBLN1|ITGAV|PECAM1|PRKCE|PTPRJ|S100A10|SLC9A1|TBCD|TRIP6|FZD4|ROCK2|SORBS3|TESK2|ITGA11|SNED1|TNFRSF12A|LIMS2|TTYH1|PLET1	GRI-MGI_down
GO Cellular Components	GO:0070160	tight junction	-2.3	2.7	10	CLDN11|PRKCI|TBCD|LIN7A|CLDN6|CLDN9|PATJ|MTDH|MAPK15|OCLN	GRI-MGI_down
GO Molecular Functions	GO:0002020	protease binding	-2.3	2.7	10	CLTC|FAP|ITGAV|PRKN|SERPINB9|PSAP|SRI|CRADD|ADRM1|TWNK	GRI-MGI_down
GO Biological Processes	GO:0031987	locomotion involved in locomotory behavior	-2.3	8.5	3	FZD4|CLN6|VPS35	GRI-MGI_down
GO Biological Processes	GO:0003334	keratinocyte development	-2.3	8.5	3	FLNB|PSAP|KDF1	GRI-MGI_down
GO Biological Processes	GO:0060442	branching involved in prostate gland morphogenesis	-2.3	8.5	3	ESR1|FEM1B|FRS2	GRI-MGI_down
GO Biological Processes	GO:0006527	arginine catabolic process	-2.3	8.5	3	ATP2B4|NOS3|DDAH2	GRI-MGI_down
GO Biological Processes	GO:0051657	maintenance of organelle location	-2.3	8.5	3	ALB|UVRAG|AKAP9	GRI-MGI_down
GO Biological Processes	GO:0006873	cellular ion homeostasis	-2.3	1.6	32	ADRA1B|ATP2A2|ATP2B4|BDKRB1|EPO|ESR1|GNA15|GPR12|GPR17|GPER1|ITGAV|NTSR1|PRKCE|SLC4A2|SLC9A1|SRI|S1PR4|LPAR2|TCIRG1|TRDN|MICU1|SLC30A9|SLC39A14|SLC40A1|CLN6|ATP13A1|CDH23|MAIP1|NDFIP1|C19orf12|COX19|NPSR1	GRI-MGI_down
GO Molecular Functions	GO:0016301	kinase activity	-2.3	1.6	36	CDK6|CHKA|PLK3|EGFR|EPHB4|GRK5|PAK2|CDK14|PHKA1|PHKG1|PLK1|PRKCE|PRKCI|STK3|STK10|PKMYT1|CCNE2|ROCK2|TESK2|ERN2|FASTK|MAST3|MAST2|PASK|PPIP5K2|EIF2AK1|CRIM1|PRKAG2|FN3K|FN3KRP|MAP3K19|TSSK6|BRSK1|AK7|MAPK15|PIM3	GRI-MGI_down
GO Molecular Functions	GO:0060090	molecular adaptor activity	-2.3	2.2	15	CHN1|SH3BGR|SLC9A1|COL14A1|AIMP2|EIF3B|CRADD|PDCD6|AKAP9|TRDN|FRS2|GATAD2A|LAMTOR1|BIN3|SYNPO2	GRI-MGI_down
GO Biological Processes	GO:0015980	energy derivation by oxidation of organic compounds	-2.3	2	17	AGL|NDUFAB1|NDUFV1|NDUFS4|NDUFS8|PHKA1|PHKG1|UQCRFS1|ME3|POLG2|PASK|NDUFA13|PRKAG2|NDUFAF2|MTFR2|AFG1L|MIR210	GRI-MGI_down
GO Biological Processes	GO:0060401	cytosolic calcium ion transport	-2.3	2.4	12	ATP2A2|ATP2B4|BDKRB1|EPO|GPER1|NTSR1|PRKCE|SRI|TRDN|MICU1|MAIP1|NPSR1	GRI-MGI_down
GO Biological Processes	GO:0006399	tRNA metabolic process	-2.3	2.3	13	GARS1|VARS|WARS1|AIMP2|POP7|POP4|MTO1|LARS1|QRSL1|AARS2|OSGEPL1|EARS2|TYW5	GRI-MGI_down
GO Biological Processes	GO:0015711	organic anion transport	-2.3	1.8	25	APBA1|CA5A|NFKBIE|NTSR1|PSAP|RAB3A|SLC4A2|SLC7A5|ASIC3|OSBPL2|SLC23A1|SLC35A3|SLC17A5|SLCO4A1|SLC25A24|PNPLA8|PRKAG2|SLC7A14|SLC44A4|SLC37A3|SLC16A10|SFXN4|SLC25A29|SLC38A8|SLC35B2	GRI-MGI_down
GO Cellular Components	GO:0005925	focal adhesion	-2.3	1.8	22	ADGRB1|CLTC|EGFR|FAP|FAT1|FLNB|FZD2|ITGAV|PTPN12|RPS8|SLC4A2|SLC9A1|TRIP6|FZD1|NUMB|ARPC3|SORBS3|ITGA11|HACD3|LIMS2|ENAH|SYNPO2	GRI-MGI_down
GO Cellular Components	GO:0005813	centrosome	-2.3	1.7	26	CDK6|PLK3|DYNC1H1|NUMA1|PCM1|PLK1|CLIP1|TBCD|UVRAG|IFT88|CCNE2|ROCK2|AKAP9|PATJ|KIF2C|FBXW11|BBS9|HSPB11|AHI1|KATNAL1|LZTS2|BRSK1|DCTN5|CEP19|CEP95|TMEM67	GRI-MGI_down
GO Biological Processes	GO:0043299	leukocyte degranulation	-2.3	1.7	27	AGL|ASAH1|DYNC1H1|EEF1A1|SERPINB1|HSP90AA1|HSP90AB1|ITGAV|LAIR1|NEU1|PECAM1|PSAP|PTPRJ|RAB3A|S100A11|STK10|TCN1|TCIRG1|CCT2|GCA|LAMTOR1|MMP25|GSDMD|CRISPLD2|MILR1|TMEM173|NHLRC3	GRI-MGI_down
GO Biological Processes	GO:0080135	regulation of cellular response to stress	-2.3	1.6	35	CDK6|DDX5|EGFR|EPO|EYA4|FOXO3|HRAS|HSPA1L|HSP90AA1|HSP90AB1|PRDX1|PRKN|PSAP|PTPRF|SKIL|STK3|WNT7B|FZD1|FZD4|TRIP12|ROCK2|BCLAF1|FEM1B|MICU1|NOD1|ERN2|EIF2AK1|HACD3|TMEM33|SLF2|WRNIP1|CCAR2|ATAD5|CGAS|MIR210	GRI-MGI_down
GO Biological Processes	GO:0071604	transforming growth factor beta production	-2.3	4.5	5	HSP90AB1|ITGAV|MYB|WNT11|LAPTM4B	GRI-MGI_down
GO Biological Processes	GO:0090150	establishment of protein localization to membrane	-2.3	1.9	19	EGFR|HRAS|HSP90AA1|NSF|PRKCI|RPL13|RPL21|RPL28|RPS8|RPS21|CLIP1|SRP9|STX3|GET1|GGA2|NDUFA13|VPS35|MAIP1|CNST	GRI-MGI_down
GO Biological Processes	GO:0006874	cellular calcium ion homeostasis	-2.3	1.8	24	ADRA1B|ATP2A2|ATP2B4|BDKRB1|EPO|ESR1|GNA15|GPR12|GPR17|GPER1|ITGAV|NTSR1|PRKCE|SRI|S1PR4|LPAR2|TCIRG1|TRDN|MICU1|ATP13A1|CDH23|MAIP1|C19orf12|NPSR1	GRI-MGI_down
GO Biological Processes	GO:0010524	positive regulation of calcium ion transport into cytosol	-2.3	3.8	6	BDKRB1|GPER1|NTSR1|SRI|TRDN|NPSR1	GRI-MGI_down
GO Biological Processes	GO:0045786	negative regulation of cell cycle	-2.3	1.6	31	CDC5L|CDK6|PLK3|EGFR|FAP|GPER1|HRAS|HSP90AB1|TRIM37|PLK1|SKIL|TOP2B|CRADD|FEM1B|CDK2AP2|ERN2|EHMT2|SUZ12|ANAPC15|CRLF3|PRKAG2|HECA|LAMTOR1|PRR11|CCAR2|YTHDC2|BRSK1|TMEM67|TP53INP1|RAD9B|MEIOC	GRI-MGI_down
GO Biological Processes	GO:0062009	secondary palate development	-2.3	5.7	4	FZD2|WNT11|FZD1|MMP25	GRI-MGI_down
GO Biological Processes	GO:0051446	positive regulation of meiotic cell cycle	-2.3	5.7	4	LFNG|YTHDC2|MAPK15|MEIOC	GRI-MGI_down
GO Biological Processes	GO:0060070	canonical Wnt signaling pathway	-2.3	1.9	19	TLE5|EGFR|FOXO3|FZD2|PRKN|CDK14|STK3|WNT7B|WNT11|FZD1|FZD4|JRK|VPS35|CCAR2|SMURF2|KREMEN2|TBL1XR1|WLS|LZTS2	GRI-MGI_down
GO Biological Processes	GO:2000058	regulation of ubiquitin-dependent protein catabolic process	-2.3	2.5	11	PLK3|HSP90AB1|PRKN|PLK1|UBE3A|PIAS1|RNF14|HSPBP1|ANKIB1|CCAR2|ZFAND2A	GRI-MGI_down
GO Cellular Components	GO:0005924	cell-substrate adherens junction	-2.3	1.8	22	ADGRB1|CLTC|EGFR|FAP|FAT1|FLNB|FZD2|ITGAV|PTPN12|RPS8|SLC4A2|SLC9A1|TRIP6|FZD1|NUMB|ARPC3|SORBS3|ITGA11|HACD3|LIMS2|ENAH|SYNPO2	GRI-MGI_down
GO Biological Processes	GO:0055076	transition metal ion homeostasis	-2.3	2.6	10	PRKN|SRI|SLC30A9|SLC39A14|STEAP1|EIF2AK1|SLC40A1|STEAP4|NDFIP1|COX19	GRI-MGI_down
GO Molecular Functions	GO:0051082	unfolded protein binding	-2.3	2.6	10	HSPA1L|HSP90AA1|HSP90AB1|SPG7|TTC1|CCT2|ERN2|NUDC|SIL1|TMEM67	GRI-MGI_down
KEGG Pathway	hsa05217	Basal cell carcinoma	-2.3	3.7	6	FZD2|WNT7B|WNT11|FZD1|FZD4|PTCH2	GRI-MGI_down
GO Biological Processes	GO:0006120	mitochondrial electron transport, NADH to ubiquinone	-2.3	3.7	6	NDUFAB1|NDUFV1|NDUFS4|NDUFS8|NDUFA13|MIR210	GRI-MGI_down
GO Biological Processes	GO:0071407	cellular response to organic cyclic compound	-2.3	1.7	27	ATP2B4|CDC5L|DDX5|EGFR|ESR1|FOXO3|GPER1|HSP90AB1|IL18|PAK2|PRKN|RNF4|SLC9A1|TFPI|UBE3A|NR0B2|PIAS1|URI1|ROCK2|RNF14|AKAP9|DDIT4|IFIH1|SMYD3|CGAS|ZNF366|TMEM173	GRI-MGI_down
GO Biological Processes	GO:0042133	neurotransmitter metabolic process	-2.3	2.5	11	ACHE|ATP2B4|CHKA|HSP90AA1|HSP90AB1|NOS3|ROCK2|SLC44A1|DDAH2|SLC44A4|LRTOMT	GRI-MGI_down
GO Biological Processes	GO:0023061	signal release	-2.2	1.8	24	APBA1|ATP2A2|EGFR|GPER1|IL11|MYB|PRKN|PRKCE|RAB3A|SCT|SRI|STX3|FZD4|NR0B2|LIN7A|RPH3AL|TCIRG1|PASK|VPS35|WLS|SLC44A4|BRSK1|NDUFAF2|PIM3	GRI-MGI_down
GO Molecular Functions	GO:0015101	organic cation transmembrane transporter activity	-2.2	5.5	4	SLC44A1|SLC44A4|SLC25A29|SLC25A47	GRI-MGI_down
GO Biological Processes	GO:0045862	positive regulation of proteolysis	-2.2	1.9	20	PLK3|FBLN1|GPER1|PRKN|PLK1|PIAS1|CRADD|ROCK2|RNF14|PDCD6|NOD1|ADRM1|FBXW11|HSPBP1|NDUFA13|ANKIB1|CLN6|DIABLO|VSIR|ZFAND2A	GRI-MGI_down
GO Biological Processes	GO:0045787	positive regulation of cell cycle	-2.2	1.8	21	CCNT2|PLK3|DYNC1H1|EGFR|FAP|GPER1|HSP90AB1|LFNG|NUMA1|PRKCE|CRADD|ROCK2|CITED2|ANKRD17|CRLF3|SLF2|YTHDC2|ATAD5|DBF4B|MAPK15|MEIOC	GRI-MGI_down
GO Cellular Components	GO:0036038	MKS complex	-2.2	7.9	3	AHI1|TCTN1|TMEM67	GRI-MGI_down
GO Molecular Functions	GO:0031005	filamin binding	-2.2	7.9	3	TMEM67|SYNPO2|RFLNB	GRI-MGI_down
GO Biological Processes	GO:0106074	aminoacyl-tRNA metabolism involved in translational fidelity	-2.2	7.9	3	VARS|LARS1|AARS2	GRI-MGI_down
GO Molecular Functions	GO:0002161	aminoacyl-tRNA editing activity	-2.2	7.9	3	VARS|LARS1|AARS2	GRI-MGI_down
GO Biological Processes	GO:0070986	left/right axis specification	-2.2	7.9	3	CITED2|HSPB11|AHI1	GRI-MGI_down
GO Biological Processes	GO:0060113	inner ear receptor cell differentiation	-2.2	3.7	6	FZD2|POU4F3|IFT88|CDH23|TMC1|LRTOMT	GRI-MGI_down
GO Biological Processes	GO:1903078	positive regulation of protein localization to plasma membrane	-2.2	3.7	6	EGFR|GPER1|PRKCE|PRKCI|STX3|CNST	GRI-MGI_down
GO Cellular Components	GO:0030055	cell-substrate junction	-2.2	1.8	22	ADGRB1|CLTC|EGFR|FAP|FAT1|FLNB|FZD2|ITGAV|PTPN12|RPS8|SLC4A2|SLC9A1|TRIP6|FZD1|NUMB|ARPC3|SORBS3|ITGA11|HACD3|LIMS2|ENAH|SYNPO2	GRI-MGI_down
GO Biological Processes	GO:0001508	action potential	-2.2	2.6	10	ATP2A2|CHRNA1|GNA11|GPER1|NRCAM|NTSR1|SLC9A1|SRI|GJC1|AKAP9	GRI-MGI_down
GO Biological Processes	GO:0071548	response to dexamethasone	-2.2	4.3	5	EGFR|EPO|FOXO3|DDIT4|SMYD3	GRI-MGI_down
GO Biological Processes	GO:0007626	locomotory behavior	-2.2	2.2	13	APBA1|GBX1|IDO1|NTSR1|PRKN|PRKCE|PSAP|FZD4|MTA1|ADAM22|CLN6|VPS35|CDH23	GRI-MGI_down
GO Molecular Functions	GO:0016773	phosphotransferase activity, alcohol group as acceptor	-2.2	1.6	33	CDK6|CHKA|PLK3|EGFR|EPHB4|GRK5|PAK2|CDK14|PHKA1|PHKG1|PLK1|PRKCE|PRKCI|STK3|STK10|PKMYT1|CCNE2|ROCK2|TESK2|ERN2|FASTK|MAST3|MAST2|PASK|EIF2AK1|CRIM1|NT5C3A|PRKAG2|MAP3K19|TSSK6|BRSK1|MAPK15|PIM3	GRI-MGI_down
GO Biological Processes	GO:0043254	regulation of protein complex assembly	-2.2	1.7	24	ALB|CAPZA2|ESR1|GFAP|HSP90AA1|NUMA1|PRKCE|RAB3A|RNF4|CLIP1|TBCD|WARS1|BCLAF1|ARPC3|AKAP9|SETX|VPS41|SLF2|VPS35|NCLN|CDC42EP5|KANK4|MAPK15|PFN4	GRI-MGI_down
GO Biological Processes	GO:1903428	positive regulation of reactive oxygen species biosynthetic process	-2.2	3.6	6	ADGRB1|FOXO3|HSP90AA1|HSP90AB1|ZNF205|DDAH2	GRI-MGI_down
GO Biological Processes	GO:0003281	ventricular septum development	-2.2	3.2	7	FZD2|NOS3|WNT11|FZD1|CITED2|FRS2|DCTN5	GRI-MGI_down
GO Biological Processes	GO:0034767	positive regulation of ion transmembrane transport	-2.2	2.4	11	BDKRB1|NIPSNAP2|GPER1|NTSR1|SLC9A1|SRI|AKAP9|TRDN|ARC|NPSR1|MIR210	GRI-MGI_down
GO Biological Processes	GO:0002366	leukocyte activation involved in immune response	-2.2	1.6	33	AGL|ASAH1|DYNC1H1|EEF1A1|SERPINB1|HSP90AA1|HSP90AB1|IL12RB1|IL18|ITGAV|LAIR1|LFNG|MYB|NEU1|PECAM1|PRKCE|PSAP|PTPRJ|RAB3A|S100A11|STK10|TCN1|TCIRG1|CCT2|GCA|LAMTOR1|MMP25|GSDMD|ATAD5|CRISPLD2|MILR1|TMEM173|NHLRC3	GRI-MGI_down
GO Biological Processes	GO:1903322	positive regulation of protein modification by small protein conjugation or removal	-2.2	2.5	10	PRKN|PLK1|UBE3A|AIMP2|PIAS1|MTA1|PDCD6|HSPBP1|UBE2S|NDFIP1	GRI-MGI_down
GO Biological Processes	GO:0002230	positive regulation of defense response to virus by host	-2.2	5.2	4	IL12RB1|TRAF3IP2|CGAS|TMEM173	GRI-MGI_down
GO Biological Processes	GO:0097191	extrinsic apoptotic signaling pathway	-2.2	2.1	14	EYA4|FOXO3|GPER1|ITGAV|NOS3|PAK2|SKIL|STK3|CRADD|FEM1B|NDUFA13|TNFRSF12A|DIABLO|ZSWIM2	GRI-MGI_down
GO Biological Processes	GO:0060119	inner ear receptor cell development	-2.2	4.2	5	FZD2|IFT88|CDH23|TMC1|LRTOMT	GRI-MGI_down
GO Biological Processes	GO:0006458	'de novo' protein folding	-2.2	4.2	5	HSPA1L|SELENOF|CCT2|DNAJB12|DNAJC18	GRI-MGI_down
GO Biological Processes	GO:1903827	regulation of cellular protein localization	-2.2	1.7	26	CLTC|PLK3|EGFR|GPER1|HRAS|HSPA1L|HSP90AA1|HSP90AB1|NUMA1|PRKN|PCM1|PLK1|PRKCE|PRKCI|STX3|NUMB|CCNE2|ROCK2|TMEM59|CCT2|ABHD17B|VPS35|XPO4|LZTS2|CNST|SHISA7	GRI-MGI_down
GO Biological Processes	GO:0055074	calcium ion homeostasis	-2.2	1.7	24	ADRA1B|ATP2A2|ATP2B4|BDKRB1|EPO|ESR1|GNA15|GPR12|GPR17|GPER1|ITGAV|NTSR1|PRKCE|SRI|S1PR4|LPAR2|TCIRG1|TRDN|MICU1|ATP13A1|CDH23|MAIP1|C19orf12|NPSR1	GRI-MGI_down
GO Biological Processes	GO:0097711	ciliary basal body-plasma membrane docking	-2.2	2.9	8	DYNC1H1|HSP90AA1|PCM1|PLK1|AKAP9|AHI1|TCTN1|TMEM67	GRI-MGI_down
GO Biological Processes	GO:0044770	cell cycle phase transition	-2.2	1.6	30	ATP2B4|CDK6|PLK3|DYNC1H1|EGFR|HSP90AA1|NASP|PCM1|CDK14|PLK1|TAF2|PIAS1|CRADD|PKMYT1|CCNE2|AKAP9|CDK2AP2|FBXW11|ORC6|ANAPC15|ANKRD17|UBE2S|CRLF3|ANAPC7|ATAD5|DBF4B|BRSK1|ANAPC16|CACUL1|MAPK15	GRI-MGI_down
GO Biological Processes	GO:0043043	peptide biosynthetic process	-2.2	1.6	34	EEF1A1|EEF1D|EGFR|FOXO3|GARS1|RPL13|RPL21|RPL28|RPS8|RPS21|SRP9|VARS|WARS1|AIMP2|EIF3A|EIF3B|EIF4G3|EIF2B3|ROCK2|PKP3|HABP4|PASK|EIF2AK1|PAIP2|LARS1|MRPL16|SRBD1|QRSL1|AARS2|MRPL43|MPV17L2|EARS2|NANOS1|MIR210	GRI-MGI_down
GO Biological Processes	GO:0002263	cell activation involved in immune response	-2.2	1.6	33	AGL|ASAH1|DYNC1H1|EEF1A1|SERPINB1|HSP90AA1|HSP90AB1|IL12RB1|IL18|ITGAV|LAIR1|LFNG|MYB|NEU1|PECAM1|PRKCE|PSAP|PTPRJ|RAB3A|S100A11|STK10|TCN1|TCIRG1|CCT2|GCA|LAMTOR1|MMP25|GSDMD|ATAD5|CRISPLD2|MILR1|TMEM173|NHLRC3	GRI-MGI_down
GO Biological Processes	GO:0051495	positive regulation of cytoskeleton organization	-2.1	2.1	14	DYNC1H1|HRAS|NUMA1|PRKCE|CLIP1|S100A10|WNT11|ROCK2|ARPC3|AKAP9|SORBS3|CDC42EP5|SYNPO2|MAPK15	GRI-MGI_down
GO Biological Processes	GO:0018209	peptidyl-serine modification	-2.1	1.9	18	ATP2B4|CREBL2|EGFR|EPO|HSP90AA1|HSP90AB1|IL11|PAK2|PLK1|PRKCE|PRKCI|ROCK2|AKAP9|MAST3|MAST2|DDIT4|SMYD3|TSSK6	GRI-MGI_down
GO Biological Processes	GO:1902043	positive regulation of extrinsic apoptotic signaling pathway via death domain receptors	-2.1	7.3	3	SKIL|STK3|ZSWIM2	GRI-MGI_down
GO Molecular Functions	GO:0052689	carboxylic ester hydrolase activity	-2.1	2.5	10	ACHE|CHKA|RPE65|VARS|PNPLA8|LARS1|PTRH2|APMAP|AARS2|ACOT4	GRI-MGI_down
KEGG Pathway	hsa04120	Ubiquitin mediated proteolysis	-2.1	2.5	10	TRIM37|PRKN|UBE2D2|UBE3A|PIAS1|TRIP12|FBXW11|UBE2S|ANAPC7|SMURF2	GRI-MGI_down
GO Cellular Components	GO:0030667	secretory granule membrane	-2.1	1.9	17	ITGAV|LAIR1|PAM|PECAM1|PSAP|PTPRJ|RAB3A|SRI|STK10|STX3|RPH3AL|TCIRG1|LAMTOR1|MMP25|CD109|TMEM190|TMEM173	GRI-MGI_down
GO Biological Processes	GO:0071383	cellular response to steroid hormone stimulus	-2.1	2	15	DDX5|EGFR|ESR1|FOXO3|GPER1|RNF4|TFPI|UBE3A|NR0B2|PIAS1|URI1|RNF14|DDIT4|SMYD3|ZNF366	GRI-MGI_down
GO Biological Processes	GO:0034764	positive regulation of transmembrane transport	-2.1	2.2	13	BDKRB1|CREBL2|NIPSNAP2|GPER1|NTSR1|PRKCI|SLC9A1|SRI|AKAP9|TRDN|ARC|NPSR1|MIR210	GRI-MGI_down
GO Biological Processes	GO:0010518	positive regulation of phospholipase activity	-2.1	3.5	6	EGFR|ESR1|GNA15|HRAS|S1PR4|LPAR2	GRI-MGI_down
GO Biological Processes	GO:0002026	regulation of the force of heart contraction	-2.1	5.1	4	ATP2A2|ATP2B4|NOS3|SLC9A1	GRI-MGI_down
GO Molecular Functions	GO:0016702	oxidoreductase activity, acting on single donors with incorporation of molecular oxygen, incorporati	-2.1	5.1	4	IDO1|RPE65|BCO2|IDO2	GRI-MGI_down
GO Biological Processes	GO:1903829	positive regulation of cellular protein localization	-2.1	1.9	18	PLK3|EGFR|GPER1|HRAS|HSPA1L|HSP90AB1|NUMA1|PRKN|PCM1|PLK1|PRKCE|PRKCI|STX3|ROCK2|CCT2|ABHD17B|XPO4|CNST	GRI-MGI_down
GO Biological Processes	GO:0031398	positive regulation of protein ubiquitination	-2.1	2.6	9	PRKN|PLK1|UBE3A|AIMP2|MTA1|PDCD6|HSPBP1|UBE2S|NDFIP1	GRI-MGI_down
KEGG Pathway	hsa04020	Calcium signaling pathway	-2.1	2.2	12	ADRA1B|ATP2A2|ATP2B4|BDKRB1|EGFR|GNA11|GNA15|NOS3|NTSR1|PHKA1|PHKG1|CALML4	GRI-MGI_down
GO Biological Processes	GO:0000904	cell morphogenesis involved in differentiation	-2.1	1.6	34	ADGRB1|CHN1|EPHB4|FBLN1|FAT1|FLNB|GBX1|HSP90AA1|HSP90AB1|ITGAV|NRCAM|PECAM1|PLXNA2|POU4F3|RAB3A|S100A10|SKIL|TBCD|TOP2B|UBE3A|COL14A1|FZD4|NUMB|FEZ2|FRS2|ARC|TNFRSF12A|LIMS2|ENAH|ZSWIM5|SEMA4G|TCTN1|BRSK1|MYPN	GRI-MGI_down
GO Biological Processes	GO:0042775	mitochondrial ATP synthesis coupled electron transport	-2.1	2.8	8	NDUFAB1|NDUFV1|NDUFS4|NDUFS8|UQCRFS1|NDUFA13|AFG1L|MIR210	GRI-MGI_down
GO Biological Processes	GO:2000060	positive regulation of ubiquitin-dependent protein catabolic process	-2.1	2.8	8	PLK3|PRKN|PLK1|PIAS1|RNF14|HSPBP1|ANKIB1|ZFAND2A	GRI-MGI_down
GO Biological Processes	GO:0006260	DNA replication	-2.1	2	16	ACHE|EGFR|HRAS|NASP|REV3L|S100A11|CCNE2|EHMT2|POLG2|ORC6|ANKRD17|TWNK|WRNIP1|ATAD5|DBF4B|RAD9B	GRI-MGI_down
GO Biological Processes	GO:0009914	hormone transport	-2.1	1.9	18	EGFR|GPER1|IL11|MYB|PRKN|PRKCE|SCT|SRI|FZD4|NR0B2|RPH3AL|TCIRG1|PASK|SLCO4A1|SLC44A4|NDUFAF2|SLC16A10|PIM3	GRI-MGI_down
GO Biological Processes	GO:0006457	protein folding	-2.1	2.1	14	HSPA1L|HSP90AA1|HSP90AB1|TBCD|TTC1|SELENOF|CCT2|NUDC|FKBP9|HSPBP1|DNAJB12|SIL1|ALG12|DNAJC18	GRI-MGI_down
GO Biological Processes	GO:0042773	ATP synthesis coupled electron transport	-2.1	2.8	8	NDUFAB1|NDUFV1|NDUFS4|NDUFS8|UQCRFS1|NDUFA13|AFG1L|MIR210	GRI-MGI_down
GO Molecular Functions	GO:0015605	organophosphate ester transmembrane transporter activity	-2.1	4.9	4	SLC25A24|SLC44A4|SLC37A3|SLC35B2	GRI-MGI_down
GO Molecular Functions	GO:0016701	oxidoreductase activity, acting on single donors with incorporation of molecular oxygen	-2.1	4.9	4	IDO1|RPE65|BCO2|IDO2	GRI-MGI_down
GO Biological Processes	GO:0044772	mitotic cell cycle phase transition	-2.1	1.6	28	CDK6|PLK3|DYNC1H1|EGFR|HSP90AA1|NASP|PCM1|CDK14|PLK1|TAF2|PIAS1|CRADD|PKMYT1|CCNE2|AKAP9|CDK2AP2|FBXW11|ORC6|ANAPC15|ANKRD17|UBE2S|CRLF3|ANAPC7|ATAD5|DBF4B|BRSK1|ANAPC16|CACUL1	GRI-MGI_down
GO Biological Processes	GO:1903364	positive regulation of cellular protein catabolic process	-2.1	2.4	10	PLK3|HSP90AA1|PRKN|PLK1|PIAS1|RNF14|HSPBP1|ANKIB1|VPS35|ZFAND2A	GRI-MGI_down
GO Biological Processes	GO:0007039	protein catabolic process in the vacuole	-2.1	6.8	3	TCIRG1|LAPTM4B|VPS35	GRI-MGI_down
GO Biological Processes	GO:0070838	divalent metal ion transport	-2.1	1.7	24	ATP2A2|ATP2B4|BDKRB1|EPO|NIPSNAP2|GPER1|ITGAV|NOS3|NTSR1|PRKCE|SLC9A1|SPG7|SRI|CALCRL|TRDN|MICU1|SLC30A9|SLC39A14|SLC40A1|CDH23|MAIP1|TMC1|NPSR1|MIR210	GRI-MGI_down
GO Biological Processes	GO:0034660	ncRNA metabolic process	-2	1.6	27	CCNT2|FRG1|GARS1|HRAS|RPS8|RPS21|VARS|WARS1|AIMP2|POP7|ERN2|POP4|MTO1|GEMIN4|LARS1|SRRT|MRM3|QRSL1|INTS8|UTP6|AARS2|OSGEPL1|TFB2M|WDR75|TOE1|EARS2|TYW5	GRI-MGI_down
GO Biological Processes	GO:0060412	ventricular septum morphogenesis	-2	3.9	5	FZD2|NOS3|WNT11|FZD1|CITED2	GRI-MGI_down
GO Molecular Functions	GO:0030295	protein kinase activator activity	-2	3	7	CCNT2|EPO|PAK2|STK3|WNT11|PRKAG2|DBF4B	GRI-MGI_down
GO Biological Processes	GO:2001233	regulation of apoptotic signaling pathway	-2	1.8	21	EPO|EYA4|GPER1|ITGAV|NOS3|PAK2|PRKN|SKIL|STK3|ZNF205|URI1|CRADD|BCLAF1|FEM1B|NDUFA13|TNFRSF12A|CCAR2|PLEKHF1|ATAD5|ZSWIM2|MIR210	GRI-MGI_down
GO Biological Processes	GO:0000226	microtubule cytoskeleton organization	-2	1.6	27	CLTC|PLK3|DYNC1H1|TRIM37|NUMA1|PCM1|PLK1|RNF4|CLIP1|TBCD|UVRAG|RASSF7|ROCK2|AKAP9|CDK2AP2|TRDN|KIF2C|DNAL1|KATNAL1|LZTS2|BRSK1|CEP19|TMEM67|DNAAF1|KIF18B|MAPK15|SKA2	GRI-MGI_down
GO Cellular Components	GO:0005769	early endosome	-2	1.8	19	ASAH1|DIAPH2|EGFR|GPER1|UVRAG|NUMB|USP10|PRDX3|GGA2|ARC|VPS41|VPS29|LAPTM4B|VPS35|ZFYVE28|KREMEN2|STEAP4|SYNDIG1|WLS	GRI-MGI_down
GO Biological Processes	GO:1905475	regulation of protein localization to membrane	-2	2.2	12	CLTC|EGFR|GPER1|HRAS|PRKN|PRKCE|PRKCI|STX3|NUMB|TMEM59|CNST|SHISA7	GRI-MGI_down
GO Biological Processes	GO:0002753	cytoplasmic pattern recognition receptor signaling pathway	-2	3.3	6	IRF7|NOD1|ANKRD17|GPATCH3|IFIH1|TMEM173	GRI-MGI_down
GO Cellular Components	GO:0043296	apical junction complex	-2	2.4	10	CLDN11|PRKCI|TBCD|LIN7A|CLDN6|CLDN9|PATJ|MTDH|MAPK15|OCLN	GRI-MGI_down
GO Biological Processes	GO:0044068	modulation by symbiont of host cellular process	-2	4.7	4	ITGAV|KPNA2|PRKN|SERPINB9	GRI-MGI_down
GO Biological Processes	GO:0007263	nitric oxide mediated signal transduction	-2	4.7	4	ATP2B4|EGFR|NOS3|DDAH2	GRI-MGI_down
GO Cellular Components	GO:1990752	microtubule end	-2	4.7	4	NUMA1|CLIP1|KIF2C|KIF18B	GRI-MGI_down
GO Cellular Components	GO:1904949	ATPase complex	-2	2.7	8	BPTF|SLC9A1|YY1|MTA1|ABCB8|SUZ12|GATAD2A|ATAD5	GRI-MGI_down
GO Biological Processes	GO:1903426	regulation of reactive oxygen species biosynthetic process	-2	2.7	8	ATP2B4|ADGRB1|FOXO3|HSP90AA1|HSP90AB1|ZNF205|ROCK2|DDAH2	GRI-MGI_down
GO Cellular Components	GO:0099634	postsynaptic specialization membrane	-2	2.7	8	CHRNA1|KPNA2|NRCAM|AKAP9|ARC|ABHD17B|ADAM22|SHISA7	GRI-MGI_down
GO Biological Processes	GO:1903409	reactive oxygen species biosynthetic process	-2	2.5	9	ATP2B4|ADGRB1|FOXO3|HSP90AA1|HSP90AB1|NOS3|ZNF205|ROCK2|DDAH2	GRI-MGI_down
GO Molecular Functions	GO:0016788	hydrolase activity, acting on ester bonds	-2	1.5	34	ACHE|CHKA|EYA4|INPP1|PMS2|PSPH|PTPN12|PTPRF|PTPRJ|REV3L|RPE65|VARS|MTMR3|POP7|ERN2|POP4|HIBCH|PDE7B|PNPLA8|ABHD17B|NT5C3A|LARS1|PTRH2|PDP1|GPCPD1|APMAP|AARS2|DUSP16|TOE1|ACOT4|RAD9B|CILP2|PPTC7|THEM5	GRI-MGI_down

## Sheet: RSI-MGI
Table S6. Functional categories of DELs target genes in RSI-MGI
Category	GO	Description	LogP	Enrichment	#GeneInGOAndHitList	Hits	GeneList
GO Biological Processes	GO:0098659	inorganic cation import across plasma membrane	-6.2	5.5	13	ATP1B2|ATP2B4|ATP4A|CALCR|KCNJ8|SLC8A1|TRPM2|TRPV1|ABCC9|SLC39A14|SLC39A4|SLC12A9|MIR210	RSI-MGI_down
GO Biological Processes	GO:0099587	inorganic ion import across plasma membrane	-6.2	5.5	13	ATP1B2|ATP2B4|ATP4A|CALCR|KCNJ8|SLC8A1|TRPM2|TRPV1|ABCC9|SLC39A14|SLC39A4|SLC12A9|MIR210	RSI-MGI_down
GO Cellular Components	GO:0045177	apical part of cell	-5.6	2.6	29	AGER|ATP1B2|ATP2B1|BYSL|DLG1|DPP4|EGFR|SLC29A1|EPS15|FAP|HSP90AB1|KCNMA1|SLC11A2|PRKAA1|SLC4A2|SLC7A5|SORBS2|HOMER1|SLC23A1|NAALADL1|PATJ|MLC1|CDHR5|SLC39A4|SLC4A10|TRPV4|TCHP|MTDH|KNCN	RSI-MGI_down
GO Cellular Components	GO:0016324	apical plasma membrane	-5.2	2.7	25	AGER|ATP1B2|ATP2B1|DLG1|DPP4|EGFR|SLC29A1|EPS15|HSP90AB1|KCNMA1|SLC11A2|PRKAA1|SLC4A2|SLC7A5|SORBS2|SLC23A1|NAALADL1|PATJ|MLC1|CDHR5|SLC39A4|SLC4A10|TRPV4|MTDH|KNCN	RSI-MGI_down
GO Biological Processes	GO:0098739	import across plasma membrane	-4.8	4.1	13	ATP1B2|ATP2B4|ATP4A|CALCR|KCNJ8|SLC8A1|TRPM2|TRPV1|ABCC9|SLC39A14|SLC39A4|SLC12A9|MIR210	RSI-MGI_down
GO Biological Processes	GO:0006970	response to osmotic stress	-4.6	4.6	11	BAD|EGFR|EPO|HSP90AB1|KCNMA1|TLR3|TP53|MLC1|LRRC8A|TRPV4|RCSD1	RSI-MGI_down
GO Biological Processes	GO:0043161	proteasome-mediated ubiquitin-dependent protein catabolic process	-4.4	2.3	28	HSP90AB1|PSMD12|RNF5|SMARCC1|VCP|MTA1|TRIM13|HECW1|ECPAS|HSPBP1|FBXL2|WWTR1|FBXL6|FBXO5|UBE2S|DMAC2|FBXW7|CCAR2|TBL1XR1|TMUB1|SYVN1|FBXL20|TMEM67|AGAP3|FBXO39|FBXO45|DNAJC18|FBXL13	RSI-MGI_down
GO Cellular Components	GO:0048471	perinuclear region of cytoplasm	-4.3	2	40	ACHE|BTK|CDC5L|CENPF|DLG1|EGFR|EIF4E|GLB1|HRAS|HSF1|HSP90AB1|MAP1B|NFKBIE|SLC11A2|NTRK2|PAK2|STXBP1|VCP|SORBS2|TNFSF12|SYNJ2|ASIC3|TRIM13|PATJ|USP33|MLC1|GTPBP4|PRDX5|PKN3|CYHR1|TRMT112|FBXW7|NMRAL1|SBF2|C9orf24|ANKRD13A|MTDH|TAF8|CMYA5|TMEM173	RSI-MGI_down
GO Biological Processes	GO:1900119	positive regulation of execution phase of apoptosis	-4.3	12	5	ENDOG|FAP|HSF1|TP53|DLC1	RSI-MGI_down
GO Biological Processes	GO:0010498	proteasomal protein catabolic process	-4.2	2.2	30	HSP90AB1|PSMD12|RNF5|SCO1|SMARCC1|VCP|MTA1|TRIM13|RNF139|HECW1|ECPAS|HSPBP1|FBXL2|WWTR1|FBXL6|FBXO5|UBE2S|DMAC2|FBXW7|CCAR2|TBL1XR1|TMUB1|SYVN1|FBXL20|TMEM67|AGAP3|FBXO39|FBXO45|DNAJC18|FBXL13	RSI-MGI_down
GO Biological Processes	GO:0006511	ubiquitin-dependent protein catabolic process	-4.2	2	36	HSP90AB1|PSMD12|RNF5|SMARCC1|UBE2D2|VCP|MTA1|TRIM13|RNF139|RNF13|USP33|HECW1|ECPAS|HSPBP1|FBXL2|WWTR1|FBXL6|FBXO5|RNF11|UBE2S|VPS28|DMAC2|FBXW7|HACE1|USP37|CCAR2|TBL1XR1|TMUB1|SYVN1|FBXL20|TMEM67|AGAP3|FBXO39|FBXO45|DNAJC18|FBXL13	RSI-MGI_down
GO Biological Processes	GO:0044257	cellular protein catabolic process	-4.2	1.9	42	CTSW|FAP|HSP90AB1|PSMD12|RNF5|SCO1|SMARCC1|UBE2D2|VCP|VLDLR|RAB7A|MTA1|TRIM13|RNF139|RNF13|USP33|HECW1|ECPAS|HSPBP1|FBXL2|WWTR1|FBXL6|FBXO5|RNF11|UBE2S|VPS28|DMAC2|FBXW7|LAPTM4B|HACE1|USP37|CCAR2|TBL1XR1|TMUB1|SYVN1|FBXL20|TMEM67|AGAP3|FBXO39|FBXO45|DNAJC18|FBXL13	RSI-MGI_down
GO Molecular Functions	GO:0061630	ubiquitin protein ligase activity	-4.1	2.8	18	XIAP|NFX1|RNF5|MED7|MED20|TRIM13|RNF139|RNF13|HECW1|MGRN1|FBXL6|MED31|ASB2|HACE1|FBXO30|SYVN1|LRSAM1|ZSWIM2	RSI-MGI_down
GO Molecular Functions	GO:0046873	metal ion transmembrane transporter activity	-4.1	2.2	28	ATP1B2|ATP2B1|ATP2B4|ATP4A|CACNB1|ITGAV|KCNJ8|KCNMA1|SLC11A2|SLC8A1|SLC11A1|TRPM2|TRPV1|ASIC3|SLC23A1|ABCC9|SLC39A14|SEC61A1|KCNK4|TMEM38B|SLC39A4|SLC12A9|SLC4A10|TRPV4|CATSPER1|LRRC38|TRPV3|SLC13A5	RSI-MGI_down
GO Biological Processes	GO:0019941	modification-dependent protein catabolic process	-4.1	2	36	HSP90AB1|PSMD12|RNF5|SMARCC1|UBE2D2|VCP|MTA1|TRIM13|RNF139|RNF13|USP33|HECW1|ECPAS|HSPBP1|FBXL2|WWTR1|FBXL6|FBXO5|RNF11|UBE2S|VPS28|DMAC2|FBXW7|HACE1|USP37|CCAR2|TBL1XR1|TMUB1|SYVN1|FBXL20|TMEM67|AGAP3|FBXO39|FBXO45|DNAJC18|FBXL13	RSI-MGI_down
GO Biological Processes	GO:0042494	detection of bacterial lipoprotein	-4	26	3	TLR1|TLR6|SSC5D	RSI-MGI_down
GO Biological Processes	GO:0006884	cell volume homeostasis	-4	7.7	6	KCNMA1|SCT|LRRC8A|SLC12A9|TRPV4|ANO6	RSI-MGI_down
GO Biological Processes	GO:0043632	modification-dependent macromolecule catabolic process	-4	2	36	HSP90AB1|PSMD12|RNF5|SMARCC1|UBE2D2|VCP|MTA1|TRIM13|RNF139|RNF13|USP33|HECW1|ECPAS|HSPBP1|FBXL2|WWTR1|FBXL6|FBXO5|RNF11|UBE2S|VPS28|DMAC2|FBXW7|HACE1|USP37|CCAR2|TBL1XR1|TMUB1|SYVN1|FBXL20|TMEM67|AGAP3|FBXO39|FBXO45|DNAJC18|FBXL13	RSI-MGI_down
GO Biological Processes	GO:0051603	proteolysis involved in cellular protein catabolic process	-3.9	1.9	39	CTSW|FAP|HSP90AB1|PSMD12|RNF5|SCO1|SMARCC1|UBE2D2|VCP|MTA1|TRIM13|RNF139|RNF13|USP33|HECW1|ECPAS|HSPBP1|FBXL2|WWTR1|FBXL6|FBXO5|RNF11|UBE2S|VPS28|DMAC2|FBXW7|HACE1|USP37|CCAR2|TBL1XR1|TMUB1|SYVN1|FBXL20|TMEM67|AGAP3|FBXO39|FBXO45|DNAJC18|FBXL13	RSI-MGI_down
GO Biological Processes	GO:0010918	positive regulation of mitochondrial membrane potential	-3.9	14	4	BAD|CTNS|VCP|STOML2	RSI-MGI_down
GO Cellular Components	GO:0036513	Derlin-1 retrotranslocation complex	-3.9	14	4	RNF5|VCP|RNF139|SYVN1	RSI-MGI_down
GO Molecular Functions	GO:0061659	ubiquitin-like protein ligase activity	-3.9	2.7	18	XIAP|NFX1|RNF5|MED7|MED20|TRIM13|RNF139|RNF13|HECW1|MGRN1|FBXL6|MED31|ASB2|HACE1|FBXO30|SYVN1|LRSAM1|ZSWIM2	RSI-MGI_down
GO Molecular Functions	GO:0004842	ubiquitin-protein transferase activity	-3.9	2.3	25	XIAP|NFX1|RNF5|UBE2D2|MED7|MED20|TRIM13|RNF139|RNF13|HECW1|MGRN1|FBXL2|FBXL6|RNF11|UBE2S|MED31|ASB2|DMAC2|HACE1|FBXO30|SYVN1|FBXL20|LRSAM1|ZSWIM2|FBXL13	RSI-MGI_down
GO Biological Processes	GO:1900117	regulation of execution phase of apoptosis	-3.8	6	7	ENDOG|FAP|GCG|HSF1|PAK2|TP53|DLC1	RSI-MGI_down
GO Biological Processes	GO:0018105	peptidyl-serine phosphorylation	-3.8	2.4	21	ATP2B4|CALCR|DMD|EGFR|EIF4G1|EPO|GCG|HSP90AB1|IL11|NTRK2|PAK2|PFN2|PRKAA1|MAPK12|MKNK1|RPS6KA4|ROCK2|SH2D3C|STK38|PKN3|CAPRIN2	RSI-MGI_down
GO Cellular Components	GO:0030055	cell-substrate junction	-3.7	2.2	26	CAPN1|CFL1|DMD|DPP4|EGFR|ENG|FAP|FLNB|HMGA1|ITGAV|PLAUR|RPL19|SLC4A2|TRIP6|FZD1|SORBS2|MPZL1|AKAP12|GIT2|SORBS3|DLC1|USP33|CLASP1|APBB1IP|TRPV4|SPRY4	RSI-MGI_down
GO Biological Processes	GO:0033135	regulation of peptidyl-serine phosphorylation	-3.7	3.3	13	ATP2B4|CALCR|DMD|EGFR|EIF4G1|GCG|HSP90AB1|IL11|NTRK2|PFN2|PRKAA1|SH2D3C|CAPRIN2	RSI-MGI_down
GO Biological Processes	GO:0033138	positive regulation of peptidyl-serine phosphorylation	-3.7	3.7	11	ATP2B4|CALCR|EGFR|EIF4G1|GCG|HSP90AB1|IL11|NTRK2|PFN2|SH2D3C|CAPRIN2	RSI-MGI_down
GO Biological Processes	GO:0071502	cellular response to temperature stimulus	-3.6	21	3	TRPM2|TRPV1|KCNK4	RSI-MGI_down
GO Biological Processes	GO:0009896	positive regulation of catabolic process	-3.6	2.1	26	BAD|ENDOG|HNRNPD|HSF1|NSF|PFKFB3|PRKAA1|SCT|VCP|RAB7A|TNFSF12|ROCK2|TRIM13|RNF139|HECW1|TNRC6B|HSPBP1|GAPDHS|VPS28|FBXW7|LRSAM1|MTDH|SH3D19|YTHDF3|TMEM173|MIR210	RSI-MGI_down
GO Biological Processes	GO:0007169	transmembrane receptor protein tyrosine kinase signaling pathway	-3.6	1.8	38	BMP5|RUNX2|CCND3|EFNB3|EGFR|EPHB4|EPS15|HRAS|ITGAV|NTRK2|PAK2|PLAUR|POLR2H|PRKAA1|MAPK11|SDC2|SMARCC1|VIL1|RAB7A|MPZL1|FIBP|ROCK2|MTSS1|ABI1|NCBP2|EPN1|SLC2A8|MZB1|FBXW7|MYORG|SEMA6A|ZFYVE28|NIBAN2|SPRY4|ZFYVE27|IL31RA|CADM4|ENHO	RSI-MGI_down
Hallmark Gene Sets	M5942	HALLMARK UV RESPONSE DN	-3.6	3.1	13	ATP2B1|ATP2B4|DLG1|GRK5|KCNMA1|MAP1B|SDC2|TFPI|VLDLR|SYNJ2|MTA1|DLC1|WDR37	RSI-MGI_down
GO Biological Processes	GO:0022411	cellular component disassembly	-3.5	2	31	MRPL49|CAPN1|CFL1|DPP4|ENDOG|FAP|GSPT1|HMGA1|HSF1|KLKB1|MAP1B|MELTF|NSF|SMARCC1|TP53|VCP|VIL1|FZD1|SWAP70|MRPS27|CLASP1|DICER1|TRMT112|CHMP5|MTRF1L|FBXW7|TRPV4|MRPS25|ATG9B|TMEM173|KIF24	RSI-MGI_down
GO Biological Processes	GO:0034655	nucleobase-containing compound catabolic process	-3.5	1.9	35	EIF4G1|ENDOG|GSPT1|HNRNPD|HSF1|PFKFB3|PFKL|PRKAA1|PSMD12|RNH1|RPL19|RPL28|RPL37|SLC11A1|TP53|VCP|TNFSF13|ROCK2|FXR2|NUDT3|PKP3|NCBP2|TNRC6B|DICER1|GAPDHS|PRKAG2|DCP1A|SMG9|PRTFDC1|ADPRM|MUS81|NUDT16L1|TENT2|YTHDF3|MIR210	RSI-MGI_down
GO Biological Processes	GO:0006664	glycolipid metabolic process	-3.5	3.5	11	GLA|GLB1|PRKAA1|UGT8|NEU3|ST6GALNAC4|GLTP|PIGX|ESYT2|PIGO|GAL3ST3	RSI-MGI_down
GO Cellular Components	GO:0005925	focal adhesion	-3.5	2.1	25	CAPN1|CFL1|DPP4|EGFR|ENG|FAP|FLNB|HMGA1|ITGAV|PLAUR|RPL19|SLC4A2|TRIP6|FZD1|SORBS2|MPZL1|AKAP12|GIT2|SORBS3|DLC1|USP33|CLASP1|APBB1IP|TRPV4|SPRY4	RSI-MGI_down
GO Molecular Functions	GO:0019787	ubiquitin-like protein transferase activity	-3.5	2.1	25	XIAP|NFX1|RNF5|UBE2D2|MED7|MED20|TRIM13|RNF139|RNF13|HECW1|MGRN1|FBXL2|FBXL6|RNF11|UBE2S|MED31|ASB2|DMAC2|HACE1|FBXO30|SYVN1|FBXL20|LRSAM1|ZSWIM2|FBXL13	RSI-MGI_down
GO Biological Processes	GO:1903509	liposaccharide metabolic process	-3.5	3.5	11	GLA|GLB1|PRKAA1|UGT8|NEU3|ST6GALNAC4|GLTP|PIGX|ESYT2|PIGO|GAL3ST3	RSI-MGI_down
GO Biological Processes	GO:0070838	divalent metal ion transport	-3.4	2	28	ATP2B1|ATP2B4|CACNB1|CALCR|DMD|EPO|GCG|ITGAV|NOS3|SLC11A2|PLCB3|SLC8A1|SLC11A1|TRPM2|TRPV1|HOMER1|CALCRL|SLC39A14|SEC61A1|STOML2|TMEM38B|SLC39A4|TRPV4|CATSPER1|TRPV3|ANO6|STAC2|MIR210	RSI-MGI_down
GO Biological Processes	GO:0009167	purine ribonucleoside monophosphate metabolic process	-3.4	2.2	22	AK1|BAD|CTNS|DLG1|MYH3|NDUFB9|NDUFS4|NDUFS5|PFKFB3|PFKL|PRKAA1|TP53|VCP|NUDT3|AK5|GAPDHS|STOML2|PRKAG2|PRTFDC1|ADSS1|ATPSCKMT|MIR210	RSI-MGI_down
GO Cellular Components	GO:0005924	cell-substrate adherens junction	-3.4	2.1	25	CAPN1|CFL1|DPP4|EGFR|ENG|FAP|FLNB|HMGA1|ITGAV|PLAUR|RPL19|SLC4A2|TRIP6|FZD1|SORBS2|MPZL1|AKAP12|GIT2|SORBS3|DLC1|USP33|CLASP1|APBB1IP|TRPV4|SPRY4	RSI-MGI_down
GO Biological Processes	GO:0098703	calcium ion import across plasma membrane	-3.4	11	4	ATP2B4|CALCR|TRPM2|TRPV1	RSI-MGI_down
GO Biological Processes	GO:0047484	regulation of response to osmotic stress	-3.4	11	4	BAD|EPO|MLC1|TRPV4	RSI-MGI_down
GO Biological Processes	GO:0009126	purine nucleoside monophosphate metabolic process	-3.4	2.2	22	AK1|BAD|CTNS|DLG1|MYH3|NDUFB9|NDUFS4|NDUFS5|PFKFB3|PFKL|PRKAA1|TP53|VCP|NUDT3|AK5|GAPDHS|STOML2|PRKAG2|PRTFDC1|ADSS1|ATPSCKMT|MIR210	RSI-MGI_down
KEGG Pathway	hsa05160	Hepatitis C	-3.4	3.2	12	BAD|EGFR|HRAS|IRF7|MAPK11|MAPK12|SOS2|TLR3|TP53|CLDN6|CLDN9|CLDN19	RSI-MGI_down
GO Cellular Components	GO:0071438	invadopodium membrane	-3.4	17	3	DPP4|FAP|PLAUR	RSI-MGI_down
GO Biological Processes	GO:0060022	hard palate development	-3.4	17	3	DLG1|FZD1|MMP25	RSI-MGI_down
GO Biological Processes	GO:0018209	peptidyl-serine modification	-3.4	2.3	21	ATP2B4|CALCR|DMD|EGFR|EIF4G1|EPO|GCG|HSP90AB1|IL11|NTRK2|PAK2|PFN2|PRKAA1|MAPK12|MKNK1|RPS6KA4|ROCK2|SH2D3C|STK38|PKN3|CAPRIN2	RSI-MGI_down
GO Biological Processes	GO:0072511	divalent inorganic cation transport	-3.3	2	28	ATP2B1|ATP2B4|CACNB1|CALCR|DMD|EPO|GCG|ITGAV|NOS3|SLC11A2|PLCB3|SLC8A1|SLC11A1|TRPM2|TRPV1|HOMER1|CALCRL|SLC39A14|SEC61A1|STOML2|TMEM38B|SLC39A4|TRPV4|CATSPER1|TRPV3|ANO6|STAC2|MIR210	RSI-MGI_down
GO Cellular Components	GO:0031253	cell projection membrane	-3.3	2.2	22	ATP2B1|CFL1|DLG1|DMD|DPP4|EPS15|FAP|B4GALT1|HSP90AB1|ITGAV|SLC11A2|PLAUR|SLC3A1|TRPV1|DLC1|CDHR5|TSPEAR|TRPV4|SPRY4|TMEM67|FGD5|SHISA7	RSI-MGI_down
GO Biological Processes	GO:0070509	calcium ion import	-3.3	3.9	9	ATP2B4|CALCR|GCG|SLC8A1|TRPM2|TRPV1|HOMER1|TRPV4|TRPV3	RSI-MGI_down
GO Cellular Components	GO:0019005	SCF ubiquitin ligase complex	-3.3	4.3	8	FBXL2|FBXL6|DMAC2|FBXW7|FBXL20|FBXO39|FBXO45|FBXL13	RSI-MGI_down
GO Biological Processes	GO:1902656	calcium ion import into cytosol	-3.3	10	4	ATP2B4|CALCR|TRPM2|TRPV1	RSI-MGI_down
GO Biological Processes	GO:0060348	bone development	-3.3	2.6	16	BMPR1B|RUNX2|FOXN3|MEGF8|ENG|THPO|TP53|ABI1|LRRC17|TMEM38B|FBXW7|TRPV4|P3H1|ASXL1|ANO6|SCX	RSI-MGI_down
GO Biological Processes	GO:0009161	ribonucleoside monophosphate metabolic process	-3.2	2.2	22	AK1|BAD|CTNS|DLG1|MYH3|NDUFB9|NDUFS4|NDUFS5|PFKFB3|PFKL|PRKAA1|TP53|VCP|NUDT3|AK5|GAPDHS|STOML2|PRKAG2|PRTFDC1|ADSS1|ATPSCKMT|MIR210	RSI-MGI_down
GO Biological Processes	GO:0046700	heterocycle catabolic process	-3.2	1.8	36	BLVRA|EIF4G1|ENDOG|GSPT1|HNRNPD|HSF1|PFKFB3|PFKL|PRKAA1|PSMD12|RNH1|RPL19|RPL28|RPL37|SLC11A1|TP53|VCP|TNFSF13|ROCK2|FXR2|NUDT3|PKP3|NCBP2|TNRC6B|DICER1|GAPDHS|PRKAG2|DCP1A|SMG9|PRTFDC1|ADPRM|MUS81|NUDT16L1|TENT2|YTHDF3|MIR210	RSI-MGI_down
GO Biological Processes	GO:0044270	cellular nitrogen compound catabolic process	-3.2	1.8	36	BLVRA|EIF4G1|ENDOG|GSPT1|HNRNPD|HSF1|PFKFB3|PFKL|PRKAA1|PSMD12|RNH1|RPL19|RPL28|RPL37|SLC11A1|TP53|VCP|TNFSF13|ROCK2|FXR2|NUDT3|PKP3|NCBP2|TNRC6B|DICER1|GAPDHS|PRKAG2|DCP1A|SMG9|PRTFDC1|ADPRM|MUS81|NUDT16L1|TENT2|YTHDF3|MIR210	RSI-MGI_down
GO Biological Processes	GO:0045838	positive regulation of membrane potential	-3.1	9.3	4	BAD|CTNS|VCP|STOML2	RSI-MGI_down
GO Biological Processes	GO:0007519	skeletal muscle tissue development	-3.1	2.8	13	FLNB|HLF|PRKAA1|HOMER1|ANKRD2|ANKRD1|ASB2|BIN3|GPCPD1|MYORG|NIBAN2|AKIRIN1|SCX	RSI-MGI_down
GO Biological Processes	GO:0014832	urinary bladder smooth muscle contraction	-3.1	15	3	ATP2B4|KCNMA1|TRPV1	RSI-MGI_down
GO Biological Processes	GO:0014848	urinary tract smooth muscle contraction	-3.1	15	3	ATP2B4|KCNMA1|TRPV1	RSI-MGI_down
GO Biological Processes	GO:0032493	response to bacterial lipoprotein	-3.1	15	3	TLR1|TLR6|SSC5D	RSI-MGI_down
GO Biological Processes	GO:0032876	negative regulation of DNA endoreduplication	-3.1	15	3	STAG2|FBXO5|FBXW7	RSI-MGI_down
GO Biological Processes	GO:1902416	positive regulation of mRNA binding	-3.1	15	3	CDK9|EIF4G1|LARP6	RSI-MGI_down
GO Cellular Components	GO:0043235	receptor complex	-3.1	1.9	28	BMPR1B|CALCR|CD247|DLG1|EGFR|ENG|EPHB4|HSP90AB1|IL2RA|IL6ST|ITGAE|ITGAV|NTRK2|TRAV6|TLR1|TM7SF2|VLDLR|CALCRL|TLR6|TRAV16|TRAV4|STOML2|APBB1IP|PLXDC1|CAPRIN2|IL31RA|TRPV3|SHISA7	RSI-MGI_down
GO Biological Processes	GO:0008593	regulation of Notch signaling pathway	-3.1	3.3	10	EGFR|GATA2|IL6ST|NOS3|NOTCH4|TSPAN5|TSPEAR|FBXW7|NIBAN2|ENHO	RSI-MGI_down
GO Biological Processes	GO:0019439	aromatic compound catabolic process	-3	1.8	36	BLVRA|EIF4G1|ENDOG|GSPT1|HNRNPD|HSF1|PFKFB3|PFKL|PRKAA1|PSMD12|RNH1|RPL19|RPL28|RPL37|SLC11A1|TP53|VCP|TNFSF13|ROCK2|FXR2|NUDT3|PKP3|NCBP2|TNRC6B|DICER1|GAPDHS|PRKAG2|DCP1A|SMG9|PRTFDC1|ADPRM|MUS81|NUDT16L1|TENT2|YTHDF3|MIR210	RSI-MGI_down
GO Biological Processes	GO:0002021	response to dietary excess	-3	6.5	5	SCT|TRPV1|TRPV4|TBL1XR1|RMI1	RSI-MGI_down
GO Cellular Components	GO:0070161	anchoring junction	-3	1.9	30	CAPN1|CFL1|DLG1|DPP4|EGFR|ENG|FAP|FLNB|B4GALT1|HMGA1|ITGAV|PLAUR|RPL19|SLC4A2|TRIP6|FZD1|SORBS2|MPZL1|AKAP12|GIT2|SORBS3|DLC1|PKP3|USP33|CLASP1|APBB1IP|TRPV4|NIBAN2|SPRY4|TCHP	RSI-MGI_down
GO Molecular Functions	GO:0022890	inorganic cation transmembrane transporter activity	-3	1.8	31	ATP1B2|ATP2B1|ATP2B4|ATP4A|CACNB1|ITGAV|KCNJ8|KCNMA1|SLC11A2|SLC8A1|SLC11A1|TRPM2|TRPV1|ASIC3|SLC23A1|ABCC9|SLC39A14|SEC61A1|SLC2A8|KCNK4|TMEM38B|TMEM63B|SLC39A4|SLC12A9|SLC4A10|TRPV4|CATSPER1|LRRC38|TRPV3|ANO6|SLC13A5	RSI-MGI_down
GO Biological Processes	GO:0098662	inorganic cation transmembrane transport	-3	1.7	37	ATP1B2|ATP2B4|ATP4A|CACNB1|CALCR|DLG1|DMD|ITGAV|KCNJ8|KCNMA1|SLC11A2|PLCB3|SLC8A1|SLC11A1|TRPM2|TRPV1|ASIC3|SLC23A1|ABCC9|HECW1|SLC39A14|SEC61A1|SLC2A8|STOML2|KCNK4|TMEM38B|SLC39A4|SLC12A9|SLC4A10|TRPV4|CATSPER1|LRRC38|ATPSCKMT|TRPV3|ANO6|STAC2|MIR210	RSI-MGI_down
GO Cellular Components	GO:1990234	transferase complex	-3	1.7	38	CCND3|CDK9|E2F6|PFKL|CDK14|POLD2|POLR2H|PRKAA1|RPN1|SNRPE|TP53|UBE2D2|SUPT3H|RUVBL1|MED7|MED20|ZER1|USP33|KDM6B|KAT6B|PDSS1|FBXL2|FBXL6|RNF11|UBE2S|MED31|PRKAG2|ASB2|DMAC2|FBXW7|EPC1|SYVN1|FBXL20|TAF8|FBXO39|TENT2|FBXO45|FBXL13	RSI-MGI_down
GO Biological Processes	GO:0009612	response to mechanical stimulus	-2.9	2.5	15	BAD|DMD|EGFR|ENDOG|ENG|MAP1B|SLC8A1|TLR3|FOSL1|ASIC3|PHF24|ANKRD1|KCNK4|TRPV4|SCX	RSI-MGI_down
GO Molecular Functions	GO:0030235	nitric-oxide synthase regulator activity	-2.9	13	3	ATP2B4|EGFR|HSP90AB1	RSI-MGI_down
GO Biological Processes	GO:1905216	positive regulation of RNA binding	-2.9	13	3	CDK9|EIF4G1|LARP6	RSI-MGI_down
GO Biological Processes	GO:0048539	bone marrow development	-2.9	13	3	TP53|LRRC17|ASXL1	RSI-MGI_down
GO Biological Processes	GO:0061041	regulation of wound healing	-2.9	2.8	12	AGER|FAP|HRAS|KLKB1|NOS3|PLAUR|TFPI|VIL1|CLASP1|TNFRSF12A|ANO6|CADM4	RSI-MGI_down
GO Cellular Components	GO:0099524	postsynaptic cytosol	-2.9	8.2	4	EIF4E|PLCB3|HOMER1|FBXO45	RSI-MGI_down
GO Biological Processes	GO:1904380	endoplasmic reticulum mannose trimming	-2.9	8.2	4	RNF5|TRIM13|RNF139|SYVN1	RSI-MGI_down
GO Biological Processes	GO:0010715	regulation of extracellular matrix disassembly	-2.9	8.2	4	DPP4|FAP|MELTF|CLASP1	RSI-MGI_down
GO Biological Processes	GO:0006883	cellular sodium ion homeostasis	-2.9	8.2	4	ATP1B2|ATP4A|C7|SLC8A1	RSI-MGI_down
GO Biological Processes	GO:0060538	skeletal muscle organ development	-2.9	2.7	13	FLNB|HLF|PRKAA1|HOMER1|ANKRD2|ANKRD1|ASB2|BIN3|GPCPD1|MYORG|NIBAN2|AKIRIN1|SCX	RSI-MGI_down
GO Biological Processes	GO:0006939	smooth muscle contraction	-2.9	3.2	10	ATP2B1|ATP2B4|DLG1|HTR7|KCNMA1|RAP1GDS1|SLC8A1|TRPV1|ROCK2|CALCRL	RSI-MGI_down
GO Biological Processes	GO:0001503	ossification	-2.9	2	23	ACHE|ATP2B1|BMP5|BMPR1B|RUNX2|EGFR|ESRRA|IL6ST|SMAD6|SLC8A1|FZD1|CHRD|LRRC17|GTPBP4|CHRDL2|WWTR1|RSL1D1|FBXO5|TMEM38B|KREMEN2|ANO6|MIR210|SCX	RSI-MGI_down
GO Biological Processes	GO:0034599	cellular response to oxidative stress	-2.9	2.2	19	NUDT2|BTK|EGFR|ENDOG|HNRNPD|HSF1|NOS3|PRKAA1|TP53|TRPM2|FZD1|TLR6|PRDX3|KDM6B|PRDX5|ANKRD2|SLC25A24|FBXW7|AGAP3	RSI-MGI_down
GO Biological Processes	GO:0009123	nucleoside monophosphate metabolic process	-2.9	2	22	AK1|BAD|CTNS|DLG1|MYH3|NDUFB9|NDUFS4|NDUFS5|PFKFB3|PFKL|PRKAA1|TP53|VCP|NUDT3|AK5|GAPDHS|STOML2|PRKAG2|PRTFDC1|ADSS1|ATPSCKMT|MIR210	RSI-MGI_down
GO Cellular Components	GO:0000151	ubiquitin ligase complex	-2.9	2.2	18	UBE2D2|MED7|MED20|ZER1|USP33|FBXL2|FBXL6|RNF11|UBE2S|MED31|ASB2|DMAC2|FBXW7|SYVN1|FBXL20|FBXO39|FBXO45|FBXL13	RSI-MGI_down
GO Biological Processes	GO:0019058	viral life cycle	-2.8	2.1	20	DPP4|EFNB3|EGFR|EPS15|GPR15|HSP90AB1|ITGAV|KPNA3|VCP|RAB7A|BANF1|CLDN6|CLDN9|ROCK2|TRIM13|SIVA1|FBXL2|VPS28|CHMP5|LRSAM1	RSI-MGI_down
GO Biological Processes	GO:0007219	Notch signaling pathway	-2.8	2.5	14	EGFR|GATA2|IL2RA|IL6ST|NOS3|NOTCH4|SORBS2|TSPAN5|SUSD5|EPN1|TSPEAR|FBXW7|NIBAN2|ENHO	RSI-MGI_down
GO Biological Processes	GO:0061077	chaperone-mediated protein folding	-2.8	4.1	7	BAG1|FKBP5|CRTAP|DNAJB5|TOR2A|P3H1|DNAJC18	RSI-MGI_down
GO Molecular Functions	GO:0104005	hijacked molecular function	-2.8	3.7	8	DPP4|EFNB3|EGFR|GPR15|ITGAV|CLDN6|CLDN9|SIVA1	RSI-MGI_down
GO Molecular Functions	GO:0001618	virus receptor activity	-2.8	3.7	8	DPP4|EFNB3|EGFR|GPR15|ITGAV|CLDN6|CLDN9|SIVA1	RSI-MGI_down
GO Biological Processes	GO:0006914	autophagy	-2.8	1.9	27	BAD|VPS51|CAPN1|EIF4E|EIF4G1|PRKAA1|RNF5|TP53|VCP|RAB7A|PLEKHM1|TRIM13|USP33|PACS2|FBXL2|MTERF3|VPS28|PRKAG2|FBXW7|MTMR8|RRAGC|SBF2|HDAC10|LRSAM1|MTDH|ATG9B|TMEM173	RSI-MGI_down
GO Biological Processes	GO:0061919	process utilizing autophagic mechanism	-2.8	1.9	27	BAD|VPS51|CAPN1|EIF4E|EIF4G1|PRKAA1|RNF5|TP53|VCP|RAB7A|PLEKHM1|TRIM13|USP33|PACS2|FBXL2|MTERF3|VPS28|PRKAG2|FBXW7|MTMR8|RRAGC|SBF2|HDAC10|LRSAM1|MTDH|ATG9B|TMEM173	RSI-MGI_down
GO Biological Processes	GO:0043043	peptide biosynthetic process	-2.8	1.7	36	MRPL49|DMD|EGFR|EIF4A1|EIF4E|EIF4G1|GSPT1|HNRNPD|NOTCH4|GATB|RPL19|RPL28|RPL37|MKNK1|EIF3F|ROCK2|FXR2|PKP3|RNF139|NCBP2|MRPS27|TNRC6B|METAP1|MTERF3|PAIP2|TRMT112|MTRF1L|RMND1|LARP6|AARS2|EEFSEC|MRPS25|CAPRIN2|EIF1AD|YTHDF3|MIR210	RSI-MGI_down
GO Biological Processes	GO:0120193	tight junction organization	-2.8	4.1	7	DLG1|CLDN9|ROCK2|PATJ|MTDH|CLDN19|GPBAR1	RSI-MGI_down
GO Biological Processes	GO:0006412	translation	-2.8	1.7	35	MRPL49|EGFR|EIF4A1|EIF4E|EIF4G1|GSPT1|HNRNPD|NOTCH4|GATB|RPL19|RPL28|RPL37|MKNK1|EIF3F|ROCK2|FXR2|PKP3|RNF139|NCBP2|MRPS27|TNRC6B|METAP1|MTERF3|PAIP2|TRMT112|MTRF1L|RMND1|LARP6|AARS2|EEFSEC|MRPS25|CAPRIN2|EIF1AD|YTHDF3|MIR210	RSI-MGI_down
GO Biological Processes	GO:0031146	SCF-dependent proteasomal ubiquitin-dependent protein catabolic process	-2.8	3.3	9	PSMD12|FBXL2|WWTR1|FBXL6|DMAC2|FBXW7|FBXL20|FBXO39|FBXL13	RSI-MGI_down
GO Biological Processes	GO:0031023	microtubule organizing center organization	-2.8	2.9	11	KIF3B|ROCK2|USP33|CLASP1|SAC3D1|CHMP5|HAUS3|BRSK1|TMEM67|DEUP1|HEPACAM2	RSI-MGI_down
GO Molecular Functions	GO:0000774	adenyl-nucleotide exchange factor activity	-2.8	12	3	BAG1|HSPBP1|SIL1	RSI-MGI_down
GO Biological Processes	GO:0036363	transforming growth factor beta activation	-2.8	12	3	HSP90AB1|ITGAV|NRROS	RSI-MGI_down
GO Biological Processes	GO:0019043	establishment of viral latency	-2.8	12	3	HMGA1|IRF7|BANF1	RSI-MGI_down
GO Biological Processes	GO:1902415	regulation of mRNA binding	-2.8	12	3	CDK9|EIF4G1|LARP6	RSI-MGI_down
GO Molecular Functions	GO:0005381	iron ion transmembrane transporter activity	-2.8	12	3	SLC11A2|SLC11A1|SLC39A14	RSI-MGI_down
GO Biological Processes	GO:0030433	ubiquitin-dependent ERAD pathway	-2.8	3.6	8	RNF5|VCP|TRIM13|ECPAS|TMUB1|SYVN1|TMEM67|DNAJC18	RSI-MGI_down
GO Biological Processes	GO:0034755	iron ion transmembrane transport	-2.7	7.3	4	SLC11A2|SLC11A1|SLC39A14|MIR210	RSI-MGI_down
GO Biological Processes	GO:0007517	muscle organ development	-2.7	2	23	ACHE|CENPF|DMD|ENG|FLNB|HLF|MYH3|POU6F1|PRKAA1|MAPK11|MAPK12|FZD1|HOMER1|ANKRD2|ANKRD1|ASB2|BIN3|GPCPD1|MYORG|NIBAN2|AKIRIN1|PTCD2|SCX	RSI-MGI_down
GO Biological Processes	GO:0071417	cellular response to organonitrogen compound	-2.7	1.8	30	AGER|ATP2B1|ATP2B4|CACNB1|CCND3|CDC5L|EGFR|ESRRA|GCG|HNRNPD|HSF1|LPL|MAP1B|NTRK2|PRKAA1|SLC8A1|SMARCC1|TP53|TRPM2|TRPV1|ROCK2|TLR6|SLC2A8|MZB1|KLF3|CHMP5|TMEM38B|NMRAL1|RRAGC|ENHO	RSI-MGI_down
GO Biological Processes	GO:0035196	production of miRNAs involved in gene silencing by miRNA	-2.7	4.5	6	EGFR|TP53|DICER1|ZC3H7A|SPOUT1|SRRT	RSI-MGI_down
GO Biological Processes	GO:0009266	response to temperature stimulus	-2.7	2.3	16	ATP2B1|BAG1|HSF1|HSP90AB1|LPL|NOS3|PRKAA1|TRPM2|VCP|TRPV1|ASIC3|KCNK4|CCAR2|TRPV4|TRPV3|PIRT	RSI-MGI_down
GO Biological Processes	GO:0050821	protein stabilization	-2.7	2.5	13	ATP1B2|HSP90AB1|PFN2|STXBP1|TP53|CRTAP|CCT5|USP33|GTPBP4|FBXW7|FKBPL|P3H1|SYVN1	RSI-MGI_down
GO Biological Processes	GO:0045216	cell-cell junction organization	-2.7	2.7	12	DLG1|UGT8|CLDN6|CLDN9|ROCK2|PATJ|PKP3|TRPV4|MTDH|CLDN19|GPBAR1|SDK1	RSI-MGI_down
GO Biological Processes	GO:0030509	BMP signaling pathway	-2.7	2.7	12	XIAP|BMP5|BMPR1B|RUNX2|MEGF8|ENG|SMAD6|SFRP5|FZD1|CHRD|GDF6|SCX	RSI-MGI_down
GO Molecular Functions	GO:0008324	cation transmembrane transporter activity	-2.7	1.7	32	ATP1B2|ATP2B1|ATP2B4|ATP4A|CACNB1|ITGAV|KCNJ8|KCNMA1|SLC11A2|SLC8A1|SLC11A1|TRPM2|TRPV1|SLC7A5|ASIC3|SLC23A1|ABCC9|SLC39A14|SEC61A1|SLC2A8|KCNK4|TMEM38B|TMEM63B|SLC39A4|SLC12A9|SLC4A10|TRPV4|CATSPER1|LRRC38|TRPV3|ANO6|SLC13A5	RSI-MGI_down
GO Biological Processes	GO:0071496	cellular response to external stimulus	-2.7	2.1	20	ATP2B1|BAD|CD68|EGFR|EIF4G1|ENG|HSF1|LPL|PRKAA1|TLR3|TP53|TRPV1|FOSL1|USP33|ANKRD1|KCNK4|SLC39A4|NMRAL1|RRAGC|SCX	RSI-MGI_down
GO Biological Processes	GO:1903034	regulation of response to wounding	-2.7	2.5	13	AGER|FAP|HRAS|KLKB1|NOS3|PLAUR|PTPRF|TFPI|VIL1|CLASP1|TNFRSF12A|ANO6|CADM4	RSI-MGI_down
GO Biological Processes	GO:0009135	purine nucleoside diphosphate metabolic process	-2.7	2.8	11	AK1|BAD|DLG1|PFKFB3|PFKL|PRKAA1|TP53|AK5|GAPDHS|PRKAG2|MIR210	RSI-MGI_down
GO Biological Processes	GO:0009179	purine ribonucleoside diphosphate metabolic process	-2.7	2.8	11	AK1|BAD|DLG1|PFKFB3|PFKL|PRKAA1|TP53|AK5|GAPDHS|PRKAG2|MIR210	RSI-MGI_down
GO Biological Processes	GO:1901361	organic cyclic compound catabolic process	-2.7	1.7	36	BLVRA|EIF4G1|ENDOG|GSPT1|HNRNPD|HSF1|PFKFB3|PFKL|PRKAA1|PSMD12|RNH1|RPL19|RPL28|RPL37|SLC11A1|TP53|VCP|TNFSF13|ROCK2|FXR2|NUDT3|PKP3|NCBP2|TNRC6B|DICER1|GAPDHS|PRKAG2|DCP1A|SMG9|PRTFDC1|ADPRM|MUS81|NUDT16L1|TENT2|YTHDF3|MIR210	RSI-MGI_down
GO Molecular Functions	GO:0015085	calcium ion transmembrane transporter activity	-2.6	2.8	11	ATP2B1|ATP2B4|CACNB1|ITGAV|SLC8A1|TRPM2|TRPV1|SEC61A1|TRPV4|CATSPER1|TRPV3	RSI-MGI_down
GO Cellular Components	GO:0044437	vacuolar part	-2.6	1.8	29	CD68|CTNS|DPP4|B4GALT1|GLA|GLB1|HSP90AB1|SLC11A2|NSF|SDC2|SLC3A1|TLR3|TRPM2|VCP|VLDLR|RAB7A|CREG1|GGH|PPT2|PLEKHM1|RNF13|MMD|CDIP1|SLC2A8|LAPTM4B|RRAGC|SBF2|ATG9B|TMEM173	RSI-MGI_down
GO Biological Processes	GO:0036503	ERAD pathway	-2.6	3.1	9	RNF5|VCP|TRIM13|RNF139|ECPAS|TMUB1|SYVN1|TMEM67|DNAJC18	RSI-MGI_down
GO Biological Processes	GO:0051194	positive regulation of cofactor metabolic process	-2.6	5.3	5	PFKFB3|PRKAA1|ZNF205|GAPDHS|MIR210	RSI-MGI_down
GO Molecular Functions	GO:0019900	kinase binding	-2.6	1.7	35	ATP2B4|BAD|CCND3|CD247|CDC5L|CDK9|DLG1|EGFR|GRK5|HSF1|HSP90AB1|ITGAV|LIPE|NSF|PAK2|PFKL|PTPN14|STXBP1|TP53|TRIP6|PRDX3|STK38|FBXO5|ANKRD2|PRKAG2|LAX1|LAPTM4B|USP37|TRPV4|PITPNM3|BRSK1|FIZ1|IL31RA|CADM4|TMEM173	RSI-MGI_down
GO Biological Processes	GO:0009185	ribonucleoside diphosphate metabolic process	-2.6	2.7	11	AK1|BAD|DLG1|PFKFB3|PFKL|PRKAA1|TP53|AK5|GAPDHS|PRKAG2|MIR210	RSI-MGI_down
GO Biological Processes	GO:0035725	sodium ion transmembrane transport	-2.6	2.7	11	ATP1B2|ATP2B4|ATP4A|DLG1|DMD|SLC8A1|TRPM2|ASIC3|SLC23A1|HECW1|ANO6	RSI-MGI_down
GO Biological Processes	GO:0010107	potassium ion import	-2.6	4.4	6	ATP1B2|ATP4A|DLG1|KCNJ8|ABCC9|SLC12A9	RSI-MGI_down
GO Molecular Functions	GO:0019901	protein kinase binding	-2.6	1.7	32	ATP2B4|BAD|CCND3|CD247|CDC5L|CDK9|DLG1|EGFR|GRK5|HSF1|HSP90AB1|ITGAV|LIPE|NSF|PAK2|PTPN14|STXBP1|TP53|PRDX3|STK38|FBXO5|ANKRD2|PRKAG2|LAX1|USP37|TRPV4|PITPNM3|BRSK1|FIZ1|IL31RA|CADM4|TMEM173	RSI-MGI_down
GO Biological Processes	GO:1901699	cellular response to nitrogen compound	-2.6	1.7	32	AGER|ATP2B1|ATP2B4|CACNB1|CCND3|CDC5L|EGFR|ESRRA|GCG|HNRNPD|HSF1|LPL|MAP1B|NTRK2|PRKAA1|SLC8A1|SMARCC1|TLR3|TP53|TRPM2|TRPV1|ROCK2|TLR6|SLC2A8|MZB1|KLF3|CHMP5|TMEM38B|NMRAL1|RRAGC|TMEM173|ENHO	RSI-MGI_down
GO Biological Processes	GO:0032875	regulation of DNA endoreduplication	-2.6	10	3	STAG2|FBXO5|FBXW7	RSI-MGI_down
GO Biological Processes	GO:0008216	spermidine metabolic process	-2.6	10	3	AMD1|HDAC10|SAT2	RSI-MGI_down
GO Cellular Components	GO:0005912	adherens junction	-2.6	1.8	28	CAPN1|CFL1|DLG1|DPP4|EGFR|ENG|FAP|FLNB|HMGA1|ITGAV|PLAUR|RPL19|SLC4A2|TRIP6|FZD1|SORBS2|MPZL1|AKAP12|GIT2|SORBS3|DLC1|PKP3|USP33|CLASP1|APBB1IP|TRPV4|NIBAN2|SPRY4	RSI-MGI_down
GO Biological Processes	GO:0006457	protein folding	-2.6	2.3	15	BAG1|FKBP5|HSP90AB1|VCP|SELENOF|MPDU1|CRTAP|CCT5|HSPBP1|DNAJB5|TOR2A|P3H1|SIL1|DNAJC18|DNAJC25	RSI-MGI_down
GO Biological Processes	GO:0140115	export across plasma membrane	-2.6	5.1	5	ATP1B2|ATP4A|DLG1|SLC8A1|ANO6	RSI-MGI_down
GO Biological Processes	GO:0001816	cytokine production	-2.6	1.6	37	AGER|ATP2B1|BTK|CD247|DLG1|FFAR2|HRAS|HSF1|HSP90AB1|IL6ST|IRF7|ITGAV|ITK|LPL|POLR2H|MAPK11|SLC11A1|TLR1|TLR3|RPS6KA4|ROCK2|AKAP12|TLR6|AGPAT1|DICER1|ANKRD2|STOML2|LAPTM4B|PANX2|SIGIRR|TRPV4|GPSM3|TLR10|HAVCR2|SSC5D|TMEM173|NRROS	RSI-MGI_down
GO Biological Processes	GO:0036508	protein alpha-1,2-demannosylation	-2.6	6.6	4	RNF5|TRIM13|RNF139|SYVN1	RSI-MGI_down
GO Biological Processes	GO:0036507	protein demannosylation	-2.6	6.6	4	RNF5|TRIM13|RNF139|SYVN1	RSI-MGI_down
GO Biological Processes	GO:0046718	viral entry into host cell	-2.6	2.9	10	DPP4|EFNB3|EGFR|EPS15|GPR15|ITGAV|KPNA3|CLDN6|CLDN9|SIVA1	RSI-MGI_down
GO Biological Processes	GO:0006687	glycosphingolipid metabolic process	-2.6	3.7	7	GLA|GLB1|PRKAA1|UGT8|NEU3|GLTP|ESYT2	RSI-MGI_down
KEGG Pathway	hsa04660	T cell receptor signaling pathway	-2.5	3	9	CD247|DLG1|HRAS|ITK|NFKBIE|PAK2|MAPK11|MAPK12|SOS2	RSI-MGI_down
GO Biological Processes	GO:0060041	retina development in camera-type eye	-2.5	2.7	11	ACHE|ATP2B1|ATP2B4|BMPR1B|CLCN2|NTRK2|TUB|TULP1|TENT2|SDK1|LAMA1	RSI-MGI_down
GO Molecular Functions	GO:0008135	translation factor activity, RNA binding	-2.5	3.3	8	EIF4A1|EIF4E|EIF4G1|GSPT1|EIF3F|MTRF1L|EEFSEC|EIF1AD	RSI-MGI_down
GO Biological Processes	GO:0051701	interaction with host	-2.5	2.3	14	BAD|DPP4|EFNB3|EGFR|EPS15|GPR15|ITGAV|KPNA3|RAB7A|CLDN6|CLDN9|TRIM13|SIVA1|THOC6	RSI-MGI_down
KEGG Pathway	hsa04141	Protein processing in endoplasmic reticulum	-2.5	2.5	12	BAG1|CAPN1|ATF6B|HSP90AB1|RNF5|RPN1|UBE2D2|VCP|HSPBP1|SEC61A1|SIL1|SYVN1	RSI-MGI_down
GO Biological Processes	GO:0000302	response to reactive oxygen species	-2.5	2.2	15	BAD|BTK|EGFR|ENDOG|HNRNPD|HSF1|NOS3|PRKAA1|SLC8A1|TRPM2|FOSL1|PRDX3|KDM6B|PRDX5|AGAP3	RSI-MGI_down
GO Cellular Components	GO:0031258	lamellipodium membrane	-2.5	6.3	4	CFL1|DPP4|FAP|ITGAV	RSI-MGI_down
GO Biological Processes	GO:0007098	centrosome cycle	-2.5	2.8	10	KIF3B|ROCK2|USP33|SAC3D1|CHMP5|HAUS3|BRSK1|TMEM67|DEUP1|HEPACAM2	RSI-MGI_down
GO Biological Processes	GO:0046185	aldehyde catabolic process	-2.5	9.5	3	ADH5|PNKD|HOGA1	RSI-MGI_down
GO Biological Processes	GO:0019042	viral latency	-2.5	9.5	3	HMGA1|IRF7|BANF1	RSI-MGI_down
GO Biological Processes	GO:0042023	DNA endoreduplication	-2.5	9.5	3	STAG2|FBXO5|FBXW7	RSI-MGI_down
GO Biological Processes	GO:1905214	regulation of RNA binding	-2.5	9.5	3	CDK9|EIF4G1|LARP6	RSI-MGI_down
GO Biological Processes	GO:0032490	detection of molecule of bacterial origin	-2.5	9.5	3	TLR1|TLR6|SSC5D	RSI-MGI_down
GO Biological Processes	GO:0031050	dsRNA processing	-2.5	4.1	6	EGFR|TP53|DICER1|ZC3H7A|SPOUT1|SRRT	RSI-MGI_down
KEGG Pathway	hsa04978	Mineral absorption	-2.5	4.1	6	ATP1B2|ATP2B1|CLCN2|SLC11A2|SLC8A1|SLC39A4	RSI-MGI_down
GO Biological Processes	GO:0070918	production of small RNA involved in gene silencing by RNA	-2.5	4.1	6	EGFR|TP53|DICER1|ZC3H7A|SPOUT1|SRRT	RSI-MGI_down
GO Cellular Components	GO:0045178	basal part of cell	-2.5	4.1	6	EGFR|EPS15|FAP|SLC11A2|SLC23A1|CLASP1	RSI-MGI_down
GO Biological Processes	GO:0046034	ATP metabolic process	-2.5	2.1	18	AK1|BAD|CTNS|MYH3|NDUFB9|NDUFS4|NDUFS5|PFKFB3|PFKL|PRKAA1|TP53|VCP|AK5|GAPDHS|STOML2|PRKAG2|ATPSCKMT|MIR210	RSI-MGI_down
GO Biological Processes	GO:0051298	centrosome duplication	-2.5	3.6	7	ROCK2|USP33|SAC3D1|CHMP5|BRSK1|TMEM67|DEUP1	RSI-MGI_down
GO Biological Processes	GO:0006865	amino acid transport	-2.5	2.6	11	CTNS|NFKBIE|NTRK2|SLC3A1|SLC11A1|STXBP1|TRPV1|SLC7A5|LRRC8A|SLC16A10|SFXN4	RSI-MGI_down
GO Cellular Components	GO:0098589	membrane region	-2.5	2	19	ATP2B1|ATP2B4|BTK|DLG1|DMD|DPP4|EGFR|KCNMA1|LIPE|NOS3|TFPI|TLR1|SYNJ2|TLR6|DLC1|MLC1|STOML2|LAX1|TMEM190	RSI-MGI_down
GO Biological Processes	GO:0051235	maintenance of location	-2.5	2	19	DMD|FLNB|FFAR2|ITGAV|LPL|NFKBIE|TONSL|PLCB3|SLC8A1|TRPM2|TRPV1|DGAT1|SPOUT1|TMEM38B|FBXW7|ARHGAP21|TAF8|TTC39B|NRROS	RSI-MGI_down
GO Biological Processes	GO:0034614	cellular response to reactive oxygen species	-2.5	2.5	12	BTK|EGFR|ENDOG|HNRNPD|HSF1|NOS3|PRKAA1|TRPM2|PRDX3|KDM6B|PRDX5|AGAP3	RSI-MGI_down
GO Biological Processes	GO:0080135	regulation of cellular response to stress	-2.5	1.6	35	AGER|BAD|BAG1|CDK9|ATF6B|DLG1|EGFR|EIF4G1|ENDOG|EPO|HMGA1|HRAS|HSF1|HSP90AB1|PTPRF|TLR3|TP53|XRCC1|FZD1|ROCK2|TLR6|RSL1D1|FBXO5|ANKRD1|WRAP53|FBXW7|CCAR2|TRPV4|ARMT1|HDAC10|NUDT16L1|SYVN1|RNF169|GDF6|MIR210	RSI-MGI_down
GO Biological Processes	GO:0046031	ADP metabolic process	-2.5	2.8	10	AK1|BAD|PFKFB3|PFKL|PRKAA1|TP53|AK5|GAPDHS|PRKAG2|MIR210	RSI-MGI_down
GO Biological Processes	GO:0002755	MyD88-dependent toll-like receptor signaling pathway	-2.5	4.8	5	BTK|IRF7|TLR1|TLR6|TLR10	RSI-MGI_down
GO Biological Processes	GO:0006007	glucose catabolic process	-2.5	4.8	5	BAD|PFKL|TP53|GAPDHS|MIR210	RSI-MGI_down
GO Biological Processes	GO:0051052	regulation of DNA metabolic process	-2.5	1.9	23	CDK9|EGFR|ENDOG|HNRNPD|HRAS|HSF1|HSP90AB1|TP53|XRCC1|TNFSF13|STAG2|CCT5|GTPBP4|FBXO5|ANKRD1|STOML2|WRAP53|FBXW7|USP37|NIBAN2|HDAC10|NUDT16L1|RNF169	RSI-MGI_down
GO Cellular Components	GO:0005769	early endosome	-2.5	2	20	CD22|CTNS|EGFR|EPS15|SLC11A2|NTRK2|TLR3|PRDX3|MLC1|MGRN1|ECPAS|RNF11|VPS28|LAPTM4B|ZFYVE28|RBSN|KREMEN2|HAVCR2|FGD5|RASGEF1B	RSI-MGI_down
GO Biological Processes	GO:0034765	regulation of ion transmembrane transport	-2.5	1.8	25	ATP1B2|ATP2B4|CACNB1|CALCR|CAPN1|CLCN2|DLG1|DMD|EPO|KCNJ8|KCNMA1|SLC8A1|HOMER1|HECW1|KCNK4|TMEM38B|CATSPER1|LRRC38|ATPSCKMT|ANO6|ANO9|STAC2|MIR210|PIRT|SHISA7	RSI-MGI_down
GO Biological Processes	GO:0072593	reactive oxygen species metabolic process	-2.4	2.1	17	ATP2B4|CTNS|EGFR|GLA|HSP90AB1|NDUFS4|NOS3|TP53|TRPV1|ZNF205|STK17A|ROCK2|TLR6|PRDX3|PRDX5|NDUFAF2|NRROS	RSI-MGI_down
GO Biological Processes	GO:0120035	regulation of plasma membrane bounded cell projection organization	-2.4	1.6	33	BMP5|CFL1|EFNB3|MEGF8|EPO|HRAS|MAP1B|NTRK2|PFN2|PTPRF|SDC2|TRPM2|VIL1|VLDLR|FZD1|HOMER1|PLEKHM1|HECW1|ANKRD1|TNFRSF12A|CDHR5|TBC1D13|BIN3|SEMA6A|TRPV4|P3H1|CAPRIN2|AKIRIN1|TCHP|BRSK1|ZFYVE27|SDK1|MIR210	RSI-MGI_down
GO Biological Processes	GO:0071772	response to BMP	-2.4	2.5	12	XIAP|BMP5|BMPR1B|RUNX2|MEGF8|ENG|SMAD6|SFRP5|FZD1|CHRD|GDF6|SCX	RSI-MGI_down
GO Biological Processes	GO:0071773	cellular response to BMP stimulus	-2.4	2.5	12	XIAP|BMP5|BMPR1B|RUNX2|MEGF8|ENG|SMAD6|SFRP5|FZD1|CHRD|GDF6|SCX	RSI-MGI_down
GO Biological Processes	GO:0006816	calcium ion transport	-2.4	1.8	23	ATP2B1|ATP2B4|CACNB1|CALCR|DMD|EPO|GCG|ITGAV|NOS3|PLCB3|SLC8A1|TRPM2|TRPV1|HOMER1|CALCRL|SEC61A1|STOML2|TMEM38B|TRPV4|CATSPER1|TRPV3|ANO6|STAC2	RSI-MGI_down
GO Biological Processes	GO:0060537	muscle tissue development	-2.4	1.9	22	BMP5|CENPF|DLG1|ENG|FLNB|HLF|PRKAA1|MAPK11|SLC8A1|SORBS2|HOMER1|KDM6B|ANKRD2|ANKRD1|ASB2|BIN3|GPCPD1|MYORG|NIBAN2|AKIRIN1|PTCD2|SCX	RSI-MGI_down
GO Biological Processes	GO:0050766	positive regulation of phagocytosis	-2.4	3.5	7	C4A|GATA2|ITGAV|SLC11A1|TUB|TULP1|ANO6	RSI-MGI_down
GO Biological Processes	GO:0051084	'de novo' posttranslational protein folding	-2.4	4.7	5	BAG1|SELENOF|DNAJB5|TOR2A|DNAJC18	RSI-MGI_down
GO Biological Processes	GO:0031647	regulation of protein stability	-2.4	2.1	17	ATP1B2|HSP90AB1|PFN2|RNF5|STXBP1|TP53|CRTAP|RNF139|CCT5|USP33|GTPBP4|FBXW7|CCAR2|FKBPL|P3H1|ISOC2|SYVN1	RSI-MGI_down
GO Biological Processes	GO:0030004	cellular monovalent inorganic cation homeostasis	-2.4	2.9	9	ATP1B2|ATP4A|C7|KCNMA1|SLC4A2|SLC8A1|SLC11A1|RAB7A|SLC4A10	RSI-MGI_down
GO Biological Processes	GO:0006275	regulation of DNA replication	-2.4	2.9	9	EGFR|HRAS|TP53|STAG2|GTPBP4|FBXO5|STOML2|FBXW7|USP37	RSI-MGI_down
GO Biological Processes	GO:1901654	response to ketone	-2.4	2.3	13	ATP2B1|BAD|CDC5L|EGFR|EIF4E|EPO|GLB1|HNRNPD|HSF1|PRKAA1|FOSL1|ROCK2|CATSPER1	RSI-MGI_down
GO Biological Processes	GO:0032984	protein-containing complex disassembly	-2.4	2	19	MRPL49|CFL1|GSPT1|HMGA1|MAP1B|NSF|SMARCC1|VCP|VIL1|FZD1|SWAP70|MRPS27|CLASP1|TRMT112|CHMP5|MTRF1L|TRPV4|MRPS25|KIF24	RSI-MGI_down
GO Biological Processes	GO:0008277	regulation of G protein-coupled receptor signaling pathway	-2.4	2.6	11	ATP2B4|CALCR|GRK5|TUB|ROCK2|GIT2|USP33|METAP1|MGRN1|PHF24|CAMKMT	RSI-MGI_down
GO Biological Processes	GO:0010942	positive regulation of cell death	-2.4	1.6	34	BAD|BMPR1B|CALCR|EIF4G1|ENDOG|FAP|B4GALT1|HSF1|KCNMA1|PAK2|PLAUR|SOS2|TLR3|TP53|VCP|TRPV1|ZNF205|FOSL1|TNFSF12|STK17A|AKAP12|TRIM13|TLR6|DLC1|ANKRD1|TNFRSF12A|FBXW7|CCAR2|ZSWIM2|ANO6|PXT1|C3orf38|MIR210|MIR26B	RSI-MGI_down
GO Biological Processes	GO:0031331	positive regulation of cellular catabolic process	-2.4	1.9	20	BAD|ENDOG|HNRNPD|HSF1|PFKFB3|PRKAA1|VCP|ROCK2|TRIM13|RNF139|TNRC6B|HSPBP1|GAPDHS|FBXW7|LRSAM1|MTDH|SH3D19|YTHDF3|TMEM173|MIR210	RSI-MGI_down
GO Biological Processes	GO:0016045	detection of bacterium	-2.4	8.7	3	TLR1|TLR6|SSC5D	RSI-MGI_down
GO Biological Processes	GO:0002024	diet induced thermogenesis	-2.4	8.7	3	SCT|TRPV1|TRPV4	RSI-MGI_down
GO Biological Processes	GO:0072522	purine-containing compound biosynthetic process	-2.4	2	18	AK1|AMD1|NOS3|PFKFB3|PFKL|PRKAA1|TP53|VCP|PPT2|AK5|GAPDHS|STOML2|PRKAG2|PDP1|PRTFDC1|ADSS1|ATPSCKMT|SLC35B2	RSI-MGI_down
GO Biological Processes	GO:0006814	sodium ion transport	-2.4	2.2	14	ATP1B2|ATP2B4|ATP4A|DLG1|DMD|NOS3|SLC8A1|TRPM2|ASIC3|SLC23A1|HECW1|SLC4A10|ANO6|SLC13A5	RSI-MGI_down
GO Cellular Components	GO:0016323	basolateral plasma membrane	-2.4	2.2	14	ATP2B1|ATP2B4|DLG1|EGFR|SLC29A1|EPS15|B4GALT1|HSP90AB1|SLC4A2|SLC23A1|MLC1|SLC4A10|SLC16A10|CLDN19	RSI-MGI_down
GO Biological Processes	GO:0043624	cellular protein complex disassembly	-2.4	2.2	14	MRPL49|CFL1|GSPT1|MAP1B|NSF|VIL1|SWAP70|MRPS27|CLASP1|TRMT112|MTRF1L|TRPV4|MRPS25|KIF24	RSI-MGI_down
GO Biological Processes	GO:0045778	positive regulation of ossification	-2.4	3.1	8	ATP2B1|BMPR1B|RUNX2|IL6ST|SLC8A1|FBXO5|ANO6|MIR210	RSI-MGI_down
GO Cellular Components	GO:0044322	endoplasmic reticulum quality control compartment	-2.3	5.8	4	RNF5|TRIM13|RNF139|SYVN1	RSI-MGI_down
GO Cellular Components	GO:0099522	region of cytosol	-2.3	5.8	4	EIF4E|PLCB3|HOMER1|FBXO45	RSI-MGI_down
GO Biological Processes	GO:0001919	regulation of receptor recycling	-2.3	5.8	4	ACHE|EPS15|NSF|CHMP5	RSI-MGI_down
GO Cellular Components	GO:0005774	vacuolar membrane	-2.3	1.8	22	CD68|CTNS|DPP4|B4GALT1|HSP90AB1|SLC11A2|NSF|SLC3A1|TLR3|TRPM2|VLDLR|RAB7A|PLEKHM1|RNF13|MMD|CDIP1|SLC2A8|LAPTM4B|RRAGC|SBF2|ATG9B|TMEM173	RSI-MGI_down
GO Biological Processes	GO:0002274	myeloid leukocyte activation	-2.3	1.7	31	AGER|BTK|CAPN1|CD68|GATA2|B4GALT1|GLA|GLB1|HSP90AB1|ITGAV|PFKL|PLAUR|PSMD12|SLC11A1|STXBP1|TLR1|TLR3|TRPM2|VCP|TRPV1|RAB7A|DGAT1|CREG1|GGH|TLR6|MMP25|HAVCR2|BATF2|IL31RA|ANO6|TMEM173	RSI-MGI_down
GO Molecular Functions	GO:0004674	protein serine/threonine kinase activity	-2.3	1.8	23	BMPR1B|CCND3|CDK9|EGFR|GRK5|PAK2|CDK14|PRKAA1|MAPK11|MAPK12|MKNK1|PRPF4B|RPS6KA4|PKMYT1|STK17A|ROCK2|FASTK|STK38|PKN3|PRKAG2|BRSK1|ADCK5|SBK2	RSI-MGI_down
GO Biological Processes	GO:0031344	regulation of cell projection organization	-2.3	1.6	33	BMP5|CFL1|EFNB3|MEGF8|EPO|HRAS|MAP1B|NTRK2|PFN2|PTPRF|SDC2|TRPM2|VIL1|VLDLR|FZD1|HOMER1|PLEKHM1|HECW1|ANKRD1|TNFRSF12A|CDHR5|TBC1D13|BIN3|SEMA6A|TRPV4|P3H1|CAPRIN2|AKIRIN1|TCHP|BRSK1|ZFYVE27|SDK1|MIR210	RSI-MGI_down
GO Biological Processes	GO:0097194	execution phase of apoptosis	-2.3	3.1	8	ENDOG|FAP|GCG|HSF1|PAK2|TP53|DLC1|DICER1	RSI-MGI_down
GO Biological Processes	GO:0050729	positive regulation of inflammatory response	-2.3	2.5	11	BTK|EGFR|FFAR2|IL6ST|KLKB1|LPL|TLR3|TLR6|TRPV4|GPSM3|TLR10	RSI-MGI_down
GO Biological Processes	GO:0014706	striated muscle tissue development	-2.3	1.9	21	BMP5|CENPF|ENG|FLNB|HLF|PRKAA1|MAPK11|SLC8A1|SORBS2|HOMER1|KDM6B|ANKRD2|ANKRD1|ASB2|BIN3|GPCPD1|MYORG|NIBAN2|AKIRIN1|PTCD2|SCX	RSI-MGI_down
GO Cellular Components	GO:0045121	membrane raft	-2.3	2	18	ATP2B1|ATP2B4|BTK|DLG1|DMD|DPP4|EGFR|KCNMA1|LIPE|NOS3|TFPI|TLR1|SYNJ2|TLR6|DLC1|MLC1|STOML2|LAX1	RSI-MGI_down
GO Biological Processes	GO:0006402	mRNA catabolic process	-2.3	1.9	20	EIF4G1|GSPT1|HNRNPD|PSMD12|RNH1|RPL19|RPL28|RPL37|SLC11A1|TNFSF13|ROCK2|FXR2|PKP3|NCBP2|TNRC6B|DCP1A|SMG9|NUDT16L1|TENT2|YTHDF3	RSI-MGI_down
GO Biological Processes	GO:1904062	regulation of cation transmembrane transport	-2.3	1.9	19	ATP1B2|ATP2B4|CACNB1|CALCR|CAPN1|DLG1|DMD|EPO|SLC8A1|HOMER1|HECW1|TMEM38B|LRRC38|ATPSCKMT|ANO6|STAC2|MIR210|PIRT|SHISA7	RSI-MGI_down
GO Molecular Functions	GO:0004672	protein kinase activity	-2.3	1.7	29	BMPR1B|BTK|CCND3|CDK9|EFNB3|EGFR|EPHB4|GRK5|ITK|NTRK2|PAK2|CDK14|PRKAA1|MAPK11|MAPK12|MKNK1|PRPF4B|RPS6KA4|PKMYT1|STK17A|ROCK2|FASTK|STK38|MMD|PKN3|PRKAG2|BRSK1|ADCK5|SBK2	RSI-MGI_down
GO Cellular Components	GO:0098857	membrane microdomain	-2.3	2	18	ATP2B1|ATP2B4|BTK|DLG1|DMD|DPP4|EGFR|KCNMA1|LIPE|NOS3|TFPI|TLR1|SYNJ2|TLR6|DLC1|MLC1|STOML2|LAX1	RSI-MGI_down
GO Biological Processes	GO:0050881	musculoskeletal movement	-2.3	3.7	6	DMD|MYH3|XRCC1|HOMER1|RCSD1|STAC2	RSI-MGI_down
GO Biological Processes	GO:0050879	multicellular organismal movement	-2.3	3.7	6	DMD|MYH3|XRCC1|HOMER1|RCSD1|STAC2	RSI-MGI_down
GO Molecular Functions	GO:0043621	protein self-association	-2.3	3.7	6	ACHE|HSF1|TP53|ZFYVE27|TMEM190|ZSWIM2	RSI-MGI_down
GO Biological Processes	GO:0051197	positive regulation of coenzyme metabolic process	-2.3	5.6	4	PFKFB3|PRKAA1|GAPDHS|MIR210	RSI-MGI_down
GO Molecular Functions	GO:0043027	cysteine-type endopeptidase inhibitor activity involved in apoptotic process	-2.3	5.6	4	XIAP|VIL1|PRDX3|PRDX5	RSI-MGI_down
GO Biological Processes	GO:0030813	positive regulation of nucleotide catabolic process	-2.3	5.6	4	PFKFB3|PRKAA1|GAPDHS|MIR210	RSI-MGI_down
GO Biological Processes	GO:2000482	regulation of interleukin-8 secretion	-2.3	5.6	4	FFAR2|TLR1|TLR6|SSC5D	RSI-MGI_down
GO Cellular Components	GO:0098802	plasma membrane receptor complex	-2.3	2	17	BMPR1B|CALCR|CD247|DLG1|IL2RA|IL6ST|ITGAE|ITGAV|TRAV6|TLR1|CALCRL|TLR6|TRAV16|TRAV4|STOML2|APBB1IP|SHISA7	RSI-MGI_down
GO Biological Processes	GO:0008212	mineralocorticoid metabolic process	-2.3	8	3	BMP5|CLCN2|CYP21A2	RSI-MGI_down
GO Biological Processes	GO:0030007	cellular potassium ion homeostasis	-2.3	8	3	ATP1B2|ATP4A|KCNMA1	RSI-MGI_down
GO Biological Processes	GO:0034214	protein hexamerization	-2.3	8	3	VCP|LRRC8A|PANX2	RSI-MGI_down
GO Biological Processes	GO:0071415	cellular response to purine-containing compound	-2.3	8	3	SLC8A1|TRPM2|TMEM38B	RSI-MGI_down
GO Cellular Components	GO:0032591	dendritic spine membrane	-2.3	8	3	ATP2B1|TRPV1|SHISA7	RSI-MGI_down
GO Biological Processes	GO:0006705	mineralocorticoid biosynthetic process	-2.3	8	3	BMP5|CLCN2|CYP21A2	RSI-MGI_down
GO Cellular Components	GO:0016281	eukaryotic translation initiation factor 4F complex	-2.3	8	3	EIF4A1|EIF4E|EIF4G1	RSI-MGI_down
GO Biological Processes	GO:0051053	negative regulation of DNA metabolic process	-2.3	2.5	11	HSF1|TP53|XRCC1|STAG2|GTPBP4|FBXO5|ANKRD1|FBXW7|NIBAN2|NUDT16L1|RNF169	RSI-MGI_down
GO Biological Processes	GO:0008156	negative regulation of DNA replication	-2.3	4.4	5	TP53|STAG2|GTPBP4|FBXO5|FBXW7	RSI-MGI_down
GO Biological Processes	GO:0044409	entry into host	-2.2	2.6	10	DPP4|EFNB3|EGFR|EPS15|GPR15|ITGAV|KPNA3|CLDN6|CLDN9|SIVA1	RSI-MGI_down
GO Biological Processes	GO:0051828	entry into other organism involved in symbiotic interaction	-2.2	2.6	10	DPP4|EFNB3|EGFR|EPS15|GPR15|ITGAV|KPNA3|CLDN6|CLDN9|SIVA1	RSI-MGI_down
GO Biological Processes	GO:0030260	entry into host cell	-2.2	2.6	10	DPP4|EFNB3|EGFR|EPS15|GPR15|ITGAV|KPNA3|CLDN6|CLDN9|SIVA1	RSI-MGI_down
GO Biological Processes	GO:0051806	entry into cell of other organism involved in symbiotic interaction	-2.2	2.6	10	DPP4|EFNB3|EGFR|EPS15|GPR15|ITGAV|KPNA3|CLDN6|CLDN9|SIVA1	RSI-MGI_down
GO Biological Processes	GO:0051099	positive regulation of binding	-2.2	2.3	12	CDK9|EIF4G1|GCG|HSF1|HSP90AB1|PLAUR|USP33|LARP6|NIBAN2|CAPRIN2|CDCA5|TMEM173	RSI-MGI_down
GO Biological Processes	GO:2001235	positive regulation of apoptotic signaling pathway	-2.2	2.3	12	BAD|BMPR1B|PAK2|PLAUR|TP53|ZNF205|TNFSF12|TNFRSF12A|FBXW7|ZSWIM2|MIR210|MIR26B	RSI-MGI_down
GO Biological Processes	GO:1900076	regulation of cellular response to insulin stimulus	-2.2	3.3	7	ATP2B1|CCND3|ESRRA|LPL|PRKAA1|MZB1|ENHO	RSI-MGI_down
GO Molecular Functions	GO:0016301	kinase activity	-2.2	1.6	35	AK1|BMPR1B|BTK|CCND3|CDK9|DGKG|DLG1|EFNB3|EGFR|EPHB4|GRK5|ITK|NTRK2|PAK2|PFKFB3|PFKL|CDK14|PRKAA1|MAPK11|MAPK12|MKNK1|PRPF4B|RPS6KA4|PKMYT1|STK17A|ROCK2|FASTK|STK38|MMD|AK5|PKN3|PRKAG2|BRSK1|ADCK5|SBK2	RSI-MGI_down
GO Biological Processes	GO:0019320	hexose catabolic process	-2.2	3.7	6	BAD|GLB1|PFKL|TP53|GAPDHS|MIR210	RSI-MGI_down
GO Biological Processes	GO:1900544	positive regulation of purine nucleotide metabolic process	-2.2	3.7	6	NOS3|PFKFB3|PRKAA1|VCP|GAPDHS|MIR210	RSI-MGI_down
GO Biological Processes	GO:0045981	positive regulation of nucleotide metabolic process	-2.2	3.7	6	NOS3|PFKFB3|PRKAA1|VCP|GAPDHS|MIR210	RSI-MGI_down
GO Biological Processes	GO:0001649	osteoblast differentiation	-2.2	2.2	14	ACHE|BMPR1B|RUNX2|ESRRA|IL6ST|SMAD6|FZD1|CHRD|LRRC17|GTPBP4|WWTR1|RSL1D1|FBXO5|MIR210	RSI-MGI_down
GO Biological Processes	GO:0032103	positive regulation of response to external stimulus	-2.2	1.9	18	AGER|BTK|MEGF8|EGFR|FFAR2|IL6ST|KLKB1|LPL|TLR3|TLR6|SWAP70|TRPV4|GPSM3|AKIRIN1|TLR10|HAVCR2|LRSAM1|ANO6	RSI-MGI_down
GO Biological Processes	GO:0008361	regulation of cell size	-2.2	2.3	12	MEGF8|HSP90AB1|KCNMA1|MAP1B|SCT|TNFRSF12A|LRRC8A|SLC12A9|SEMA6A|TRPV4|ZFYVE27|ANO6	RSI-MGI_down
GO Biological Processes	GO:0015672	monovalent inorganic cation transport	-2.2	1.7	26	ATP1B2|ATP2B4|ATP4A|DLG1|DMD|KCNJ8|KCNMA1|NOS3|SLC11A2|NSF|SLC8A1|TRPM2|ASIC3|SLC23A1|ABCC9|HECW1|SLC2A8|STOML2|KCNK4|TMEM38B|SLC12A9|SLC4A10|LRRC38|ATPSCKMT|ANO6|SLC13A5	RSI-MGI_down
KEGG Pathway	hsa05205	Proteoglycans in cancer	-2.2	2.2	13	EGFR|FLNB|HRAS|ITGAV|PLAUR|MAPK11|MAPK12|SDC2|SOS2|TP53|FZD1|ROCK2|NUDT16L1	RSI-MGI_down
GO Biological Processes	GO:0042116	macrophage activation	-2.2	2.9	8	AGER|SLC11A1|TLR1|TLR3|TRPV1|TLR6|HAVCR2|IL31RA	RSI-MGI_down
GO Biological Processes	GO:0009132	nucleoside diphosphate metabolic process	-2.2	2.4	11	AK1|BAD|DLG1|PFKFB3|PFKL|PRKAA1|TP53|AK5|GAPDHS|PRKAG2|MIR210	RSI-MGI_down
Hallmark Gene Sets	M5941	HALLMARK UV RESPONSE UP	-2.2	2.4	11	AMD1|CCND3|CDC5L|CLCN2|HTR7|IL6ST|POLR2H|RPN1|DGAT1|CREG1|GGH	RSI-MGI_down
GO Biological Processes	GO:0006458	'de novo' protein folding	-2.2	4.3	5	BAG1|SELENOF|DNAJB5|TOR2A|DNAJC18	RSI-MGI_down
GO Biological Processes	GO:1903053	regulation of extracellular matrix organization	-2.2	4.3	5	AEBP1|DPP4|FAP|MELTF|CLASP1	RSI-MGI_down
GO Biological Processes	GO:0006734	NADH metabolic process	-2.2	4.3	5	PFKL|TP53|VCP|GAPDHS|MIR210	RSI-MGI_down
GO Biological Processes	GO:0061045	negative regulation of wound healing	-2.2	3.2	7	AGER|FAP|KLKB1|NOS3|PLAUR|TFPI|CLASP1	RSI-MGI_down
GO Biological Processes	GO:0032722	positive regulation of chemokine production	-2.2	3.6	6	AGER|FFAR2|LPL|TLR3|TRPV4|HAVCR2	RSI-MGI_down
GO Cellular Components	GO:0098794	postsynapse	-2.2	1.6	29	AGER|ATP2B1|DLG1|DMD|EFNB3|EIF4E|EPS15|HNRNPH2|KCNMA1|MAP1B|NSF|NTRK2|PAK2|PFN2|PLCB3|SLC8A1|STXBP1|TRPV1|HOMER1|FXR2|CLSTN3|ABI1|PLEKHA5|ZC4H2|KCTD16|PRRT1|TMUB1|FBXO45|SHISA7	RSI-MGI_down
GO Biological Processes	GO:0072521	purine-containing compound metabolic process	-2.2	1.6	29	AK1|AMD1|BAD|CTNS|DLG1|MYH3|NDUFB9|NDUFS4|NDUFS5|NOS3|PFKFB3|PFKL|PRKAA1|TP53|VCP|DGAT1|PPT2|NUDT3|AK5|GAPDHS|STOML2|PRKAG2|PDP1|PRTFDC1|ENOPH1|ADSS1|ATPSCKMT|SLC35B2|MIR210	RSI-MGI_down
GO Biological Processes	GO:0006260	DNA replication	-2.2	2	16	ACHE|CDK9|EGFR|HMGA1|HRAS|TONSL|POLD2|TP53|STAG2|GTPBP4|FBXO5|STOML2|FBXW7|USP37|RMI1|POLN	RSI-MGI_down
KEGG Pathway	hsa01522	Endocrine resistance	-2.2	2.9	8	BAD|EGFR|HRAS|NOTCH4|MAPK11|MAPK12|SOS2|TP53	RSI-MGI_down
GO Biological Processes	GO:0006979	response to oxidative stress	-2.2	1.8	23	NUDT2|BAD|BTK|EGFR|ENDOG|HNRNPD|HSF1|NOS3|PRKAA1|SLC8A1|TP53|TRPM2|XRCC1|FOSL1|FZD1|TLR6|PRDX3|KDM6B|PRDX5|ANKRD2|SLC25A24|FBXW7|AGAP3	RSI-MGI_down
GO Biological Processes	GO:0090066	regulation of anatomical structure size	-2.2	1.7	25	ATP2B1|CFL1|DLG1|MEGF8|EGFR|HSP90AB1|HTR7|KCNMA1|MAP1B|NOS3|PFN2|RAP1GDS1|SCT|SLC8A1|VIL1|ROCK2|SWAP70|TNFRSF12A|CDHR5|LRRC8A|SLC12A9|SEMA6A|TRPV4|ZFYVE27|ANO6	RSI-MGI_down
GO Biological Processes	GO:0045860	positive regulation of protein kinase activity	-2.2	1.7	26	AGER|ATP2B4|CCND3|DLG1|EGFR|EPO|GCG|GRM4|HRAS|HSP90AB1|NTRK2|PAK2|PRKAA1|MAPK11|SLC11A1|TLR3|VLDLR|ABI1|TLR6|MMD|PRKAG2|NCAPG2|FBXW7|AVPI1|MIR26B|SBK2	RSI-MGI_down
GO Cellular Components	GO:0005773	vacuole	-2.2	1.6	35	BTK|CAPN1|CD68|CTNS|CTSW|DPP4|B4GALT1|GLA|GLB1|HSP90AB1|SLC11A2|NSF|SDC2|SLC3A1|SLC11A1|TLR3|TRPM2|VCP|VLDLR|RAB7A|CREG1|GGH|PPT2|PLEKHM1|CALCRL|RNF13|MLC1|MMD|CDIP1|SLC2A8|LAPTM4B|RRAGC|SBF2|ATG9B|TMEM173	RSI-MGI_down
GO Biological Processes	GO:0006809	nitric oxide biosynthetic process	-2.2	3.2	7	ATP2B4|GLA|HSP90AB1|NOS3|TRPV1|ROCK2|TLR6	RSI-MGI_down
GO Biological Processes	GO:1900371	regulation of purine nucleotide biosynthetic process	-2.2	2.7	9	NOS3|PFKFB3|PRKAA1|TP53|VCP|GAPDHS|PRKAG2|PDP1|ATPSCKMT	RSI-MGI_down
GO Biological Processes	GO:0009168	purine ribonucleoside monophosphate biosynthetic process	-2.2	2.3	12	AK1|PFKFB3|PFKL|PRKAA1|TP53|VCP|AK5|GAPDHS|STOML2|PRKAG2|ADSS1|ATPSCKMT	RSI-MGI_down
GO Biological Processes	GO:0009127	purine nucleoside monophosphate biosynthetic process	-2.2	2.3	12	AK1|PFKFB3|PFKL|PRKAA1|TP53|VCP|AK5|GAPDHS|STOML2|PRKAG2|ADSS1|ATPSCKMT	RSI-MGI_down
GO Biological Processes	GO:0036376	sodium ion export across plasma membrane	-2.2	7.5	3	ATP1B2|ATP4A|SLC8A1	RSI-MGI_down
GO Biological Processes	GO:0098543	detection of other organism	-2.2	7.5	3	TLR1|TLR6|SSC5D	RSI-MGI_down
GO Molecular Functions	GO:0043028	cysteine-type endopeptidase regulator activity involved in apoptotic process	-2.2	4.1	5	XIAP|BAD|VIL1|PRDX3|PRDX5	RSI-MGI_down
GO Molecular Functions	GO:0004520	endodeoxyribonuclease activity	-2.2	4.1	5	ENDOG|XRCC1|DICER1|MUS81|TATDN1	RSI-MGI_down
GO Biological Processes	GO:0032231	regulation of actin filament bundle assembly	-2.2	2.9	8	PFN2|VIL1|ROCK2|SORBS3|DLC1|LIMCH1|SWAP70|CLASP1	RSI-MGI_down
GO Biological Processes	GO:0036475	neuron death in response to oxidative stress	-2.2	5.2	4	ENDOG|FZD1|TLR6|FBXW7	RSI-MGI_down
GO Biological Processes	GO:0009651	response to salt stress	-2.2	5.2	4	EPO|HSP90AB1|TP53|TRPV4	RSI-MGI_down
GO Biological Processes	GO:0030808	regulation of nucleotide biosynthetic process	-2.2	2.7	9	NOS3|PFKFB3|PRKAA1|TP53|VCP|GAPDHS|PRKAG2|PDP1|ATPSCKMT	RSI-MGI_down
GO Biological Processes	GO:1903530	regulation of secretion by cell	-2.2	1.6	34	ACHE|AGER|BAD|CD22|DPP4|EGFR|GATA2|GCG|FFAR2|IL11|LPL|NSF|PFKL|PFN2|MAPK11|SCT|STXBP1|TLR1|RAB7A|PREPL|AKAP12|TLR6|CLASP1|PNKD|ANKRD1|PANX2|TRPV4|P3H1|TLR10|HAVCR2|FBXL20|NDUFAF2|SSC5D|ENHO	RSI-MGI_down
KEGG Pathway	hsa04915	Estrogen signaling pathway	-2.1	2.8	8	ATF6B|EGFR|FKBP5|HRAS|HSP90AB1|NOS3|PLCB3|SOS2	RSI-MGI_down
GO Molecular Functions	GO:0019902	phosphatase binding	-2.1	2.3	12	ATP2B4|BAD|CD22|CDC5L|DLG1|EGFR|TP53|VCP|FBXL2|CSRNP2|SBF2|CADM4	RSI-MGI_down
GO Biological Processes	GO:0051193	regulation of cofactor metabolic process	-2.1	2.6	9	CTNS|PFKFB3|PRKAA1|TP53|ZNF205|GAPDHS|PRKAG2|PDP1|MIR210	RSI-MGI_down
GO Biological Processes	GO:1990573	potassium ion import across plasma membrane	-2.1	4.1	5	ATP1B2|ATP4A|KCNJ8|ABCC9|SLC12A9	RSI-MGI_down
GO Biological Processes	GO:0003009	skeletal muscle contraction	-2.1	4.1	5	DMD|MYH3|HOMER1|RCSD1|STAC2	RSI-MGI_down
GO Biological Processes	GO:0045746	negative regulation of Notch signaling pathway	-2.1	4.1	5	EGFR|GATA2|NOTCH4|FBXW7|NIBAN2	RSI-MGI_down
KEGG Pathway	hsa04022	cGMP-PKG signaling pathway	-2.1	2.4	11	ATP1B2|ATP2B1|ATP2B4|BAD|ATF6B|KCNJ8|KCNMA1|NOS3|PLCB3|SLC8A1|ROCK2	RSI-MGI_down
GO Biological Processes	GO:0071260	cellular response to mechanical stimulus	-2.1	3.1	7	BAD|EGFR|ENG|TLR3|ANKRD1|KCNK4|SCX	RSI-MGI_down
GO Molecular Functions	GO:0016773	phosphotransferase activity, alcohol group as acceptor	-2.1	1.6	32	BMPR1B|BTK|CCND3|CDK9|DGKG|EFNB3|EGFR|EPHB4|GRK5|ITK|NTRK2|PAK2|PFKFB3|PFKL|CDK14|PRKAA1|MAPK11|MAPK12|MKNK1|PRPF4B|RPS6KA4|PKMYT1|STK17A|ROCK2|FASTK|STK38|MMD|PKN3|PRKAG2|BRSK1|ADCK5|SBK2	RSI-MGI_down
GO Biological Processes	GO:0008285	negative regulation of cell proliferation	-2.1	1.6	34	BMP5|BMPR1B|BTK|DLG1|FAP|GATA2|B4GALT1|HMGA1|HRAS|HSF1|IL2RA|SMAD6|NOS3|MAPK11|PTPN14|RARRES1|SFRP5|TP53|VIPR2|FOSL1|MTSS1|ABI1|DLC1|MXD4|RNF139|DICER1|GTPBP4|TAX1BP3|MED31|FBXW7|P3H1|NIBAN2|AKIRIN1|HAVCR2	RSI-MGI_down
GO Biological Processes	GO:0051347	positive regulation of transferase activity	-2.1	1.6	30	AGER|ATP2B4|BAD|CCND3|DLG1|EGFR|EPO|GCG|GRM4|HNRNPD|HRAS|HSP90AB1|NTRK2|PAK2|PRKAA1|MAPK11|SLC11A1|TLR3|VLDLR|ABI1|TLR6|MMD|UBE2S|PRKAG2|NCAPG2|WRAP53|FBXW7|AVPI1|MIR26B|SBK2	RSI-MGI_down
KEGG Pathway	hsa04320	Dorso-ventral axis formation	-2.1	5	4	EGFR|NOTCH4|SOS2|ETV7	RSI-MGI_down
GO Molecular Functions	GO:0005227	calcium activated cation channel activity	-2.1	5	4	KCNMA1|TMEM63B|CATSPER1|ANO6	RSI-MGI_down
GO Biological Processes	GO:0006972	hyperosmotic response	-2.1	5	4	EPO|TLR3|TRPV4|RCSD1	RSI-MGI_down
GO Biological Processes	GO:0032233	positive regulation of actin filament bundle assembly	-2.1	3.4	6	PFN2|VIL1|ROCK2|SORBS3|LIMCH1|SWAP70	RSI-MGI_down
KEGG Pathway	hsa05418	Fluid shear stress and atherosclerosis	-2.1	2.5	10	BMPR1B|HSP90AB1|ITGAV|NOS3|PRKAA1|MAPK11|MAPK12|SDC2|TP53|TRPV4	RSI-MGI_down
GO Biological Processes	GO:1900542	regulation of purine nucleotide metabolic process	-2.1	2.5	10	NOS3|PFKFB3|PRKAA1|TP53|VCP|GAPDHS|PRKAG2|PDP1|ATPSCKMT|MIR210	RSI-MGI_down
GO Biological Processes	GO:0050804	modulation of chemical synaptic transmission	-2.1	1.8	22	ACHE|AGER|EFNB3|EGFR|EIF4E|GRM4|HRAS|MAP1B|NTRK2|PFN2|SCT|STXBP1|HOMER1|PREPL|AKAP12|CLSTN3|PHF24|PNKD|SLC4A10|BRSK1|FBXL20|SHISA7	RSI-MGI_down
GO Biological Processes	GO:0104004	cellular response to environmental stimulus	-2.1	1.9	18	BAD|EGFR|ENG|EPO|HRAS|HSF1|TLR3|TP53|TRPV1|METAP1|ANKRD1|KCNK4|TRPV4|CAMKMT|RCSD1|ADSS1|TENT2|SCX	RSI-MGI_down
GO Biological Processes	GO:0071214	cellular response to abiotic stimulus	-2.1	1.9	18	BAD|EGFR|ENG|EPO|HRAS|HSF1|TLR3|TP53|TRPV1|METAP1|ANKRD1|KCNK4|TRPV4|CAMKMT|RCSD1|ADSS1|TENT2|SCX	RSI-MGI_down
GO Biological Processes	GO:0009150	purine ribonucleotide metabolic process	-2.1	1.7	26	AK1|BAD|CTNS|DLG1|MYH3|NDUFB9|NDUFS4|NDUFS5|PFKFB3|PFKL|PRKAA1|TP53|VCP|DGAT1|PPT2|NUDT3|AK5|GAPDHS|STOML2|PRKAG2|PDP1|PRTFDC1|ADSS1|ATPSCKMT|SLC35B2|MIR210	RSI-MGI_down
GO Cellular Components	GO:0005815	microtubule organizing center	-2.1	1.6	33	CFAP410|CENPF|HSF1|RASSF7|RUVBL1|KIF3B|ROCK2|PATJ|CCDC85B|CCT5|USP33|CLASP1|ECPAS|AK5|SAC3D1|SPOUT1|WDR60|CAPRIN2|HAUS3|TMUB1|TCHP|BRSK1|CEP19|TUBGCP6|TMEM67|KNCN|DEUP1|HEPACAM2|TSGA10IP|POC1B|CFAP157|KIF24|CEP85L	RSI-MGI_down
GO Biological Processes	GO:0099177	regulation of trans-synaptic signaling	-2.1	1.8	22	ACHE|AGER|EFNB3|EGFR|EIF4E|GRM4|HRAS|MAP1B|NTRK2|PFN2|SCT|STXBP1|HOMER1|PREPL|AKAP12|CLSTN3|PHF24|PNKD|SLC4A10|BRSK1|FBXL20|SHISA7	RSI-MGI_down
GO Cellular Components	GO:0098797	plasma membrane protein complex	-2.1	1.6	31	ATP1B2|BMPR1B|C7|CACNB1|CALCR|CD247|DLG1|DMD|EGFR|EPS15|IL2RA|IL6ST|ITGAE|ITGAV|KCNJ8|KCNMA1|TRAV6|TLR1|SLC7A5|ABCC9|CALCRL|TLR6|ABCB8|TRAV16|TRAV4|STOML2|APBB1IP|GJA9|CATSPER1|LRRC38|SHISA7	RSI-MGI_down
GO Biological Processes	GO:0046184	aldehyde biosynthetic process	-2.1	7	3	BMP5|CLCN2|TKT	RSI-MGI_down
GO Biological Processes	GO:0017014	protein nitrosylation	-2.1	7	3	ADH5|ATP2B4|DMD	RSI-MGI_down
GO Biological Processes	GO:0045410	positive regulation of interleukin-6 biosynthetic process	-2.1	7	3	AGER|TLR1|TLR6	RSI-MGI_down
GO Biological Processes	GO:0018119	peptidyl-cysteine S-nitrosylation	-2.1	7	3	ADH5|ATP2B4|DMD	RSI-MGI_down
GO Biological Processes	GO:0045073	regulation of chemokine biosynthetic process	-2.1	7	3	AGER|TLR3|SIGIRR	RSI-MGI_down
GO Molecular Functions	GO:0016863	intramolecular oxidoreductase activity, transposing C=C bonds	-2.1	7	3	IDI1|ECI2|EBPL	RSI-MGI_down
GO Biological Processes	GO:0009611	response to wounding	-2.1	1.6	31	ACHE|AGER|DGKG|EGFR|EPO|FAP|GATA2|B4GALT1|HRAS|KLKB1|MAP1B|NOS3|NOTCH4|PLAUR|PTPRF|SLC11A1|STXBP1|TFPI|TM4SF4|VIL1|FIBP|METAP1|CLASP1|TNFRSF12A|BIN3|RBSN|AKIRIN1|MORN4|ANO6|CADM4|JMJD1C	RSI-MGI_down
GO Biological Processes	GO:0006936	muscle contraction	-2.1	1.8	19	ATP2B1|ATP2B4|DLG1|DMD|HTR7|KCNJ8|KCNMA1|MYH3|RAP1GDS1|SLC8A1|TRPV1|HOMER1|ROCK2|SORBS3|CALCRL|ANKRD2|TMEM38B|RCSD1|STAC2	RSI-MGI_down
GO Biological Processes	GO:0003012	muscle system process	-2.1	1.7	23	ATP2B1|ATP2B4|CDK9|DLG1|DMD|HTR7|IL6ST|KCNJ8|KCNMA1|MYH3|NOS3|RAP1GDS1|SLC8A1|TRPV1|SORBS2|HOMER1|ROCK2|SORBS3|CALCRL|ANKRD2|TMEM38B|RCSD1|STAC2	RSI-MGI_down
GO Biological Processes	GO:0009205	purine ribonucleoside triphosphate metabolic process	-2.1	1.9	18	AK1|BAD|CTNS|MYH3|NDUFB9|NDUFS4|NDUFS5|PFKFB3|PFKL|PRKAA1|TP53|VCP|AK5|GAPDHS|STOML2|PRKAG2|ATPSCKMT|MIR210	RSI-MGI_down
GO Biological Processes	GO:0071216	cellular response to biotic stimulus	-2.1	2.1	14	BTK|CD68|HSF1|NOS3|TFPI|TLR1|TP53|TLR6|ANKRD1|CHMP5|SIGIRR|MUS81|HAVCR2|MTDH	RSI-MGI_down
GO Biological Processes	GO:0009895	negative regulation of catabolic process	-2.1	1.9	17	ATP2B4|EGFR|EIF4E|EIF4G1|HNRNPD|HSP90AB1|PRKAA1|RNF5|SCO1|SLC11A1|SMARCC1|TP53|PKP3|BANP|LAPTM4B|CCAR2|TENT2	RSI-MGI_down
GO Biological Processes	GO:1903426	regulation of reactive oxygen species biosynthetic process	-2.1	2.8	8	ATP2B4|CTNS|GLA|HSP90AB1|TRPV1|ZNF205|ROCK2|TLR6	RSI-MGI_down
GO Biological Processes	GO:1903409	reactive oxygen species biosynthetic process	-2.1	2.6	9	ATP2B4|CTNS|GLA|HSP90AB1|NOS3|TRPV1|ZNF205|ROCK2|TLR6	RSI-MGI_down
GO Cellular Components	GO:0005901	caveola	-2.1	3	7	ATP2B4|KCNMA1|LIPE|NOS3|TFPI|DLC1|MLC1	RSI-MGI_down
GO Cellular Components	GO:0005764	lysosome	-2.1	1.6	31	BTK|CAPN1|CD68|CTNS|CTSW|DPP4|B4GALT1|GLA|GLB1|HSP90AB1|SLC11A2|NSF|SDC2|SLC11A1|TLR3|TRPM2|VCP|VLDLR|RAB7A|CREG1|GGH|PPT2|PLEKHM1|CALCRL|RNF13|MLC1|MMD|CDIP1|SLC2A8|LAPTM4B|RRAGC	RSI-MGI_down
GO Biological Processes	GO:0033674	positive regulation of kinase activity	-2	1.6	27	AGER|ATP2B4|BAD|CCND3|DLG1|EGFR|EPO|GCG|GRM4|HRAS|HSP90AB1|NTRK2|PAK2|PRKAA1|MAPK11|SLC11A1|TLR3|VLDLR|ABI1|TLR6|MMD|PRKAG2|NCAPG2|FBXW7|AVPI1|MIR26B|SBK2	RSI-MGI_down
GO Biological Processes	GO:0072606	interleukin-8 secretion	-2	4.8	4	FFAR2|TLR1|TLR6|SSC5D	RSI-MGI_down
GO Biological Processes	GO:0035666	TRIF-dependent toll-like receptor signaling pathway	-2	4.8	4	IRF7|TLR3|UBE2D2|TLR6	RSI-MGI_down
GO Biological Processes	GO:0055075	potassium ion homeostasis	-2	4.8	4	ATP1B2|ATP4A|KCNMA1|SLC12A9	RSI-MGI_down
GO Cellular Components	GO:0000323	lytic vacuole	-2	1.6	31	BTK|CAPN1|CD68|CTNS|CTSW|DPP4|B4GALT1|GLA|GLB1|HSP90AB1|SLC11A2|NSF|SDC2|SLC11A1|TLR3|TRPM2|VCP|VLDLR|RAB7A|CREG1|GGH|PPT2|PLEKHM1|CALCRL|RNF13|MLC1|MMD|CDIP1|SLC2A8|LAPTM4B|RRAGC	RSI-MGI_down
KEGG Pathway	hsa04142	Lysosome	-2	2.6	9	CD68|CTNS|CTSW|GLA|GLB1|SLC11A2|SLC11A1|PPT2|LAPTM4B	RSI-MGI_down
GO Biological Processes	GO:0006163	purine nucleotide metabolic process	-2	1.6	27	AK1|BAD|CTNS|DLG1|MYH3|NDUFB9|NDUFS4|NDUFS5|NOS3|PFKFB3|PFKL|PRKAA1|TP53|VCP|DGAT1|PPT2|NUDT3|AK5|GAPDHS|STOML2|PRKAG2|PDP1|PRTFDC1|ADSS1|ATPSCKMT|SLC35B2|MIR210	RSI-MGI_down
GO Biological Processes	GO:1901653	cellular response to peptide	-2	1.8	20	AGER|ATP2B1|CACNB1|CCND3|CDC5L|ESRRA|GCG|HSF1|LPL|MAP1B|PRKAA1|SMARCC1|TP53|ROCK2|TLR6|SLC2A8|MZB1|KLF3|CHMP5|ENHO	RSI-MGI_down
GO Biological Processes	GO:2001020	regulation of response to DNA damage stimulus	-2	2.1	13	CDK9|EGFR|HSF1|TP53|XRCC1|FBXO5|ANKRD1|WRAP53|CCAR2|ARMT1|HDAC10|NUDT16L1|RNF169	RSI-MGI_down
GO Biological Processes	GO:0032642	regulation of chemokine production	-2	3	7	AGER|FFAR2|LPL|TLR3|SIGIRR|TRPV4|HAVCR2	RSI-MGI_down
GO Biological Processes	GO:0046209	nitric oxide metabolic process	-2	3	7	ATP2B4|GLA|HSP90AB1|NOS3|TRPV1|ROCK2|TLR6	RSI-MGI_down
GO Biological Processes	GO:0051186	cofactor metabolic process	-2	1.6	28	AMD1|BLVRA|CPOX|CTNS|EGFR|FPGS|NOS3|SLC11A2|PFKFB3|PFKL|PRKAA1|TKT|TP53|VCP|ZNF205|DGAT1|GGH|PPT2|SLC23A1|PRDX3|ETHE1|PDSS1|PRDX5|GAPDHS|PRKAG2|PDP1|ENOPH1|MIR210	RSI-MGI_down
GO Molecular Functions	GO:0016887	ATPase activity	-2	1.8	20	ATP1B2|ATP2B1|ATP2B4|ATP4A|HSP90AB1|MYH3|NSF|PFN2|VCP|RUVBL1|KIF3B|ABCC9|ABCB8|DNAI1|TOR2A|ERCC6L|WDR60|KIF27|SHOC1|KIF24	RSI-MGI_down
GO Biological Processes	GO:0019693	ribose phosphate metabolic process	-2	1.6	27	AK1|BAD|CTNS|DLG1|MYH3|NDUFB9|NDUFS4|NDUFS5|PFKFB3|PFKL|PRKAA1|TKT|TP53|VCP|DGAT1|PPT2|NUDT3|AK5|GAPDHS|STOML2|PRKAG2|PDP1|PRTFDC1|ADSS1|ATPSCKMT|SLC35B2|MIR210	RSI-MGI_down
GO Biological Processes	GO:0007043	cell-cell junction assembly	-2	2.5	9	DLG1|UGT8|ROCK2|PATJ|PKP3|TRPV4|MTDH|CLDN19|GPBAR1	RSI-MGI_down
GO Biological Processes	GO:0006140	regulation of nucleotide metabolic process	-2	2.4	10	NOS3|PFKFB3|PRKAA1|TP53|VCP|GAPDHS|PRKAG2|PDP1|ATPSCKMT|MIR210	RSI-MGI_down
GO Biological Processes	GO:0070588	calcium ion transmembrane transport	-2	1.9	17	ATP2B4|CACNB1|CALCR|DMD|ITGAV|PLCB3|SLC8A1|TRPM2|TRPV1|SEC61A1|STOML2|TMEM38B|TRPV4|CATSPER1|TRPV3|ANO6|STAC2	RSI-MGI_down
GO Biological Processes	GO:0030810	positive regulation of nucleotide biosynthetic process	-2	3.8	5	NOS3|PFKFB3|PRKAA1|VCP|GAPDHS	RSI-MGI_down
GO Biological Processes	GO:0071675	regulation of mononuclear cell migration	-2	3.8	5	AGER|BMP5|TRPV4|AKIRIN1|ANO6	RSI-MGI_down
GO Biological Processes	GO:1900373	positive regulation of purine nucleotide biosynthetic process	-2	3.8	5	NOS3|PFKFB3|PRKAA1|VCP|GAPDHS	RSI-MGI_down
GO Biological Processes	GO:0042033	chemokine biosynthetic process	-2	6.5	3	AGER|TLR3|SIGIRR	RSI-MGI_down
GO Cellular Components	GO:0071437	invadopodium	-2	6.5	3	DPP4|FAP|PLAUR	RSI-MGI_down
GO Biological Processes	GO:0050755	chemokine metabolic process	-2	6.5	3	AGER|TLR3|SIGIRR	RSI-MGI_down
GO Biological Processes	GO:0043297	apical junction assembly	-2	3.3	6	DLG1|ROCK2|PATJ|MTDH|CLDN19|GPBAR1	RSI-MGI_down
GO Cellular Components	GO:0000139	Golgi membrane	-4.6	1.9	45	AP1G1|RND3|EXT1|F8|FUT1|FUT2|GLG1|GOLGA4|NOS3|NOTCH4|PKD1|PSEN2|ST3GAL2|STX5|SLC33A1|CHST3|CHST4|ABCA7|SLC35A1|ARFGEF1|FNDC3A|ERC1|SLC35A3|ABCA5|RAB26|MOB4|GORASP2|NSG1|TRAPPC3|DBNL|DSE|PLCE1|SCARA3|STX18|VPS53|RNF121|GALNT17|B3GNT4|CHPF|LMAN2L|LMTK3|TRAPPC6B|CNIH3|MANEAL|B4GALNT4	RSI-MGI_up
GO Biological Processes	GO:0009100	glycoprotein metabolic process	-4.6	2.3	30	AMFR|ENTPD5|NCAN|EXT1|EXTL3|FUT1|FUT2|HIF1A|PRKCSH|RNF5|ST3GAL2|DPM1|CHST3|SPOCK2|CHST4|ABCA7|ARFGEF1|GANAB|MAN2B2|AGO2|ALG5|DSE|EDEM2|GALNT17|B3GNT4|CHPF|DERL3|SLC51B|XXYLT1|TET3	RSI-MGI_up
GO Cellular Components	GO:0005759	mitochondrial matrix	-4.5	2.2	32	ALDH7A1|DGUOK|DLAT|HSPD1|HSPE1|ALDH6A1|PCCB|TFAM|MTHFD2|CLPX|FASTK|SIRT3|MRPS28|MRPL2|TRNT1|MRPS33|ADPRHL2|PDPR|NAXD|ACSS2|MCCC1|RARS2|MRPS35|MRPS14|AGXT2|MRPS24|MRPL38|CHPF|CARS2|ACSF2|MARS2|GSTK1	RSI-MGI_up
GO Biological Processes	GO:0061518	microglial cell proliferation	-4.5	18	4	CLU|CSF1|TREM2|IL34	RSI-MGI_up
GO Biological Processes	GO:0035966	response to topologically incorrect protein	-4.3	2.9	18	AMFR|CLU|ATF6B|EXTL3|HSPD1|HSPE1|RNF5|TLN1|BAG6|CUL7|COPS5|FGF21|DNAJB12|RNF121|EDEM2|DERL3|KLHDC3|BHLHA15	RSI-MGI_up
KEGG Pathway	hsa04150	mTOR signaling pathway	-4.1	3.2	15	BRAF|PIK3CB|CLIP1|SLC3A2|SOS1|SOS2|STK11|TNF|TSC2|FZD3|TELO2|DDIT4|MLST8|WNT5B|STRADA	RSI-MGI_up
GO Biological Processes	GO:0034976	response to endoplasmic reticulum stress	-4.1	2.5	22	AMFR|CLU|ATF6B|EXTL3|ITPR1|RNF5|TLN1|BAG6|CUL7|COPS5|UFL1|GORASP2|FGF21|UBXN1|DNAJB12|RNF121|EDEM2|TMUB1|TMEM259|DERL3|KLHDC3|BHLHA15	RSI-MGI_up
GO Molecular Functions	GO:0016597	amino acid binding	-4.1	4.9	9	AARS1|GAD1|GSS|NOS3|TAT|GNMT|SESN1|GRIN3B|CASTOR1	RSI-MGI_up
GO Biological Processes	GO:0061517	macrophage proliferation	-4	14	4	CLU|CSF1|TREM2|IL34	RSI-MGI_up
GO Biological Processes	GO:0006790	sulfur compound metabolic process	-4	2.3	26	NCAN|DLAT|ACSL3|GGT5|GPX4|GSS|PCCB|ST3GAL2|SMS|SULT2B1|PPT2|CHST3|SPOCK2|CHST4|AHCYL1|GNMT|DSE|PDPR|ADI1|ACSS2|MCCC1|B3GNT4|CHPF|ACSF2|FAR1|GSTK1	RSI-MGI_up
GO Cellular Components	GO:0000775	chromosome, centromeric region	-4	2.8	17	SEPTIN7|DYNC1I1|HELLS|NUP98|PSEN2|CLIP1|TPR|KAT2B|STAG1|DCTN6|PDS5B|TRAPPC12|CDCA8|ANAPC16|SPC24|SGO1|LRWD1	RSI-MGI_up
GO Cellular Components	GO:0000176	nuclear exosome (RNase complex)	-3.9	9.5	5	NVL|EXOSC9|EXOSC8|WDR74|EXOSC6	RSI-MGI_up
GO Cellular Components	GO:0019866	organelle inner membrane	-3.9	2	33	SLC25A6|CLU|DHODH|HSPD1|ITPR1|LMNB1|NDUFA8|PSEN2|SLC25A13|CLPX|ABCB8|P2RX2|DMAC2L|MRPS28|COQ6|MRPL2|ECSIT|MRPS33|SPHK2|COQ8A|MRPS35|MRPS14|MRPS24|MRPL38|L2HGDH|COQ10B|TMEM177|SLC25A2|NOA1|SLC25A26|SLC25A29|SLC25A47|UQCC3	RSI-MGI_up
GO Biological Processes	GO:0003012	muscle system process	-3.9	2.1	30	ACTG2|AIF1|ATP2B1|CLCN1|CRYAB|GNAO1|KCNH2|NOS3|PDE4B|PDE4D|PGAM2|MAP2K3|MAP2K6|PTK2|TLN1|TPM3|TRPC3|YY1|DDX39B|CACNA1G|ROCK2|TRDN|PDLIM5|P2RX2|OBSL1|KCNE4|PLCE1|GRIP2|MLIP|MIR499A	RSI-MGI_up
GO Biological Processes	GO:0006732	coenzyme metabolic process	-3.8	2.2	27	ATIC|ENTPD5|DLAT|ACSL3|GALK1|HIF1A|NUP98|PCCB|PGAM2|QDPR|TPR|VNN1|PPT2|AHCYL1|MTHFD2|GNMT|MOCS3|COQ6|DDIT4|PDPR|NAXD|ACSS2|MCCC1|COQ8A|COQ10B|ACSF2|FAR1	RSI-MGI_up
GO Biological Processes	GO:1901137	carbohydrate derivative biosynthetic process	-3.7	1.8	43	ATIC|ENTPD5|NCAN|DHODH|DLAT|EXT1|EXTL3|ACSL3|FUT1|FUT2|GALK1|HIF1A|NUP98|PGAM2|ST3GAL2|TPR|DPM1|GMPS|PPT2|CHST3|CHST4|SLC25A13|ABCA7|ARFGEF1|DMAC2L|AGO2|ALG5|DSE|TREM2|DDIT4|PDPR|ACSS2|SPHK2|GALNT17|MPPE1|B3GNT4|CHPF|CDADC1|DERL3|SLC51B|XXYLT1|TET3|UQCC3	RSI-MGI_up
KEGG Pathway	hsa04151	PI3K-Akt signaling pathway	-3.7	2.3	24	CHAD|COL4A2|ATF6B|CSF1|EPOR|FN1|IL2RA|ITGA4|ITGA9|ITGB4|NOS3|OSM|PIK3CB|PPP2R2C|PPP2R5D|PTK2|SOS1|SOS2|STK11|TSC2|PHLPP2|FGF21|DDIT4|MLST8	RSI-MGI_up
GO Biological Processes	GO:0072521	purine-containing compound metabolic process	-3.7	1.9	36	ATIC|ENTPD5|DGUOK|DLAT|ACSL3|GALK1|NIPSNAP2|HIF1A|MPP1|NDUFA8|NOS3|NUP98|PDE4B|PDE4D|PGAM2|SULT2B1|TPR|GMPS|PPT2|SLC25A13|AHCYL1|CLPX|DMAC2L|PDE7B|GNMT|MOCS3|TREM2|DDIT4|PDPR|ACSS2|SLC2A9|SPHK2|ACSF2|FAR1|OARD1|UQCC3	RSI-MGI_up
GO Molecular Functions	GO:0051020	GTPase binding	-3.7	2	33	AP1G1|BRAF|CHML|GDI2|GOLGA4|SOS1|SOS2|TSC2|ROCK2|RPH3AL|RUSC2|RABGAP1L|ARFGEF1|EXOC5|ERC1|MCF2L2|TBC1D12|ACAP2|TRAPPC3|PLCE1|RASIP1|ARHGAP17|PPP1R9A|SPHK2|DOCK6|RIC8A|TBC1D10A|ARHGEF39|STRIP1|MTSS2|FMNL2|UNC13D|TRAPPC3L	RSI-MGI_up
GO Molecular Functions	GO:0016874	ligase activity	-3.7	3.1	14	AARS1|ACSL3|GSS|PCCB|WARS1|GMPS|MOCS3|ACSS2|MCCC1|RARS2|CARS2|ACSF2|MARS2|TTLL11	RSI-MGI_up
GO Biological Processes	GO:0009124	nucleoside monophosphate biosynthetic process	-3.6	2.6	17	ATIC|ENTPD5|DGUOK|DHODH|GALK1|HIF1A|NUP98|PGAM2|TPR|GMPS|SLC25A13|DMAC2L|TREM2|DDIT4|SPHK2|CDADC1|UQCC3	RSI-MGI_up
GO Biological Processes	GO:1905907	negative regulation of amyloid fibril formation	-3.6	19	3	CLU|CRYAB|LDLR	RSI-MGI_up
GO Biological Processes	GO:0016073	snRNA metabolic process	-3.5	3.5	11	DKC1|EXOSC9|POLR2B|POLR2E|POLR2G|SNAPC1|EXOSC8|INTS6|PHAX|INTS5|EXOSC6	RSI-MGI_up
GO Cellular Components	GO:0000776	kinetochore	-3.5	3.1	13	SEPTIN7|DYNC1I1|NUP98|PSEN2|CLIP1|TPR|KAT2B|DCTN6|TRAPPC12|ANAPC16|SPC24|SGO1|LRWD1	RSI-MGI_up
GO Biological Processes	GO:0051186	cofactor metabolic process	-3.5	1.9	35	ATIC|ENTPD5|DLAT|ACSL3|GALK1|GGT5|GPX4|GSS|HIF1A|NOS3|NUP98|PCCB|PGAM2|QDPR|TAT|TPR|VNN1|PPT2|AHCYL1|MTHFD2|GNMT|MOCS3|COQ6|DDIT4|PDPR|RSAD1|NAXD|ACSS2|MCCC1|COQ8A|L2HGDH|COQ10B|ACSF2|FAR1|GSTK1	RSI-MGI_up
GO Molecular Functions	GO:0008514	organic anion transmembrane transporter activity	-3.5	2.6	17	SLC25A6|ATP8B1|SLC3A2|ABCC3|SLC16A6|SLC33A1|ASIC3|SLC25A13|SLC35A1|SLC35A3|SLC38A4|SLC2A9|SLC4A5|SLC25A2|SLC25A29|SLC51B|SLC13A5	RSI-MGI_up
GO Cellular Components	GO:0005743	mitochondrial inner membrane	-3.4	2	29	SLC25A6|CLU|DHODH|HSPD1|NDUFA8|SLC25A13|CLPX|ABCB8|DMAC2L|MRPS28|COQ6|MRPL2|ECSIT|MRPS33|SPHK2|COQ8A|MRPS35|MRPS14|MRPS24|MRPL38|L2HGDH|COQ10B|TMEM177|SLC25A2|NOA1|SLC25A26|SLC25A29|SLC25A47|UQCC3	RSI-MGI_up
GO Biological Processes	GO:0009165	nucleotide biosynthetic process	-3.3	2.1	25	ATIC|ENTPD5|DGUOK|DHODH|DLAT|ACSL3|GALK1|HIF1A|NOS3|NUP98|PGAM2|TPR|GMPS|PPT2|SLC25A13|AGPAT1|DMAC2L|TREM2|DDIT4|PDPR|NAXD|ACSS2|SPHK2|CDADC1|UQCC3	RSI-MGI_up
GO Biological Processes	GO:0034311	diol metabolic process	-3.3	7.3	5	QDPR|SPHK2|SGPP1|DEGS2|SGPP2	RSI-MGI_up
GO Biological Processes	GO:0035967	cellular response to topologically incorrect protein	-3.3	2.8	14	AMFR|ATF6B|EXTL3|RNF5|TLN1|BAG6|CUL7|COPS5|FGF21|DNAJB12|RNF121|DERL3|KLHDC3|BHLHA15	RSI-MGI_up
GO Biological Processes	GO:0007264	small GTPase mediated signal transduction	-3.3	1.9	33	AIF1|RND3|CHML|CSF1|EPOR|GDI2|INPP5B|SOS1|SOS2|TSC2|RFXANK|F2RL3|ROCK2|RAB3D|ARFGEF1|GNA13|MRAS|RASA3|RAB18|MCF2L2|ARHGAP45|RAB26|KANK2|DBNL|PLCE1|RASIP1|ARHGAP17|RAB20|DOCK6|ARHGEF39|RALGAPA1|P2RY8|CAVIN4	RSI-MGI_up
GO Biological Processes	GO:0006520	cellular amino acid metabolic process	-3.3	2.1	24	AARS1|ALDH7A1|GAD1|GGT5|GSS|ALDH6A1|NOS3|PSMD13|PSPH|QDPR|SMS|TAT|WARS1|GMPS|AHCYL1|GNMT|UPB1|ADI1|MCCC1|RARS2|AGXT2|CARS2|MARS2|IYD	RSI-MGI_up
GO Biological Processes	GO:0006753	nucleoside phosphate metabolic process	-3.3	1.8	39	ATIC|ENTPD5|DGUOK|DHODH|DLAT|ACSL3|GALK1|NIPSNAP2|HIF1A|MPP1|NDUFA8|NOS3|NTHL1|NUP98|PDE4B|PDE4D|PGAM2|SULT2B1|TPR|ASMTL|GMPS|PPT2|SLC25A13|AGPAT1|CLPX|SMPDL3A|DMAC2L|PDE7B|MOCS3|TREM2|DDIT4|PDPR|NAXD|ACSS2|SPHK2|ACSF2|CDADC1|FAR1|UQCC3	RSI-MGI_up
Hallmark Gene Sets	M5925	HALLMARK E2F TARGETS	-3.3	2.6	16	HELLS|LMNB1|PNN|POLE|RAD1|TCF19|STAG1|SYNCRIP|MTHFD2|NUDT21|EXOSC8|PDS5B|ING3|CDCA8|LYAR|SPC24	RSI-MGI_up
Hallmark Gene Sets	M5924	HALLMARK MTORC1 SIGNALING	-3.3	2.6	16	ACSL3|HSPD1|HSPE1|LDLR|MAP2K3|PSMD13|PSPH|QDPR|WARS1|BHLHE40|GMPS|MTHFD2|COPS5|CACYBP|DDIT4|ADIPOR2	RSI-MGI_up
GO Biological Processes	GO:1901293	nucleoside phosphate biosynthetic process	-3.3	2.1	25	ATIC|ENTPD5|DGUOK|DHODH|DLAT|ACSL3|GALK1|HIF1A|NOS3|NUP98|PGAM2|TPR|GMPS|PPT2|SLC25A13|AGPAT1|DMAC2L|TREM2|DDIT4|PDPR|NAXD|ACSS2|SPHK2|CDADC1|UQCC3	RSI-MGI_up
GO Biological Processes	GO:0009108	coenzyme biosynthetic process	-3.3	2.4	19	ATIC|ENTPD5|DLAT|ACSL3|GALK1|HIF1A|NUP98|PGAM2|QDPR|TPR|PPT2|MOCS3|COQ6|DDIT4|PDPR|NAXD|ACSS2|COQ8A|COQ10B	RSI-MGI_up
GO Biological Processes	GO:0051188	cofactor biosynthetic process	-3.2	2.2	22	ATIC|ENTPD5|DLAT|ACSL3|GALK1|GGT5|GSS|HIF1A|NUP98|PGAM2|QDPR|TPR|PPT2|MOCS3|COQ6|DDIT4|PDPR|RSAD1|NAXD|ACSS2|COQ8A|COQ10B	RSI-MGI_up
GO Biological Processes	GO:0015711	organic anion transport	-3.2	1.9	29	SLC25A6|ACE|ACSL3|LDLR|MIF|ATP8B1|MAP2K6|PSAP|SLC4A3|SLC3A2|SLC4A2|ABCC3|SLC16A6|SLC33A1|ASIC3|SLC25A13|ABCA7|SLC35A1|PRELID3A|SLC35A3|SLC38A4|SLC2A9|ATP8B2|SLC4A5|SLC25A2|SLC25A29|SLC51B|SLC37A2|SLC13A5	RSI-MGI_up
KEGG Pathway	hsa05205	Proteoglycans in cancer	-3.2	2.5	16	BRAF|ESR1|FLNB|FN1|HIF1A|ITPR1|PIK3CB|PTK2|SOS1|SOS2|TNF|FZD3|ROCK2|MRAS|PLCE1|WNT5B	RSI-MGI_up
GO Biological Processes	GO:0043628	ncRNA 3'-end processing	-3.2	4.7	7	DKC1|EXOSC9|EXOSC8|INTS6|TRNT1|INTS5|EXOSC6	RSI-MGI_up
GO Molecular Functions	GO:0008509	anion transmembrane transporter activity	-3.2	2.2	22	SLC25A6|CLCN1|CLCN7|ATP8B1|SLC4A3|SLC3A2|SLC4A2|ABCC3|SLC16A6|SLC33A1|ASIC3|SLC25A13|SLC35A1|SLC35A3|SLC38A4|SLC2A9|SLC4A5|SLC25A2|SLC25A29|SLC51B|SLC37A2|SLC13A5	RSI-MGI_up
GO Molecular Functions	GO:0031406	carboxylic acid binding	-3.2	2.5	16	AARS1|NCAN|GAD1|GSS|NOS3|PAM|PSAP|TAT|GNMT|SESN1|OGFOD1|MCCC1|P3H1|GRIN3B|HAPLN4|CASTOR1	RSI-MGI_up
GO Biological Processes	GO:0042982	amyloid precursor protein metabolic process	-3.2	4.1	8	AGER|CLU|PSEN2|TNF|ROCK2|ABCA7|NSG1|AGO2	RSI-MGI_up
GO Cellular Components	GO:1990234	transferase complex	-3.1	1.7	41	ACVR2A|AMFR|CHML|E2F6|PHKG1|PIK3CB|POLE|POLR2B|POLR2E|POLR2G|REST|TAF2|TAF7|UBE2D1|CDK13|DPM1|KAT2B|CDC16|CUL7|UBAP2L|DCAF7|TAF6L|WWP1|ERC1|TRPC4AP|CACYBP|MED31|CRBN|UBE2D4|ANKIB1|ING3|SUPT20H|WDR26|TRAF7|FBH1|DERL3|ANAPC16|AEBP2|NAA30|FBXL14|FBXO39	RSI-MGI_up
GO Molecular Functions	GO:0031267	small GTPase binding	-3.1	2	27	AP1G1|BRAF|CHML|GDI2|SOS1|SOS2|TSC2|ROCK2|RPH3AL|RUSC2|RABGAP1L|EXOC5|ERC1|MCF2L2|TBC1D12|ACAP2|TRAPPC3|PLCE1|ARHGAP17|SPHK2|TBC1D10A|ARHGEF39|STRIP1|MTSS2|FMNL2|UNC13D|TRAPPC3L	RSI-MGI_up
GO Biological Processes	GO:0072522	purine-containing compound biosynthetic process	-3.1	2.2	21	ATIC|ENTPD5|DGUOK|DLAT|ACSL3|GALK1|HIF1A|NOS3|NUP98|PGAM2|TPR|GMPS|PPT2|SLC25A13|DMAC2L|TREM2|DDIT4|PDPR|ACSS2|SPHK2|UQCC3	RSI-MGI_up
GO Cellular Components	GO:0042641	actomyosin	-3.1	3.6	9	SEPTIN7|CNN2|FLNB|PTK2|TPM3|CDC42BPA|KAT2B|WDR1|PDLIM5	RSI-MGI_up
GO Biological Processes	GO:0009117	nucleotide metabolic process	-3.1	1.7	38	ATIC|ENTPD5|DGUOK|DHODH|DLAT|ACSL3|GALK1|NIPSNAP2|HIF1A|MPP1|NDUFA8|NOS3|NTHL1|NUP98|PDE4B|PDE4D|PGAM2|SULT2B1|TPR|ASMTL|GMPS|PPT2|SLC25A13|AGPAT1|CLPX|DMAC2L|PDE7B|MOCS3|TREM2|DDIT4|PDPR|NAXD|ACSS2|SPHK2|ACSF2|CDADC1|FAR1|UQCC3	RSI-MGI_up
GO Biological Processes	GO:0014009	glial cell proliferation	-3.1	4.5	7	CLU|CSF1|LTA|TNF|UFL1|TREM2|IL34	RSI-MGI_up
GO Molecular Functions	GO:0004553	hydrolase activity, hydrolyzing O-glycosyl compounds	-3.1	3.3	10	AGL|GUSB|PSAP|GANAB|MAN2B2|CEMIP2|ADPRHL2|EDEM2|PGGHG|MANEAL	RSI-MGI_up
GO Biological Processes	GO:0009260	ribonucleotide biosynthetic process	-3.1	2.2	20	ATIC|ENTPD5|DHODH|DLAT|ACSL3|GALK1|HIF1A|NUP98|PGAM2|TPR|GMPS|PPT2|SLC25A13|DMAC2L|TREM2|DDIT4|PDPR|ACSS2|SPHK2|UQCC3	RSI-MGI_up
GO Cellular Components	GO:0000178	exosome (RNase complex)	-3.1	6.5	5	NVL|EXOSC9|EXOSC8|WDR74|EXOSC6	RSI-MGI_up
GO Biological Processes	GO:0044272	sulfur compound biosynthetic process	-3	2.5	15	NCAN|DLAT|ACSL3|GGT5|GSS|ST3GAL2|PPT2|CHST3|DSE|PDPR|ADI1|ACSS2|B3GNT4|CHPF|GSTK1	RSI-MGI_up
GO Biological Processes	GO:0031331	positive regulation of cellular catabolic process	-3	2.1	23	ENTPD5|CLU|HIF1A|LDLR|PIK3CB|POLR2G|PTK2|STK11|TNF|TSC2|BAG6|ROCK2|PUM1|FGF21|AGO2|SESN1|TREM2|ANKIB1|BBS7|EDEM2|TMEM259|MTDH|TRIM65	RSI-MGI_up
GO Biological Processes	GO:0036503	ERAD pathway	-3	3.2	10	AMFR|RNF5|BAG6|UBXN1|DNAJB12|RNF121|EDEM2|TMUB1|TMEM259|DERL3	RSI-MGI_up
GO Cellular Components	GO:1905354	exoribonuclease complex	-3	6.2	5	NVL|EXOSC9|EXOSC8|WDR74|EXOSC6	RSI-MGI_up
GO Molecular Functions	GO:0035925	mRNA 3'-UTR AU-rich region binding	-3	6.2	5	ELAVL3|EXOSC9|NUDT21|EXOSC8|RBMS3	RSI-MGI_up
KEGG Pathway	hsa04071	Sphingolipid signaling pathway	-3	3	11	NOS3|PIK3CB|PPP2R2C|PPP2R5D|TNF|ROCK2|GNA13|SPHK2|SGPP1|DEGS2|SGPP2	RSI-MGI_up
GO Biological Processes	GO:0006816	calcium ion transport	-3	1.9	26	ATP2B1|NIPSNAP2|GNAO1|ITPR1|NOS3|PDE4B|PDE4D|PKD1|PSEN2|SLC3A2|TRPC3|RGS9|CACNA1G|F2RL3|TRDN|RASA3|P2RX2|TRPC4AP|PLCE1|SARAF|SPHK2|CHRNA10|ORAI2|CACNA2D4|GRIN3B|BHLHA15	RSI-MGI_up
GO Biological Processes	GO:0006163	purine nucleotide metabolic process	-3	1.8	32	ATIC|ENTPD5|DGUOK|DLAT|ACSL3|GALK1|NIPSNAP2|HIF1A|MPP1|NDUFA8|NOS3|NUP98|PDE4B|PDE4D|PGAM2|SULT2B1|TPR|GMPS|PPT2|SLC25A13|CLPX|DMAC2L|PDE7B|MOCS3|TREM2|DDIT4|PDPR|ACSS2|SPHK2|ACSF2|FAR1|UQCC3	RSI-MGI_up
GO Biological Processes	GO:0006164	purine nucleotide biosynthetic process	-2.9	2.2	20	ATIC|ENTPD5|DLAT|ACSL3|GALK1|HIF1A|NOS3|NUP98|PGAM2|TPR|GMPS|PPT2|SLC25A13|DMAC2L|TREM2|DDIT4|PDPR|ACSS2|SPHK2|UQCC3	RSI-MGI_up
GO Biological Processes	GO:0046390	ribose phosphate biosynthetic process	-2.9	2.2	20	ATIC|ENTPD5|DHODH|DLAT|ACSL3|GALK1|HIF1A|NUP98|PGAM2|TPR|GMPS|PPT2|SLC25A13|DMAC2L|TREM2|DDIT4|PDPR|ACSS2|SPHK2|UQCC3	RSI-MGI_up
GO Biological Processes	GO:0006986	response to unfolded protein	-2.9	2.6	14	AMFR|ATF6B|EXTL3|HSPD1|HSPE1|TLN1|CUL7|COPS5|FGF21|RNF121|EDEM2|DERL3|KLHDC3|BHLHA15	RSI-MGI_up
GO Biological Processes	GO:0009152	purine ribonucleotide biosynthetic process	-2.9	2.2	19	ATIC|ENTPD5|DLAT|ACSL3|GALK1|HIF1A|NUP98|PGAM2|TPR|GMPS|PPT2|SLC25A13|DMAC2L|TREM2|DDIT4|PDPR|ACSS2|SPHK2|UQCC3	RSI-MGI_up
GO Biological Processes	GO:0046519	sphingoid metabolic process	-2.9	8.1	4	SPHK2|SGPP1|DEGS2|SGPP2	RSI-MGI_up
GO Molecular Functions	GO:0043177	organic acid binding	-2.9	2.4	16	AARS1|NCAN|GAD1|GSS|NOS3|PAM|PSAP|TAT|GNMT|SESN1|OGFOD1|MCCC1|P3H1|GRIN3B|HAPLN4|CASTOR1	RSI-MGI_up
GO Molecular Functions	GO:0016798	hydrolase activity, acting on glycosyl bonds	-2.9	3	11	AGL|GUSB|NTHL1|PSAP|GANAB|MAN2B2|CEMIP2|ADPRHL2|EDEM2|PGGHG|MANEAL	RSI-MGI_up
GO Biological Processes	GO:0009156	ribonucleoside monophosphate biosynthetic process	-2.9	2.5	15	ATIC|ENTPD5|DHODH|GALK1|HIF1A|NUP98|PGAM2|TPR|GMPS|SLC25A13|DMAC2L|TREM2|DDIT4|SPHK2|UQCC3	RSI-MGI_up
GO Biological Processes	GO:0009259	ribonucleotide metabolic process	-2.9	1.8	31	ATIC|ENTPD5|DHODH|DLAT|ACSL3|GALK1|NIPSNAP2|HIF1A|MPP1|NDUFA8|NUP98|PDE4B|PDE4D|PGAM2|SULT2B1|TPR|GMPS|PPT2|SLC25A13|CLPX|DMAC2L|PDE7B|MOCS3|TREM2|DDIT4|PDPR|ACSS2|SPHK2|ACSF2|FAR1|UQCC3	RSI-MGI_up
GO Cellular Components	GO:0000151	ubiquitin ligase complex	-2.9	2.2	19	AMFR|UBE2D1|CDC16|CUL7|DCAF7|WWP1|TRPC4AP|CACYBP|MED31|CRBN|UBE2D4|ANKIB1|WDR26|TRAF7|FBH1|DERL3|ANAPC16|FBXL14|FBXO39	RSI-MGI_up
GO Biological Processes	GO:0030968	endoplasmic reticulum unfolded protein response	-2.9	2.9	11	AMFR|ATF6B|EXTL3|TLN1|CUL7|COPS5|FGF21|RNF121|DERL3|KLHDC3|BHLHA15	RSI-MGI_up
GO Cellular Components	GO:0098687	chromosomal region	-2.9	2	22	SEPTIN7|DYNC1I1|H3-3B|HELLS|NUP98|ORC4|POLR2B|PSEN2|CLIP1|TPR|KAT2B|TELO2|STAG1|DCTN6|PDS5B|ORC3|TRAPPC12|CDCA8|ANAPC16|SPC24|SGO1|LRWD1	RSI-MGI_up
GO Molecular Functions	GO:0042578	phosphoric ester hydrolase activity	-2.8	2	23	DUSP6|EYA4|INPP5B|PDE4B|PDE4D|PPP2R2C|PPP2R5D|PSPH|PTPN4|CILP|PLPPR4|SMPDL3A|PHLPP2|PLCL2|PDE7B|PLCE1|PLPPR2|MPPE1|SGPP1|SGPP2|PGAM5|NT5DC1|PGP	RSI-MGI_up
GO Biological Processes	GO:0034475	U4 snRNA 3'-end processing	-2.8	12	3	EXOSC9|EXOSC8|EXOSC6	RSI-MGI_up
GO Biological Processes	GO:1905906	regulation of amyloid fibril formation	-2.8	12	3	CLU|CRYAB|LDLR	RSI-MGI_up
GO Biological Processes	GO:0010501	RNA secondary structure unwinding	-2.8	12	3	DDX39B|AGO1|AGO2	RSI-MGI_up
GO Biological Processes	GO:0009101	glycoprotein biosynthetic process	-2.8	2	22	ENTPD5|NCAN|EXT1|EXTL3|FUT1|FUT2|ST3GAL2|DPM1|CHST3|CHST4|ABCA7|ARFGEF1|AGO2|ALG5|DSE|GALNT17|B3GNT4|CHPF|DERL3|SLC51B|XXYLT1|TET3	RSI-MGI_up
GO Cellular Components	GO:0005763	mitochondrial small ribosomal subunit	-2.8	5.8	5	MRPS28|MRPS33|MRPS35|MRPS14|MRPS24	RSI-MGI_up
GO Cellular Components	GO:0070461	SAGA-type complex	-2.8	5.8	5	TAF2|TAF7|KAT2B|TAF6L|SUPT20H	RSI-MGI_up
GO Cellular Components	GO:0000314	organellar small ribosomal subunit	-2.8	5.8	5	MRPS28|MRPS33|MRPS35|MRPS14|MRPS24	RSI-MGI_up
GO Molecular Functions	GO:0017091	AU-rich element binding	-2.8	5.8	5	ELAVL3|EXOSC9|NUDT21|EXOSC8|RBMS3	RSI-MGI_up
GO Biological Processes	GO:0009116	nucleoside metabolic process	-2.8	2.9	11	ATIC|DGUOK|DHODH|MPP1|GMPS|AHCYL1|GNMT|MOCS3|UPB1|CDADC1|OARD1	RSI-MGI_up
GO Biological Processes	GO:0019751	polyol metabolic process	-2.8	2.9	11	GALK1|INPP5B|QDPR|PLCL2|PLCE1|SPHK2|SGPP1|DEGS2|SGPP2|IPMK|PGP	RSI-MGI_up
GO Biological Processes	GO:0009896	positive regulation of catabolic process	-2.8	1.9	25	ENTPD5|CLU|HIF1A|LDLR|PIK3CB|POLR2G|PTK2|STK11|STX5|TNF|TSC2|BAG6|ROCK2|PUM1|WWP1|FGF21|AGO2|SESN1|TREM2|ANKIB1|BBS7|EDEM2|TMEM259|MTDH|TRIM65	RSI-MGI_up
GO Biological Processes	GO:0009150	purine ribonucleotide metabolic process	-2.8	1.8	30	ATIC|ENTPD5|DLAT|ACSL3|GALK1|NIPSNAP2|HIF1A|MPP1|NDUFA8|NUP98|PDE4B|PDE4D|PGAM2|SULT2B1|TPR|GMPS|PPT2|SLC25A13|CLPX|DMAC2L|PDE7B|MOCS3|TREM2|DDIT4|PDPR|ACSS2|SPHK2|ACSF2|FAR1|UQCC3	RSI-MGI_up
GO Biological Processes	GO:0009168	purine ribonucleoside monophosphate biosynthetic process	-2.8	2.5	14	ATIC|ENTPD5|GALK1|HIF1A|NUP98|PGAM2|TPR|GMPS|SLC25A13|DMAC2L|TREM2|DDIT4|SPHK2|UQCC3	RSI-MGI_up
GO Biological Processes	GO:0009127	purine nucleoside monophosphate biosynthetic process	-2.8	2.5	14	ATIC|ENTPD5|GALK1|HIF1A|NUP98|PGAM2|TPR|GMPS|SLC25A13|DMAC2L|TREM2|DDIT4|SPHK2|UQCC3	RSI-MGI_up
GO Biological Processes	GO:1900221	regulation of amyloid-beta clearance	-2.7	7.2	4	CLU|TNF|ABCA7|TREM2	RSI-MGI_up
GO Biological Processes	GO:0010498	proteasomal protein catabolic process	-2.7	1.8	27	AMFR|CLU|PKD1|PSMD13|RNF5|UBE2D1|UBE2H|BAG6|CDC16|WWP1|UFL1|UBXN1|CRBN|TREM2|ANKIB1|DNAJB12|BBS7|RNF121|EDEM2|PBK|TMUB1|TMEM259|DERL3|AGAP3|ANAPC16|FBXL14|FBXO39	RSI-MGI_up
GO Molecular Functions	GO:0017016	Ras GTPase binding	-2.7	1.9	25	AP1G1|CHML|GDI2|SOS1|SOS2|ROCK2|RPH3AL|RUSC2|RABGAP1L|EXOC5|ERC1|MCF2L2|TBC1D12|ACAP2|TRAPPC3|PLCE1|ARHGAP17|SPHK2|TBC1D10A|ARHGEF39|STRIP1|MTSS2|FMNL2|UNC13D|TRAPPC3L	RSI-MGI_up
GO Biological Processes	GO:1904292	regulation of ERAD pathway	-2.7	5.4	5	BAG6|UBXN1|EDEM2|TMEM259|DERL3	RSI-MGI_up
GO Biological Processes	GO:0034472	snRNA 3'-end processing	-2.7	5.4	5	EXOSC9|EXOSC8|INTS6|INTS5|EXOSC6	RSI-MGI_up
GO Biological Processes	GO:1901657	glycosyl compound metabolic process	-2.7	2.6	12	ATIC|DGUOK|DHODH|GUSB|MPP1|GMPS|AHCYL1|GNMT|MOCS3|UPB1|CDADC1|OARD1	RSI-MGI_up
GO Cellular Components	GO:0000808	origin recognition complex	-2.7	11	3	ORC4|ORC3|LRWD1	RSI-MGI_up
GO Biological Processes	GO:0006198	cAMP catabolic process	-2.7	11	3	PDE4B|PDE4D|PDE7B	RSI-MGI_up
GO Biological Processes	GO:0010835	regulation of protein ADP-ribosylation	-2.7	11	3	WARS1|KAT2B|ADNP	RSI-MGI_up
GO Cellular Components	GO:0005664	nuclear origin of replication recognition complex	-2.7	11	3	ORC4|ORC3|LRWD1	RSI-MGI_up
GO Biological Processes	GO:0051056	regulation of small GTPase mediated signal transduction	-2.7	2	21	CSF1|EPOR|GDI2|INPP5B|SOS1|SOS2|TSC2|F2RL3|ARFGEF1|GNA13|RASA3|MCF2L2|ARHGAP45|KANK2|PLCE1|RASIP1|ARHGAP17|ARHGEF39|RALGAPA1|P2RY8|CAVIN4	RSI-MGI_up
GO Biological Processes	GO:0045639	positive regulation of myeloid cell differentiation	-2.7	3.2	9	ACVR2A|CSF1|HIF1A|LIF|TNF|ZNF16|HAX1|TREM2|IL34	RSI-MGI_up
GO Biological Processes	GO:1903708	positive regulation of hemopoiesis	-2.7	2.4	14	ACVR2A|AGER|CSF1|HIF1A|IL2RA|LIF|TNF|ZNF16|VNN1|HAX1|NUDT21|TREM2|IL34|ATXN1L	RSI-MGI_up
GO Biological Processes	GO:0042987	amyloid precursor protein catabolic process	-2.7	4.4	6	AGER|CLU|PSEN2|TNF|ROCK2|ABCA7	RSI-MGI_up
GO Molecular Functions	GO:0003779	actin binding	-2.6	1.9	25	AIF1|CNN2|FLNB|MYO10|NOS3|PTK2|TLN1|TPM3|WDR1|PDLIM5|SYNE2|OBSL1|DBNL|EVL|ALKBH4|MACO1|PPP1R9A|BAIAP2L1|MRTFA|MYH7B|PKNOX2|MED28|MTSS2|FMNL2|PPP1R42	RSI-MGI_up
GO Biological Processes	GO:0019693	ribose phosphate metabolic process	-2.6	1.7	31	ATIC|ENTPD5|DHODH|DLAT|ACSL3|GALK1|NIPSNAP2|HIF1A|MPP1|NDUFA8|NUP98|PDE4B|PDE4D|PGAM2|SULT2B1|TPR|GMPS|PPT2|SLC25A13|CLPX|DMAC2L|PDE7B|MOCS3|TREM2|DDIT4|PDPR|ACSS2|SPHK2|ACSF2|FAR1|UQCC3	RSI-MGI_up
GO Cellular Components	GO:0032432	actin filament bundle	-2.6	3.4	8	SEPTIN7|CNN2|CRYAB|FLNB|PTK2|TPM3|PDLIM5|RFLNB	RSI-MGI_up
GO Cellular Components	GO:0015629	actin cytoskeleton	-2.6	1.8	28	ACTG2|AIF1|CALB2|SEPTIN7|CNN2|CRYAB|FLNB|MYO10|PTK2|TPM3|CDC42BPA|KAT2B|WDR1|HAX1|PDLIM5|DCTN6|OBSL1|INTS6|DBNL|PPP1R9A|BAIAP2L1|MYH7B|PKNOX2|MED28|MTSS2|ANKRD23|SMTNL2|RFLNB	RSI-MGI_up
GO Biological Processes	GO:0070838	divalent metal ion transport	-2.6	1.8	27	ATP2B1|NIPSNAP2|GNAO1|ITPR1|NOS3|PDE4B|PDE4D|PKD1|PSEN2|SLC3A2|TRPC3|RGS9|CACNA1G|F2RL3|TRDN|RASA3|P2RX2|TRPC4AP|CNNM4|PLCE1|SARAF|SPHK2|CHRNA10|ORAI2|CACNA2D4|GRIN3B|BHLHA15	RSI-MGI_up
GO Biological Processes	GO:0006555	methionine metabolic process	-2.6	6.8	4	SMS|AHCYL1|GNMT|ADI1	RSI-MGI_up
GO Biological Processes	GO:0002544	chronic inflammatory response	-2.6	6.8	4	LTA|TNF|VNN1|UNC13D	RSI-MGI_up
KEGG Pathway	hsa00410	beta-Alanine metabolism	-2.6	5.2	5	ALDH7A1|GAD1|ALDH6A1|SMS|UPB1	RSI-MGI_up
GO Cellular Components	GO:0016324	apical plasma membrane	-2.6	2	20	AGER|ATP2B1|SEPTIN7|FN1|PDE4D|ATP8B1|PSEN2|PTK2|SLC3A2|SLC4A2|FZD3|SLC9A3R2|AHCYL1|P2RX2|KCNE4|PARD3|SLC2A9|SLC4A5|AQP10|MTDH	RSI-MGI_up
KEGG Pathway	hsa00270	Cysteine and methionine metabolism	-2.6	4.3	6	GSS|SMS|TAT|AHCYL1|ADI1|AGXT2	RSI-MGI_up
GO Molecular Functions	GO:0005096	GTPase activator activity	-2.6	2.1	18	CHML|GDI2|SOS1|TSC2|RGS9|RABGAP1L|ARFGEF1|RASA3|TBC1D12|ARHGAP45|ACAP2|ARHGAP17|RIC8A|TBC1D10A|MTSS2|AGAP3|PGAM5|RALGAPA1	RSI-MGI_up
GO Biological Processes	GO:0060964	regulation of gene silencing by miRNA	-2.6	2.9	10	ESR1|H3-3B|NUP98|POLR2B|POLR2E|POLR2G|TPR|PUM1|AGO1|AGO2	RSI-MGI_up
GO Biological Processes	GO:0042116	macrophage activation	-2.6	3.1	9	AGER|AIF1|CLU|HSPD1|LDLR|MIF|TNF|SBNO2|TREM2	RSI-MGI_up
GO Biological Processes	GO:0030433	ubiquitin-dependent ERAD pathway	-2.6	3.3	8	AMFR|RNF5|BAG6|DNAJB12|RNF121|EDEM2|TMUB1|DERL3	RSI-MGI_up
GO Molecular Functions	GO:0015301	anion:anion antiporter activity	-2.6	5.1	5	SLC25A6|SLC4A3|SLC4A2|SLC4A5|SLC37A2	RSI-MGI_up
GO Biological Processes	GO:0072511	divalent inorganic cation transport	-2.5	1.8	27	ATP2B1|NIPSNAP2|GNAO1|ITPR1|NOS3|PDE4B|PDE4D|PKD1|PSEN2|SLC3A2|TRPC3|RGS9|CACNA1G|F2RL3|TRDN|RASA3|P2RX2|TRPC4AP|CNNM4|PLCE1|SARAF|SPHK2|CHRNA10|ORAI2|CACNA2D4|GRIN3B|BHLHA15	RSI-MGI_up
GO Biological Processes	GO:0034660	ncRNA metabolic process	-2.5	1.7	30	AARS1|DKC1|NVL|EXOSC9|POLR2B|POLR2E|POLR2G|SMARCB1|SNAPC1|WARS1|EXOSC8|INTS6|AGO1|AGO2|MOCS3|TRNT1|PHAX|ANKRD16|WDR74|LYAR|RARS2|WDR18|CARS2|INTS5|RRP36|FDXACB1|MARS2|EXOSC6|TDRD9|RPL7L1	RSI-MGI_up
GO Biological Processes	GO:1902993	positive regulation of amyloid precursor protein catabolic process	-2.5	6.5	4	AGER|CLU|TNF|ROCK2	RSI-MGI_up
GO Cellular Components	GO:0005740	mitochondrial envelope	-2.5	1.6	37	SLC25A6|CLU|DHODH|ACSL3|NIPSNAP2|HSPD1|NDUFA8|RNF5|SLC25A13|HAX1|PRELID3A|CLPX|ABCB8|MLXIP|DMAC2L|MRPS28|COQ6|MRPL2|ECSIT|MRPS33|DIABLO|SPHK2|COQ8A|MRPS35|MRPS14|MRPS24|MRPL38|L2HGDH|COQ10B|TMEM177|SLC25A2|NOA1|SLC25A26|SLC25A29|PGAM5|SLC25A47|UQCC3	RSI-MGI_up
GO Biological Processes	GO:0032463	negative regulation of protein homooligomerization	-2.5	9.7	3	CLU|CRYAB|CRBN	RSI-MGI_up
GO Biological Processes	GO:0034427	nuclear-transcribed mRNA catabolic process, exonucleolytic, 3'-5'	-2.5	9.7	3	EXOSC9|EXOSC8|EXOSC6	RSI-MGI_up
GO Biological Processes	GO:0043632	modification-dependent macromolecule catabolic process	-2.5	1.7	33	AMFR|CLU|EXOSC9|PSMD13|PTK2|RNF5|UBE2D1|UBE2H|BAG6|CDC16|CUL7|WWP1|EXOSC8|UFL1|TRPC4AP|UBXN1|CRBN|UBE2D4|ANKIB1|ZRANB1|DNAJB12|BBS7|RNF121|EDEM2|PBK|TMUB1|DERL3|AGAP3|ANAPC16|FBXL14|FBXO39|USP12|UBAP1L	RSI-MGI_up
GO Biological Processes	GO:0043161	proteasome-mediated ubiquitin-dependent protein catabolic process	-2.5	1.8	24	AMFR|CLU|PSMD13|RNF5|UBE2D1|UBE2H|BAG6|CDC16|WWP1|UFL1|UBXN1|CRBN|ANKIB1|DNAJB12|BBS7|RNF121|EDEM2|PBK|TMUB1|DERL3|AGAP3|ANAPC16|FBXL14|FBXO39	RSI-MGI_up
GO Biological Processes	GO:0050435	amyloid-beta metabolic process	-2.5	4.1	6	CLU|ACE|PSEN2|TNF|ROCK2|ABCA7	RSI-MGI_up
GO Biological Processes	GO:0051962	positive regulation of nervous system development	-2.5	1.7	29	CSF1|FN1|GOLGA4|HIF1A|LIF|LTA|PTK7|REST|STK11|TNF|FZD3|IST1|CUL7|OBSL1|UFL1|ADNP|DBNL|TREM2|LRRN3|FAIM|PPP1R9A|PARD3|SEMA6A|P3H1|LLPH|IL34|AMIGO2|MIR431|LRTM2	RSI-MGI_up
GO Molecular Functions	GO:0017137	Rab GTPase binding	-2.5	2.4	13	AP1G1|CHML|GDI2|RPH3AL|RUSC2|RABGAP1L|ERC1|TBC1D12|ACAP2|TRAPPC3|TBC1D10A|UNC13D|TRAPPC3L	RSI-MGI_up
GO Biological Processes	GO:0060966	regulation of gene silencing by RNA	-2.5	2.8	10	ESR1|H3-3B|NUP98|POLR2B|POLR2E|POLR2G|TPR|PUM1|AGO1|AGO2	RSI-MGI_up
GO Biological Processes	GO:0060147	regulation of posttranscriptional gene silencing	-2.5	2.8	10	ESR1|H3-3B|NUP98|POLR2B|POLR2E|POLR2G|TPR|PUM1|AGO1|AGO2	RSI-MGI_up
GO Molecular Functions	GO:0030695	GTPase regulator activity	-2.5	2	19	CHML|GDI2|SOS1|TSC2|RGS9|RABGAP1L|ARFGEF1|RASA3|TBC1D12|ARHGAP45|ACAP2|ARHGAP17|RIC8A|GPSM3|TBC1D10A|MTSS2|AGAP3|PGAM5|RALGAPA1	RSI-MGI_up
GO Biological Processes	GO:0002269	leukocyte activation involved in inflammatory response	-2.5	4	6	AGER|AIF1|CLU|LDLR|TNF|TREM2	RSI-MGI_up
GO Biological Processes	GO:0001774	microglial cell activation	-2.5	4	6	AGER|AIF1|CLU|LDLR|TNF|TREM2	RSI-MGI_up
GO Biological Processes	GO:0030865	cortical cytoskeleton organization	-2.5	4	6	TLN1|TNF|ROCK2|WDR1|STRIP1|FMNL2	RSI-MGI_up
KEGG Pathway	hsa04330	Notch signaling pathway	-2.5	4	6	CTBP2|NOTCH4|PSEN2|KAT2B|DTX2|PTCRA	RSI-MGI_up
GO Cellular Components	GO:0042582	azurophil granule	-2.4	2.5	12	GDI2|GUSB|PSAP|VNN1|CPNE3|RAB3D|IST1|ARHGAP45|BRI3|STK11IP|UNC13D|TMEM179B	RSI-MGI_up
GO Cellular Components	GO:0005766	primary lysosome	-2.4	2.5	12	GDI2|GUSB|PSAP|VNN1|CPNE3|RAB3D|IST1|ARHGAP45|BRI3|STK11IP|UNC13D|TMEM179B	RSI-MGI_up
GO Biological Processes	GO:0007265	Ras protein signal transduction	-2.4	1.8	25	AIF1|RND3|CSF1|EPOR|SOS1|SOS2|RFXANK|F2RL3|ROCK2|RAB3D|ARFGEF1|GNA13|MRAS|RASA3|RAB18|MCF2L2|RAB26|KANK2|DBNL|PLCE1|RASIP1|RAB20|ARHGEF39|P2RY8|CAVIN4	RSI-MGI_up
GO Cellular Components	GO:0031966	mitochondrial membrane	-2.4	1.6	35	SLC25A6|CLU|DHODH|ACSL3|NIPSNAP2|HSPD1|NDUFA8|RNF5|SLC25A13|HAX1|CLPX|ABCB8|MLXIP|DMAC2L|MRPS28|COQ6|MRPL2|ECSIT|MRPS33|SPHK2|COQ8A|MRPS35|MRPS14|MRPS24|MRPL38|L2HGDH|COQ10B|TMEM177|SLC25A2|NOA1|SLC25A26|SLC25A29|PGAM5|SLC25A47|UQCC3	RSI-MGI_up
KEGG Pathway	hsa04510	Focal adhesion	-2.4	2.3	14	BRAF|CHAD|COL4A2|FLNB|FN1|ITGA4|ITGA9|ITGB4|PIK3CB|PTK2|SOS1|SOS2|TLN1|ROCK2	RSI-MGI_up
GO Biological Processes	GO:0090407	organophosphate biosynthetic process	-2.4	1.6	35	ATIC|ENTPD5|DGUOK|DHODH|DLAT|ACSL3|GALK1|HIF1A|NOS3|NUP98|PGAM2|PIK3CB|TPR|DPM1|GMPS|CPNE3|PPT2|SLC25A13|AGPAT1|PLCL2|DMAC2L|MOCS3|PLCE1|TREM2|DDIT4|PDPR|NAXD|ACSS2|SPHK2|MPPE1|CDADC1|PITPNM3|FAR1|IPMK|UQCC3	RSI-MGI_up
Hallmark Gene Sets	M5937	HALLMARK GLYCOLYSIS	-2.4	2.3	14	AGL|ALDH7A1|EXT1|GALK1|GUSB|MIF|PAM|PGAM2|CHST4|SLC25A13|HAX1|SLC35A3|DDIT4|CHPF	RSI-MGI_up
Hallmark Gene Sets	M5909	HALLMARK MYOGENESIS	-2.4	2.3	14	AGL|CLU|COL4A2|CRYAB|GNAO1|IGFBP7|ITGB4|KCNH2|PGAM2|PSEN2|TPM3|TSC2|BHLHE40|MRAS	RSI-MGI_up
GO Molecular Functions	GO:0015085	calcium ion transmembrane transporter activity	-2.4	2.6	11	ATP2B1|ITPR1|PKD1|SLC3A2|TRPC3|CACNA1G|RASA3|CHRNA10|ORAI2|CACNA2D4|GRIN3B	RSI-MGI_up
GO Cellular Components	GO:0031932	TORC2 complex	-2.4	8.8	3	TELO2|SESN1|MLST8	RSI-MGI_up
GO Biological Processes	GO:0000185	activation of MAPKKK activity	-2.4	8.8	3	TNF|MAP4K3|TRAF7	RSI-MGI_up
GO Biological Processes	GO:0098814	spontaneous synaptic transmission	-2.4	8.8	3	AGER|NSG1|PPP1R9A	RSI-MGI_up
GO Biological Processes	GO:0005975	carbohydrate metabolic process	-2.4	1.7	32	AGL|BRAF|ENTPD5|DLAT|EXT1|EXTL3|FUT1|FUT2|GALK1|GUSB|HIF1A|INPP5B|NUP98|PGAM2|PHKG1|ST3GAL2|SLC3A2|TNF|TPR|KAT2B|CHST3|CHST4|SLC25A13|SLC35A1|MLXIP|GANAB|MAN2B2|GNMT|DDIT4|B3GNT4|PGGHG|PGP	RSI-MGI_up
GO Biological Processes	GO:1901605	alpha-amino acid metabolic process	-2.4	2.2	15	ALDH7A1|GAD1|ALDH6A1|NOS3|PSPH|QDPR|SMS|TAT|GMPS|AHCYL1|GNMT|ADI1|MCCC1|AGXT2|IYD	RSI-MGI_up
GO Biological Processes	GO:0006754	ATP biosynthetic process	-2.4	2.4	12	ENTPD5|GALK1|HIF1A|NUP98|PGAM2|TPR|SLC25A13|DMAC2L|TREM2|DDIT4|SPHK2|UQCC3	RSI-MGI_up
GO Biological Processes	GO:0000291	nuclear-transcribed mRNA catabolic process, exonucleolytic	-2.4	4.6	5	EXOSC9|POLR2G|EXOSC8|EXOSC6|DCP1B	RSI-MGI_up
GO Biological Processes	GO:1902991	regulation of amyloid precursor protein catabolic process	-2.4	4.6	5	AGER|CLU|TNF|ROCK2|ABCA7	RSI-MGI_up
GO Biological Processes	GO:0034620	cellular response to unfolded protein	-2.4	2.5	11	AMFR|ATF6B|EXTL3|TLN1|CUL7|COPS5|FGF21|RNF121|DERL3|KLHDC3|BHLHA15	RSI-MGI_up
GO Biological Processes	GO:0045649	regulation of macrophage differentiation	-2.4	5.9	4	CSF1|INHA|LIF|IL34	RSI-MGI_up
GO Biological Processes	GO:0002931	response to ischemia	-2.4	3.9	6	CSF1|MAP2K6|REST|ROCK2|P2RX2|TREM2	RSI-MGI_up
GO Biological Processes	GO:0006936	muscle contraction	-2.4	1.9	21	ACTG2|ATP2B1|CLCN1|CRYAB|GNAO1|KCNH2|PDE4B|PDE4D|PGAM2|MAP2K3|MAP2K6|TLN1|TPM3|CACNA1G|ROCK2|TRDN|P2RX2|OBSL1|KCNE4|PLCE1|GRIP2	RSI-MGI_up
GO Biological Processes	GO:1905897	regulation of response to endoplasmic reticulum stress	-2.4	3.1	8	CLU|ATF6B|BAG6|COPS5|UBXN1|EDEM2|TMEM259|DERL3	RSI-MGI_up
GO Biological Processes	GO:0030029	actin filament-based process	-2.3	1.6	37	AIF1|RND3|CNN2|FLNB|KCNH2|PAM|PDE4B|PDE4D|PTK7|TESK1|TLN1|TNF|TPM3|CDC42BPA|CACNA1G|ROCK2|WDR1|HAX1|ARFGEF1|PDLIM5|MRAS|SYNE2|OBSL1|KCNE4|DBNL|EVL|ALKBH4|ARHGAP17|PPP1R9A|BAIAP2L1|MRTFA|EPB41L5|MLST8|STRIP1|FMNL2|SMTNL2|RFLNB	RSI-MGI_up
GO Biological Processes	GO:0006820	anion transport	-2.3	1.6	32	SLC25A6|CLCN1|CLCN7|ACE|ACSL3|LDLR|MIF|ATP8B1|MAP2K6|PSAP|SLC4A3|SLC3A2|SLC4A2|ABCC3|SLC16A6|SLC33A1|ASIC3|SLC25A13|ABCA7|SLC35A1|PRELID3A|AHCYL1|SLC35A3|SLC38A4|SLC2A9|ATP8B2|SLC4A5|SLC25A2|SLC25A29|SLC51B|SLC37A2|SLC13A5	RSI-MGI_up
GO Biological Processes	GO:0032007	negative regulation of TOR signaling	-2.3	3.8	6	HIF1A|STK11|TSC2|SESN1|DDIT4|CASTOR1	RSI-MGI_up
GO Biological Processes	GO:0016180	snRNA processing	-2.3	4.5	5	EXOSC9|EXOSC8|INTS6|INTS5|EXOSC6	RSI-MGI_up
GO Biological Processes	GO:0097242	amyloid-beta clearance	-2.3	4.5	5	CLU|LDLR|TNF|ABCA7|TREM2	RSI-MGI_up
GO Biological Processes	GO:0007030	Golgi organization	-2.3	2.5	11	ATP8B1|STX5|CUL7|ARFGEF1|OBSL1|GORASP2|TRAPPC12|STX18|ATP8B2|LMAN2L|BHLHA15	RSI-MGI_up
GO Molecular Functions	GO:0015297	antiporter activity	-2.3	3	8	SLC25A6|CLCN7|SLC4A3|SLC3A2|SLC4A2|SLC35A1|SLC4A5|SLC37A2	RSI-MGI_up
Hallmark Gene Sets	M5942	HALLMARK UV RESPONSE DN	-2.3	2.5	11	ACVR2A|RND3|ATP2B1|DBP|LDLR|MGMT|CDC42BPA|BHLHE40|CDK13|PDLIM5|DMAC2L	RSI-MGI_up
GO Molecular Functions	GO:0004115	3',5'-cyclic-AMP phosphodiesterase activity	-2.3	8.1	3	PDE4B|PDE4D|PDE7B	RSI-MGI_up
GO Cellular Components	GO:0030008	TRAPP complex	-2.3	8.1	3	TRAPPC3|TRAPPC12|TRAPPC3L	RSI-MGI_up
GO Biological Processes	GO:0031507	heterochromatin assembly	-2.3	8.1	3	H3-3B|HELLS|TPR	RSI-MGI_up
GO Biological Processes	GO:0032006	regulation of TOR signaling	-2.3	2.8	9	HIF1A|STK11|TSC2|TELO2|SESN1|TREM2|DDIT4|MLST8|CASTOR1	RSI-MGI_up
GO Biological Processes	GO:0006457	protein folding	-2.3	2.1	15	AMFR|ENTPD5|CLU|CRYAB|GNAO1|HSPD1|HSPE1|PRKCSH|RGS9|CLPX|GANAB|UBXN1|DNAJB12|P3H1|LMAN2L	RSI-MGI_up
GO Biological Processes	GO:0006471	protein ADP-ribosylation	-2.3	4.4	5	ART1|WARS1|KAT2B|ADNP|SIRT3	RSI-MGI_up
GO Biological Processes	GO:0006270	DNA replication initiation	-2.3	4.4	5	ORC4|POLE|ORC3|WDR18|LRWD1	RSI-MGI_up
GO Cellular Components	GO:0044297	cell body	-2.3	1.7	29	ACTG2|AIF1|AMFR|ATP2B1|CRYAB|DHODH|FABP7|FLNB|GNAO1|INHA|ITGA4|MYO10|PAM|PSEN2|SOS1|FZD3|LMTK2|P2RX2|ADNP|TMEM50A|CNNM4|CACYBP|UBXN1|PHAX|PPP1R9A|PARD3|CHRNA10|PITPNM3|GRIN3B	RSI-MGI_up
GO Biological Processes	GO:0019439	aromatic compound catabolic process	-2.3	1.6	35	ENTPD5|DKC1|GALK1|HIF1A|NTHL1|NUP98|PDE4B|PDE4D|PGAM2|EXOSC9|POLR2G|PSMD13|QDPR|RPL18|RPL21|RPS12|TAT|TPR|ROCK2|PUM1|SYNCRIP|RNPS1|SMPDL3A|EXOSC8|AGO1|PDE7B|AGO2|UPB1|DDIT4|UPF3A|CDADC1|FBH1|EXOSC6|DCP1B|TET3	RSI-MGI_up
GO Biological Processes	GO:0051603	proteolysis involved in cellular protein catabolic process	-2.2	1.6	35	AMFR|CLU|PKD1|PSMD13|PTK2|RNF5|UBE2D1|UBE2H|BAG6|CDC16|CUL7|CLPX|WWP1|UFL1|TRPC4AP|UBXN1|CRBN|UBE2D4|TREM2|ANKIB1|ZRANB1|DNAJB12|BBS7|RNF121|EDEM2|PBK|TMUB1|TMEM259|DERL3|AGAP3|ANAPC16|FBXL14|FBXO39|USP12|UBAP1L	RSI-MGI_up
GO Cellular Components	GO:0005793	endoplasmic reticulum-Golgi intermediate compartment	-2.2	2.6	10	F8|FN1|INPP5B|STX5|IST1|CNIH4|TRAPPC12|MPPE1|LMAN2L|CNIH3	RSI-MGI_up
GO Biological Processes	GO:0000904	cell morphogenesis involved in differentiation	-2.2	1.6	36	EXT1|FLNB|FN1|GBX1|GFRA1|GOLGA4|ITGA4|MATN2|NOTCH4|PIK3CB|PTK2|SOS1|STK11|COL14A1|FZD3|IST1|CUL7|PLPPR4|WDR1|PDLIM5|OBSL1|ADNP|DBNL|SCARA3|EVL|SEMA4C|PPP1R9A|PARD3|SEMA6A|EPB41L5|UNK|NTN5|CNTN4|UNC13D|EPHA10|LRTM2	RSI-MGI_up
GO Cellular Components	GO:0001750	photoreceptor outer segment	-2.2	2.9	8	INHA|PEX6|IFT140|PHLPP2|CNGB3|BBS7|LYAR|CERKL	RSI-MGI_up
GO Biological Processes	GO:0043502	regulation of muscle adaptation	-2.2	2.7	9	AIF1|NOS3|PTK2|TRPC3|YY1|DDX39B|ROCK2|MLIP|MIR499A	RSI-MGI_up
GO Biological Processes	GO:0044257	cellular protein catabolic process	-2.2	1.5	37	AMFR|CLU|LDLR|PKD1|PSMD13|PTK2|RNF5|UBE2D1|UBE2H|BAG6|CDC16|CUL7|CLPX|WWP1|UFL1|TRPC4AP|UBXN1|CRBN|UBE2D4|TREM2|ANKIB1|ZRANB1|DNAJB12|BBS7|RNF121|LAPTM4B|EDEM2|PBK|TMUB1|TMEM259|DERL3|AGAP3|ANAPC16|FBXL14|FBXO39|USP12|UBAP1L	RSI-MGI_up
GO Biological Processes	GO:0002763	positive regulation of myeloid leukocyte differentiation	-2.2	3.6	6	CSF1|LIF|TNF|HAX1|TREM2|IL34	RSI-MGI_up
KEGG Pathway	hsa00480	Glutathione metabolism	-2.2	3.6	6	GGT5|GPX4|GSS|SMS|LAP3|GSTK1	RSI-MGI_up
GO Biological Processes	GO:0042795	snRNA transcription by RNA polymerase II	-2.2	3.2	7	POLR2B|POLR2E|POLR2G|SNAPC1|INTS6|PHAX|INTS5	RSI-MGI_up
KEGG Pathway	hsa04668	TNF signaling pathway	-2.2	2.7	9	ATF6B|CSF1|LIF|LTA|PIK3CB|MAP2K3|MAP2K6|TNF|PGAM5	RSI-MGI_up
GO Cellular Components	GO:0044437	vacuolar part	-2.2	1.6	29	AP1G1|CLCN7|NCAN|CYB561|GDI2|GUSB|LDLR|PSAP|ABCC3|VNN1|CPNE3|PPT2|RAB3D|IST1|IFITM3|MAN2B2|ABCA5|ARHGAP45|BRI3|TECPR1|NSG1|LAPTM4B|AP5M1|SPHK2|SNX14|STK11IP|UNC13D|ATG9B|TMEM179B	RSI-MGI_up
KEGG Pathway	hsa04140	Autophagy - animal	-2.2	2.5	10	HIF1A|ITPR1|PIK3CB|STK11|TSC2|MRAS|DDIT4|SUPT20H|MLST8|ATG9B	RSI-MGI_up
GO Cellular Components	GO:0042405	nuclear inclusion body	-2.2	7.5	3	NUP98|TPR|NXF1	RSI-MGI_up
GO Molecular Functions	GO:0070679	inositol 1,4,5 trisphosphate binding	-2.2	7.5	3	ITPR1|TRPC3|PLCL2	RSI-MGI_up
GO Biological Processes	GO:0071027	nuclear RNA surveillance	-2.2	7.5	3	EXOSC9|EXOSC8|EXOSC6	RSI-MGI_up
GO Molecular Functions	GO:0005452	inorganic anion exchanger activity	-2.2	7.5	3	SLC4A3|SLC4A2|SLC4A5	RSI-MGI_up
GO Biological Processes	GO:0006670	sphingosine metabolic process	-2.2	7.5	3	SPHK2|SGPP1|SGPP2	RSI-MGI_up
GO Biological Processes	GO:0071028	nuclear mRNA surveillance	-2.2	7.5	3	EXOSC9|EXOSC8|EXOSC6	RSI-MGI_up
GO Biological Processes	GO:0030204	chondroitin sulfate metabolic process	-2.2	4.1	5	NCAN|CHST3|SPOCK2|DSE|CHPF	RSI-MGI_up
GO Biological Processes	GO:0006511	ubiquitin-dependent protein catabolic process	-2.2	1.6	31	AMFR|CLU|PSMD13|PTK2|RNF5|UBE2D1|UBE2H|BAG6|CDC16|CUL7|WWP1|UFL1|TRPC4AP|UBXN1|CRBN|UBE2D4|ANKIB1|ZRANB1|DNAJB12|BBS7|RNF121|EDEM2|PBK|TMUB1|DERL3|AGAP3|ANAPC16|FBXL14|FBXO39|USP12|UBAP1L	RSI-MGI_up
GO Molecular Functions	GO:0008047	enzyme activator activity	-2.2	1.7	27	CHML|FN1|GDI2|PPP2R5D|PSAP|SOS1|STK11|TSC2|RGS9|RABGAP1L|ARFGEF1|CLPX|RASA3|TBC1D12|ARHGAP45|ACAP2|DBNL|ARHGAP17|RIC8A|MLST8|TBC1D10A|MTSS2|STRADA|AGAP3|PGAM5|DCP1B|RALGAPA1	RSI-MGI_up
GO Biological Processes	GO:0009301	snRNA transcription	-2.2	3.1	7	POLR2B|POLR2E|POLR2G|SNAPC1|INTS6|PHAX|INTS5	RSI-MGI_up
GO Biological Processes	GO:0009123	nucleoside monophosphate metabolic process	-2.2	1.8	21	ATIC|ENTPD5|DGUOK|DHODH|GALK1|NIPSNAP2|HIF1A|MPP1|NDUFA8|NUP98|PGAM2|TPR|GMPS|SLC25A13|CLPX|DMAC2L|TREM2|DDIT4|SPHK2|CDADC1|UQCC3	RSI-MGI_up
GO Biological Processes	GO:0031123	RNA 3'-end processing	-2.2	2.4	11	DKC1|EXOSC9|DDX39B|AHCYL1|RNPS1|NUDT21|EXOSC8|INTS6|TRNT1|INTS5|EXOSC6	RSI-MGI_up
GO Biological Processes	GO:0009206	purine ribonucleoside triphosphate biosynthetic process	-2.2	2.3	12	ENTPD5|GALK1|HIF1A|NUP98|PGAM2|TPR|SLC25A13|DMAC2L|TREM2|DDIT4|SPHK2|UQCC3	RSI-MGI_up
GO Biological Processes	GO:0050769	positive regulation of neurogenesis	-2.1	1.7	25	CSF1|FN1|GOLGA4|HIF1A|LIF|LTA|PTK7|REST|STK11|TNF|FZD3|IST1|CUL7|OBSL1|UFL1|ADNP|DBNL|TREM2|FAIM|PPP1R9A|SEMA6A|P3H1|LLPH|IL34|MIR431	RSI-MGI_up
GO Biological Processes	GO:1901361	organic cyclic compound catabolic process	-2.1	1.5	36	ENTPD5|DKC1|GALK1|HIF1A|ALDH6A1|NTHL1|NUP98|PDE4B|PDE4D|PGAM2|EXOSC9|POLR2G|PSMD13|QDPR|RPL18|RPL21|RPS12|TAT|TPR|ROCK2|PUM1|SYNCRIP|RNPS1|SMPDL3A|EXOSC8|AGO1|PDE7B|AGO2|UPB1|DDIT4|UPF3A|CDADC1|FBH1|EXOSC6|DCP1B|TET3	RSI-MGI_up
KEGG Pathway	hsa03015	mRNA surveillance pathway	-2.1	2.8	8	PNN|PPP2R2C|PPP2R5D|DDX39B|NXF1|RNPS1|NUDT21|UPF3A	RSI-MGI_up
GO Biological Processes	GO:0034655	nucleobase-containing compound catabolic process	-2.1	1.6	32	ENTPD5|DKC1|GALK1|HIF1A|NTHL1|NUP98|PDE4B|PDE4D|PGAM2|EXOSC9|POLR2G|PSMD13|RPL18|RPL21|RPS12|TPR|ROCK2|PUM1|SYNCRIP|RNPS1|SMPDL3A|EXOSC8|AGO1|PDE7B|AGO2|UPB1|DDIT4|UPF3A|CDADC1|FBH1|EXOSC6|DCP1B	RSI-MGI_up
GO Biological Processes	GO:0009145	purine nucleoside triphosphate biosynthetic process	-2.1	2.3	12	ENTPD5|GALK1|HIF1A|NUP98|PGAM2|TPR|SLC25A13|DMAC2L|TREM2|DDIT4|SPHK2|UQCC3	RSI-MGI_up
GO Biological Processes	GO:0046700	heterocycle catabolic process	-2.1	1.6	34	ENTPD5|DKC1|GALK1|HIF1A|ALDH6A1|NTHL1|NUP98|PDE4B|PDE4D|PGAM2|EXOSC9|POLR2G|PSMD13|RPL18|RPL21|RPS12|TPR|ROCK2|PUM1|SYNCRIP|RNPS1|SMPDL3A|EXOSC8|AGO1|PDE7B|AGO2|UPB1|DDIT4|UPF3A|CDADC1|FBH1|EXOSC6|DCP1B|TET3	RSI-MGI_up
KEGG Pathway	hsa00260	Glycine, serine and threonine metabolism	-2.1	4	5	ALDH7A1|PGAM2|PSPH|GNMT|AGXT2	RSI-MGI_up
GO Biological Processes	GO:0043413	macromolecule glycosylation	-2.1	2	16	ENTPD5|EXT1|EXTL3|FUT1|FUT2|ST3GAL2|DPM1|CHST4|ARFGEF1|ALG5|GALNT17|B3GNT4|DERL3|SLC51B|XXYLT1|TET3	RSI-MGI_up
GO Biological Processes	GO:0006486	protein glycosylation	-2.1	2	16	ENTPD5|EXT1|EXTL3|FUT1|FUT2|ST3GAL2|DPM1|CHST4|ARFGEF1|ALG5|GALNT17|B3GNT4|DERL3|SLC51B|XXYLT1|TET3	RSI-MGI_up
GO Cellular Components	GO:0034399	nuclear periphery	-2.1	2.5	10	LMNB1|NUP98|TPR|YY1|DDX39B|TELO2|DCAF7|STAG1|ARFGEF1|PRPF40A	RSI-MGI_up
GO Biological Processes	GO:0044270	cellular nitrogen compound catabolic process	-2.1	1.6	34	ENTPD5|DKC1|GALK1|HIF1A|ALDH6A1|NTHL1|NUP98|PDE4B|PDE4D|PGAM2|EXOSC9|POLR2G|PSMD13|RPL18|RPL21|RPS12|TPR|ROCK2|PUM1|SYNCRIP|RNPS1|SMPDL3A|EXOSC8|AGO1|PDE7B|AGO2|UPB1|DDIT4|UPF3A|CDADC1|FBH1|EXOSC6|DCP1B|TET3	RSI-MGI_up
GO Biological Processes	GO:0000398	mRNA splicing, via spliceosome	-2.1	1.8	21	MBNL1|NUP98|PNN|POLR2B|POLR2E|POLR2G|REST|RNU2-1|DDX39B|GEMIN2|CDK13|PDCD7|SF3A1|SYNCRIP|RNPS1|NUDT21|SF3B1|SYF2|RNU1-1|PRPF40A|SUGP1	RSI-MGI_up
GO Biological Processes	GO:0000377	RNA splicing, via transesterification reactions with bulged adenosine as nucleophile	-2.1	1.8	21	MBNL1|NUP98|PNN|POLR2B|POLR2E|POLR2G|REST|RNU2-1|DDX39B|GEMIN2|CDK13|PDCD7|SF3A1|SYNCRIP|RNPS1|NUDT21|SF3B1|SYF2|RNU1-1|PRPF40A|SUGP1	RSI-MGI_up
GO Biological Processes	GO:0019941	modification-dependent protein catabolic process	-2.1	1.6	31	AMFR|CLU|PSMD13|PTK2|RNF5|UBE2D1|UBE2H|BAG6|CDC16|CUL7|WWP1|UFL1|TRPC4AP|UBXN1|CRBN|UBE2D4|ANKIB1|ZRANB1|DNAJB12|BBS7|RNF121|EDEM2|PBK|TMUB1|DERL3|AGAP3|ANAPC16|FBXL14|FBXO39|USP12|UBAP1L	RSI-MGI_up
GO Molecular Functions	GO:0016788	hydrolase activity, acting on ester bonds	-2.1	1.5	36	AARS1|DUSP6|EYA4|INPP5B|NTHL1|PDE4B|PDE4D|EXOSC9|POLE|PPP2R2C|PPP2R5D|PSPH|PTPN4|RAD1|CILP|PPT2|PLPPR4|SMPDL3A|EXOSC8|PHLPP2|PLCL2|AGO1|PDE7B|AGO2|ABHD17B|PLCE1|PLPPR2|MPPE1|PLBD1|SGPP1|PITPNM3|EXOSC6|SGPP2|PGAM5|NT5DC1|PGP	RSI-MGI_up
GO Cellular Components	GO:0005938	cell cortex	-2.1	1.9	18	RND3|CALB2|SEPTIN7|CTBP2|FLNB|GAD1|MPP1|MYO10|PTK2|WDR1|HAX1|EXOC5|RAI14|DBNL|PPP1R9A|PARD3|MED28|MTSS2	RSI-MGI_up
GO Biological Processes	GO:0014015	positive regulation of gliogenesis	-2.1	3.1	7	CSF1|LIF|LTA|TNF|UFL1|TREM2|IL34	RSI-MGI_up
GO Biological Processes	GO:0030206	chondroitin sulfate biosynthetic process	-2.1	5	4	NCAN|CHST3|DSE|CHPF	RSI-MGI_up
GO Biological Processes	GO:0051788	response to misfolded protein	-2.1	5	4	CLU|RNF5|BAG6|DNAJB12	RSI-MGI_up
GO Biological Processes	GO:1903510	mucopolysaccharide metabolic process	-2.1	2.6	9	NCAN|GUSB|ST3GAL2|CHST3|SPOCK2|CEMIP2|DSE|B3GNT4|CHPF	RSI-MGI_up
GO Biological Processes	GO:0006888	ER to Golgi vesicle-mediated transport	-2.1	2.1	14	DYNC1I1|F8|STX5|DCTN6|TRAPPC3|CNIH4|TRAPPC12|STX18|MPPE1|LMAN2L|PITPNM3|TRAPPC6B|CNIH3|TRAPPC3L	RSI-MGI_up
GO Biological Processes	GO:0009214	cyclic nucleotide catabolic process	-2.1	6.9	3	PDE4B|PDE4D|PDE7B	RSI-MGI_up
GO Molecular Functions	GO:0015926	glucosidase activity	-2.1	6.9	3	AGL|GANAB|PGGHG	RSI-MGI_up
GO Cellular Components	GO:0000177	cytoplasmic exosome (RNase complex)	-2.1	6.9	3	EXOSC9|EXOSC8|EXOSC6	RSI-MGI_up
GO Biological Processes	GO:0045651	positive regulation of macrophage differentiation	-2.1	6.9	3	CSF1|LIF|IL34	RSI-MGI_up
GO Cellular Components	GO:0038201	TOR complex	-2.1	6.9	3	TELO2|SESN1|MLST8	RSI-MGI_up
GO Cellular Components	GO:0031314	extrinsic component of mitochondrial inner membrane	-2.1	6.9	3	COQ6|COQ8A|NOA1	RSI-MGI_up
GO Molecular Functions	GO:0016875	ligase activity, forming carbon-oxygen bonds	-2.1	3.9	5	AARS1|WARS1|RARS2|CARS2|MARS2	RSI-MGI_up
GO Molecular Functions	GO:0004812	aminoacyl-tRNA ligase activity	-2.1	3.9	5	AARS1|WARS1|RARS2|CARS2|MARS2	RSI-MGI_up
GO Biological Processes	GO:0000375	RNA splicing, via transesterification reactions	-2.1	1.8	21	MBNL1|NUP98|PNN|POLR2B|POLR2E|POLR2G|REST|RNU2-1|DDX39B|GEMIN2|CDK13|PDCD7|SF3A1|SYNCRIP|RNPS1|NUDT21|SF3B1|SYF2|RNU1-1|PRPF40A|SUGP1	RSI-MGI_up
GO Molecular Functions	GO:0048029	monosaccharide binding	-2.1	3	7	GALK1|PAM|SCARA3|OGFOD1|P3H1|COLEC11|LMAN2L	RSI-MGI_up
GO Biological Processes	GO:0031663	lipopolysaccharide-mediated signaling pathway	-2.1	3.3	6	MIF|NFKBIL1|NOS3|TNF|SASH1|MTDH	RSI-MGI_up
GO Biological Processes	GO:0061900	glial cell activation	-2.1	3.3	6	AGER|AIF1|CLU|LDLR|TNF|TREM2	RSI-MGI_up
GO Biological Processes	GO:0043043	peptide biosynthetic process	-2.1	1.5	35	AARS1|GGT5|GSS|NOTCH4|POLR2G|RPL18|RPL21|RPS12|TNF|TPR|WARS1|DDX39B|ROCK2|PUM1|SYNCRIP|COPS5|AGO1|AGO2|RBMS3|MRPS28|MRPL2|RWDD1|MRPS33|OGFOD1|RARS2|MRPS35|MRPS14|MRPS24|MRPL38|UPF3A|CARS2|NOA1|UNK|MARS2|MIR499A	RSI-MGI_up
GO Biological Processes	GO:0048143	astrocyte activation	-2	4.8	4	AGER|LDLR|TNF|TREM2	RSI-MGI_up
GO Biological Processes	GO:0042278	purine nucleoside metabolic process	-2	3	7	DGUOK|MPP1|GMPS|AHCYL1|GNMT|MOCS3|OARD1	RSI-MGI_up
GO Molecular Functions	GO:0003725	double-stranded RNA binding	-2	3	7	HSPD1|MBNL1|SLC3A2|AGO1|AGO2|YRDC|MTDH	RSI-MGI_up
GO Biological Processes	GO:0006412	translation	-2	1.5	34	AARS1|GGT5|NOTCH4|POLR2G|RPL18|RPL21|RPS12|TNF|TPR|WARS1|DDX39B|ROCK2|PUM1|SYNCRIP|COPS5|AGO1|AGO2|RBMS3|MRPS28|MRPL2|RWDD1|MRPS33|OGFOD1|RARS2|MRPS35|MRPS14|MRPS24|MRPL38|UPF3A|CARS2|NOA1|UNK|MARS2|MIR499A	RSI-MGI_up
GO Biological Processes	GO:0009201	ribonucleoside triphosphate biosynthetic process	-2	2.2	12	ENTPD5|GALK1|HIF1A|NUP98|PGAM2|TPR|SLC25A13|DMAC2L|TREM2|DDIT4|SPHK2|UQCC3	RSI-MGI_up
GO Cellular Components	GO:1902493	acetyltransferase complex	-2	2.7	8	TAF2|TAF7|KAT2B|UBAP2L|TAF6L|ING3|SUPT20H|NAA30	RSI-MGI_up
GO Cellular Components	GO:0031248	protein acetyltransferase complex	-2	2.7	8	TAF2|TAF7|KAT2B|UBAP2L|TAF6L|ING3|SUPT20H|NAA30	RSI-MGI_up
GO Biological Processes	GO:0016052	carbohydrate catabolic process	-2	2.1	13	AGL|ENTPD5|FUT1|FUT2|GALK1|GUSB|HIF1A|NUP98|PGAM2|PHKG1|TPR|MAN2B2|DDIT4	RSI-MGI_up
GO Cellular Components	GO:0045177	apical part of cell	-2	1.8	21	AGER|ATP2B1|SEPTIN7|FN1|LDLR|PDE4D|ATP8B1|PSEN2|PTK2|SLC3A2|SLC4A2|FZD3|SLC9A3R2|AHCYL1|P2RX2|KCNE4|PARD3|SLC2A9|SLC4A5|AQP10|MTDH	RSI-MGI_up
GO Biological Processes	GO:0060968	regulation of gene silencing	-2	2.3	11	ESR1|H3-3B|NUP98|POLR2B|POLR2E|POLR2G|TPR|PUM1|AGO1|AGO2|ATF7IP	RSI-MGI_up
GO Molecular Functions	GO:0099516	ion antiporter activity	-2	3.3	6	SLC25A6|SLC4A3|SLC3A2|SLC4A2|SLC4A5|SLC37A2	RSI-MGI_up
GO Cellular Components	GO:0035577	azurophil granule membrane	-2	3.3	6	PSAP|VNN1|CPNE3|RAB3D|BRI3|TMEM179B	RSI-MGI_up
GO Molecular Functions	GO:0097110	scaffold protein binding	-2	3.3	6	KCNH2|NOS3|PDE4D|CACNA1G|TREM2|TREM1	RSI-MGI_up
Hallmark Gene Sets	M5915	HALLMARK APICAL JUNCTION	-2	2.1	13	ACTG2|CALB2|CNN2|ITGA9|ITGB4|KCNH2|PBX2|PIK3CB|PKD1|PPP2R2C|PTK2|EVL|AMIGO2	RSI-MGI_up
GO Biological Processes	GO:0070588	calcium ion transmembrane transport	-2	1.8	18	NIPSNAP2|ITPR1|PDE4B|PDE4D|PKD1|PSEN2|TRPC3|CACNA1G|F2RL3|TRDN|RASA3|TRPC4AP|PLCE1|CHRNA10|ORAI2|CACNA2D4|GRIN3B|BHLHA15	RSI-MGI_up
GO Biological Processes	GO:0045862	positive regulation of proteolysis	-2	1.8	20	AGER|CLU|FN1|HSPD1|HSPE1|PTK2|REST|TNF|BAG6|ROCK2|IST1|CLPX|TREM2|ANKIB1|BBS7|EDEM2|ANGPTL8|DIABLO|TBC1D10A|TMEM259	RSI-MGI_up
GO Biological Processes	GO:0006304	DNA modification	-2	2.5	9	MGMT|NTHL1|ASCC1|GATAD2A|ATF7IP|CDADC1|EXOSC6|TDRD9|TET3	RSI-MGI_up
